# Supplementary material for: The curious case of the photochemistry of 2-hydroxyphenylazo-3,5-dimethylisoxazole: unravelling the process among tautomerization, photoisomerization, and conformational changes
Source: Royal Society of Chemistry journal article supplement (doi:10.1039/d1cp05344b), 2022-01-01
Supplement: d1cp05344b1.pdf [file d1cp05344b1.pdf]

## The curious case of the photochemistry of 2-hydroxyphenylazo-3,5-dimethylisoxazole: Unravelling the process among tautomerization, photoisomerization, and conformational changes

Chitranjan Sah<sup>†</sup>, Anjali Mahadevan<sup>†</sup>, Pravesh Kumar and Sugumar Venkataramani\*

Department of Chemical Sciences, Indian Institute of Science Education and Research (IISER) Mohali, Sector-81, Knowledge City, SAS Nagar, Mohali, Punjab – 140306, India.

E-mail: sugumarv@iisermohali.ac.in

|            |                                                                               |     |
|------------|-------------------------------------------------------------------------------|-----|
| <b>S1.</b> | General methods                                                               | S2  |
| <b>S2.</b> | Synthesis and characterization data                                           | S3  |
| <b>S3.</b> | Deposition spectrum and computed IR data of various conformers                | S4  |
| <b>S4.</b> | AIM analysis                                                                  | S16 |
| <b>S5.</b> | Assignment of conformers (experiment vs computational)                        | S17 |
| <b>S6.</b> | Solution phase photoswitching and kinetics data: UV-Vis spectroscopic studies | S31 |
| <b>S7.</b> | Computational mechanistic aspects                                             | S34 |
| <b>S8.</b> | Cartesian coordinates                                                         | S38 |
| <b>S9.</b> | References                                                                    | S45 |

## S1: General methods

All the geometrical optimization for all the conformers of *E*- and *Z*- isomers of HPAI and the transition states have been performed at density functional theory<sup>1</sup> with M06-2X<sup>2</sup> and  $\omega$ B97X-D<sup>3</sup> functional using cc-pVTZ<sup>4,5</sup> and def2tzvp<sup>6</sup> basis set respectively. The optimized geometries have been verified to minima/transition state by frequency calculations. (That is zero and one imaginary frequency corresponding to minima and transition state respectively). Intrinsic reaction coordinate<sup>7</sup> (IRC) analysis has been performed at the B3LYP/cc-pVTZ level of theory to verify the true transition states<sup>8</sup>, which are part of the potential energy surfaces connecting reactant and the product. The relative energies have been estimated using vibrational zero-point energy (ZPE) corrected electronic energy or thermal corrected energy (at 298 K).

For UV-vis spectroscopic studies, spectroscopic grade solvent (DMSO) purchased from Spectrochem has been used. Analysis of UV-vis photoswitching and kinetics studies have been performed on a Cary 60 UV-vis spectrophotometer from Agilent technology attached with a temperature controller Peltier assembly, and data processing was done using OriginPro 2017 (64-bit). The experiments were performed using a quartz Cuvette of 1 cm path length from Sigma Aldrich until the attainment of photostationary state (PSS). For the forward *E-Z* and reverse *Z-E* photoisomerization steps, the spectral data have been collected under simultaneous irradiation of light at a right angle to the optical beam from the light source of the spectrophotometer. For forward (*E-Z*) photoisomerization, a commercial LED torch (Convoy S2+, 365 nm, 40 mW) and for the reverse (*Z-E*) photoisomerization a light of wavelength 470 nm from Applied Photophysics (SX20 LED) have been used.

## S2: Synthesis and characterization data

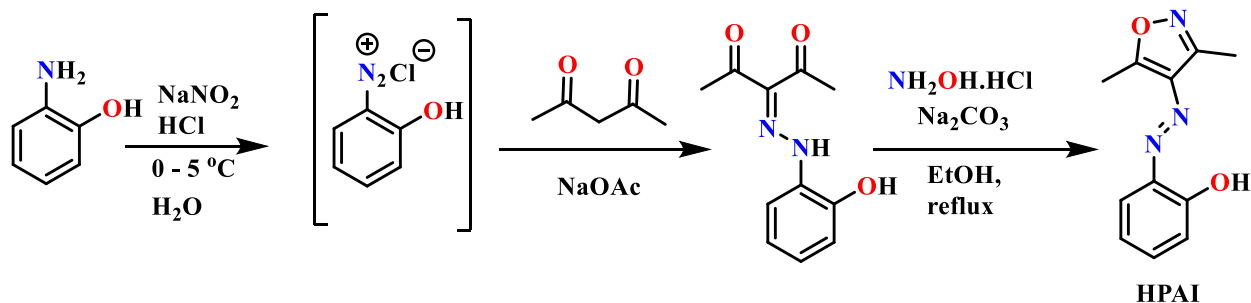

**Scheme S1.** Synthesis of 2-hydroxyphenylazo-3,5-dimethylisoxazole (HPAI).

### Synthesis of HPAI<sup>9</sup>

In a RB flask 2-hydroxyaniline (5.0 mmol) in distilled water was cooled to 0 °C. Then conc. HCl (37%, 1.6 ml) was added dropwise and stirred. A cold aqueous solution of NaNO<sub>2</sub> (5.5 mmol) in 5 ml of distilled water was added dropwise to the reaction mixture. The reaction mixture was stirred at 0 °C for half an hour. In another flask, a mixture of sodium acetate (17.5 mmol) and acetylacetone (5.0 mmol) in water (25 ml) and methanol (3 ml) was cooled to 0 °C, and was charged into the diazonium salt. The reaction was then stirred at room temperature for 2 hours and monitored for completion by TLC. The resulting yellow to orange precipitate was filtered and washed with water and dried under vacuum. Without further purification, the acetylacetone derivative (1.0 mmol) was refluxed along with hydroxylamine hydrochloride (1.5 mmol), and sodium carbonate (1.5 mmol) in 10 ml ethanol. The reaction was monitored by TLC and upon completion, the solvent was evaporated and purified by column chromatography using ethylacetate/hexane mixture.

**(E)-2-((3,5-dimethylisoxazole-4-yl)diazenyl)phenol:** yellow solid, mp = 114 °C, 201.9 mg, 93% yield; <sup>1</sup>H NMR (400 MHz, CDCl<sub>3</sub>): δ 2.53 (s, 3H), 2.70 (s, 3H), 7.01 (dd, *J* = 8.3, 1.1 Hz, 1H), 7.05 (td, *J* = 8.0, 1.2 Hz, 1H), 7.31-7.366 (m, 1H), 7.82 (dd, *J* = 7.9 Hz, 1.6 Hz, 1H), 11.94 (s, 1H); <sup>13</sup>C NMR (100 MHz, CDCl<sub>3</sub>): δ 12.1, 12.1, 118.2, 120.2, 130.8, 132.2, 133.2, 137.7, 152.1, 154.1, 167.4; HRMS (ESI-TOF): calcd. for C<sub>11</sub>H<sub>11</sub>N<sub>3</sub>O<sub>2</sub> [M+H]<sup>+</sup> 218.0930, found 218.0923; IR (ATR, cm<sup>-1</sup>) 3510, 3178, 1591, 1220, 779.

### S3: Deposition spectrum of HPAI and computed IR data of various conformers

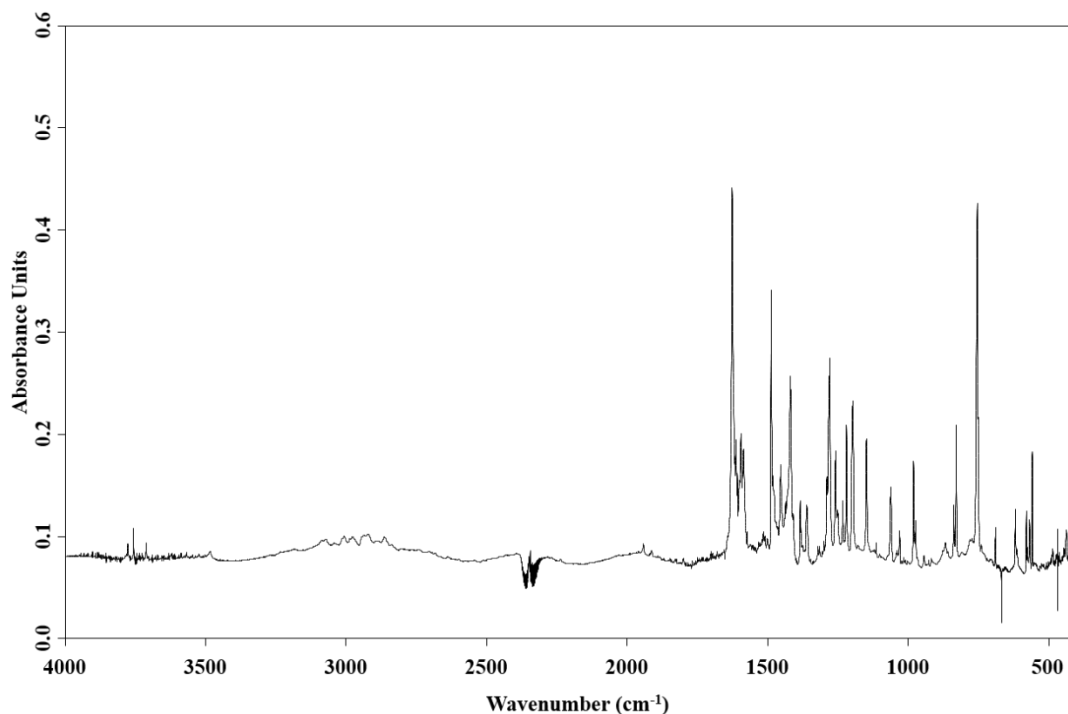

Figure S1. Experimental IR spectrum of **HPAI** isolated in Ar matrix at 4K.

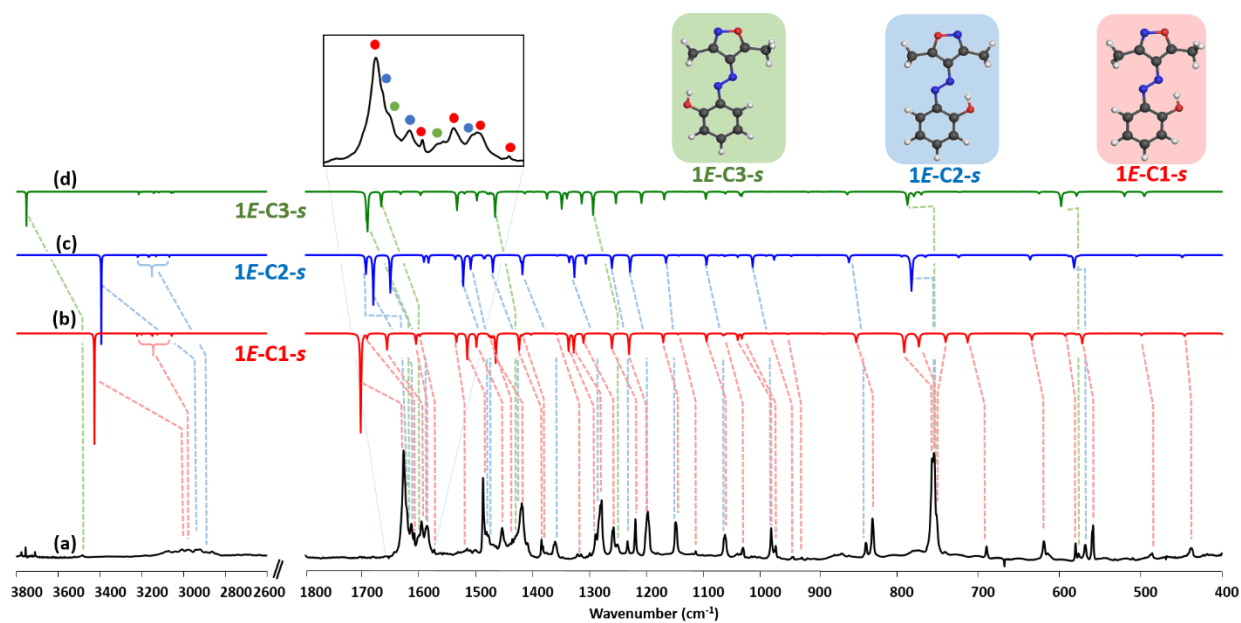

Figure S2. Matrix isolation infrared spectroscopic studies on **HPAI**. (a) Deposition spectrum of *E*-**HPAI** (Ar, 4 K); (b-d) Computed spectra of the conformers **1E-C1-s** (red), **1E-C2-s** (blue), and **1E-C3-s** (green) (M06-2X/cc-pVTZ level of theory, unscaled). The zoomed portion with assignments of the features around 1600  $\text{cm}^{-1}$  corresponding to the three conformers (in their respective colour codes) and the optimized structures of them are included at the top.

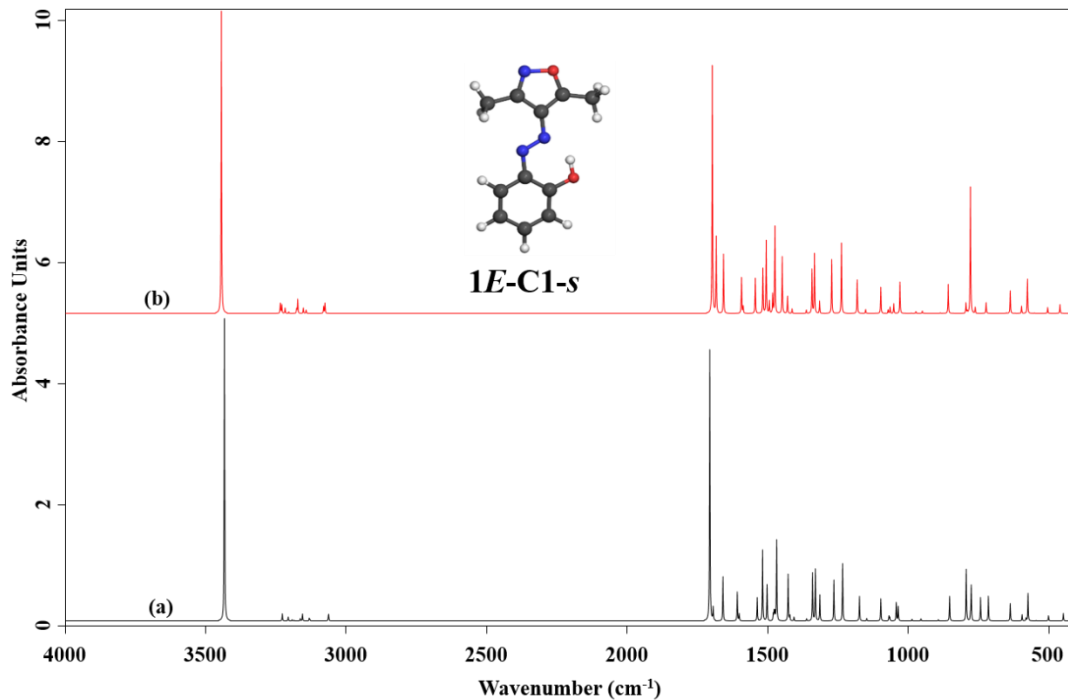

**Figure S3.** Simulated IR spectra of **1E-C1-s** based on M06-2x/cc-pVTZ (black) and  $\omega$ B97X-D/def2tzvp (red) harmonic vibrational frequencies, (unscaled).

Most intense signal:  $3432.5/3445.2 \text{ cm}^{-1}$ ;  $I_{\text{abs}}: 290.6/258.6$

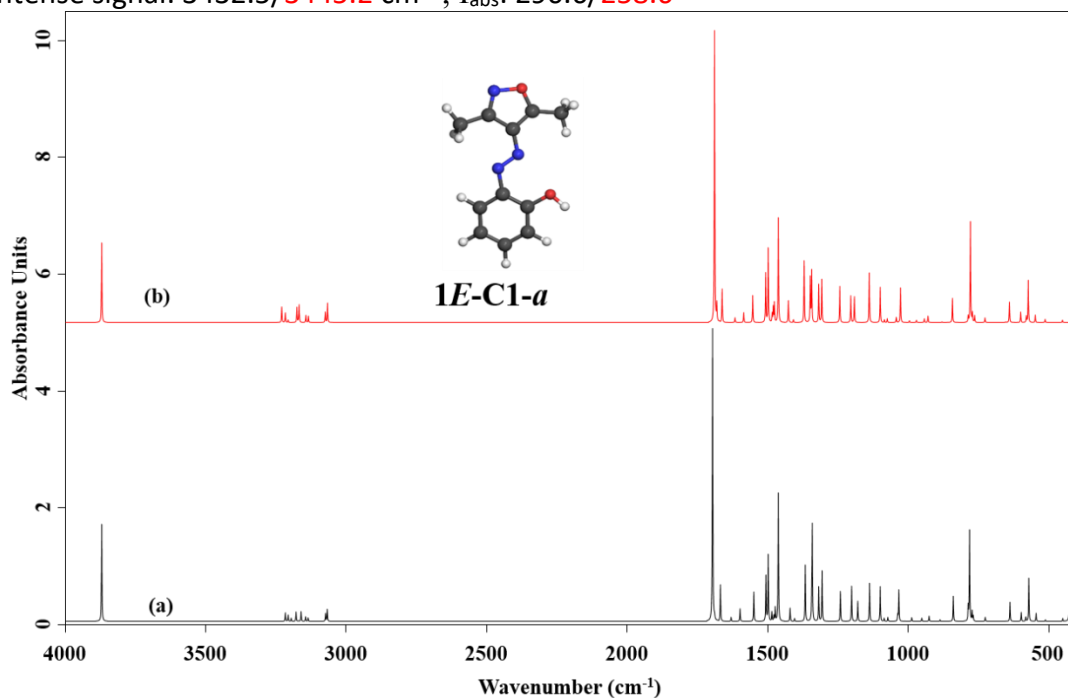

**Figure S4.** Simulated IR spectra of **1E-C1-a** based on M06-2x/cc-pVTZ (black) and  $\omega$ B97X-D/def2tzvp (red) harmonic vibrational frequencies, (unscaled).

Most intense signal:  $1696.5/1689.1 \text{ cm}^{-1}$ ;  $I_{\text{abs}}: 214.3/213.8$

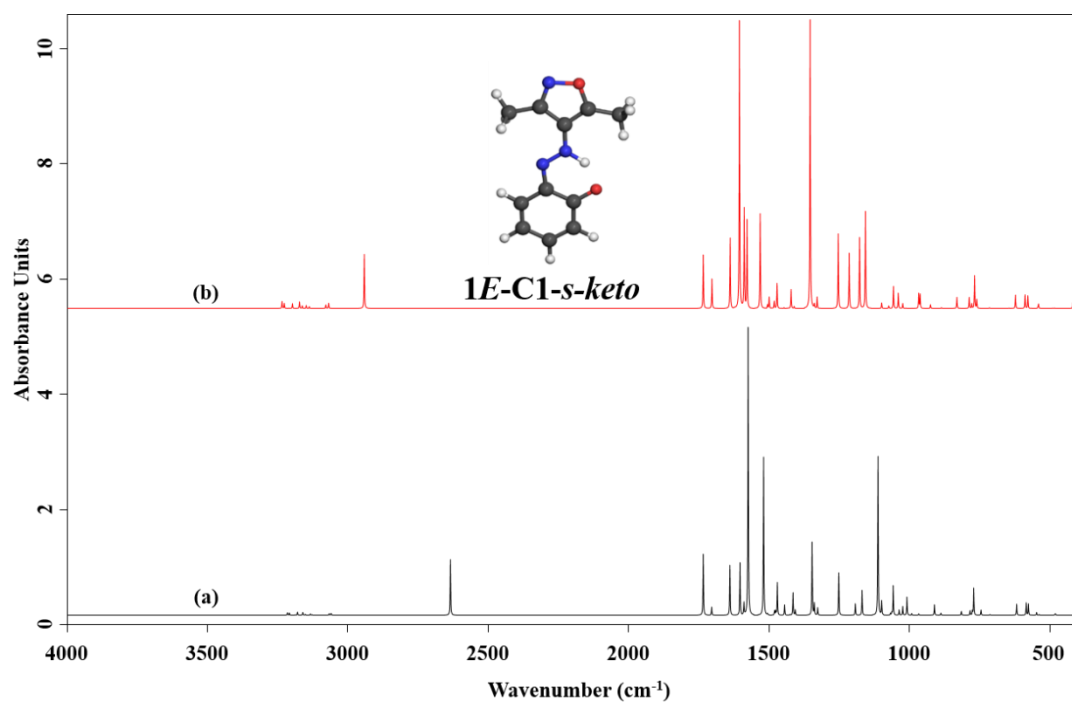

**Figure S5.** Simulated IR spectra of **1E-C1-s-keto** based on M06-2x/cc-pVTZ (black) and  $\omega$ B97X-D/def2tzvp (red) harmonic vibrational frequencies, (unscaled).

Most intense signal: 1574.1/**1353.3**  $\text{cm}^{-1}$ ;  $I_{\text{abs}}$ : 619.1/**477.4**

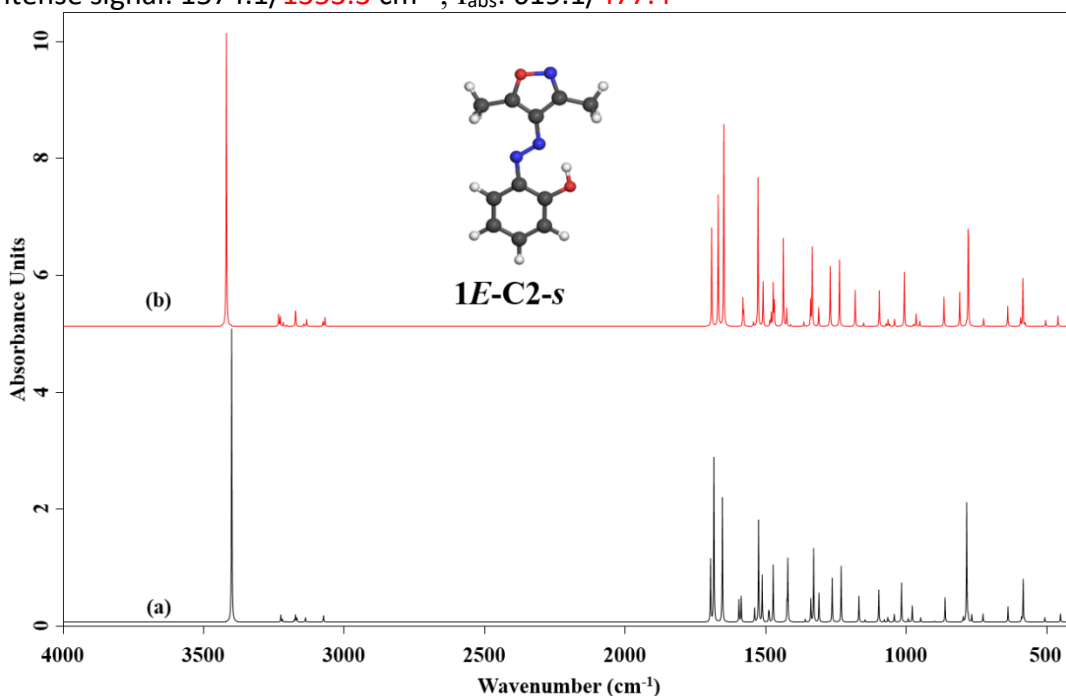

**Figure S6.** Simulated IR spectra of **1E-C2-s** based on M06-2x/cc-pVTZ (black) and  $\omega$ B97X-D/def2tzvp (red) harmonic vibrational frequencies, (unscaled).

Most intense signal: 3401.7/**3420.6**  $\text{cm}^{-1}$ ;  $I_{\text{abs}}$ : 274.5/**241.2**

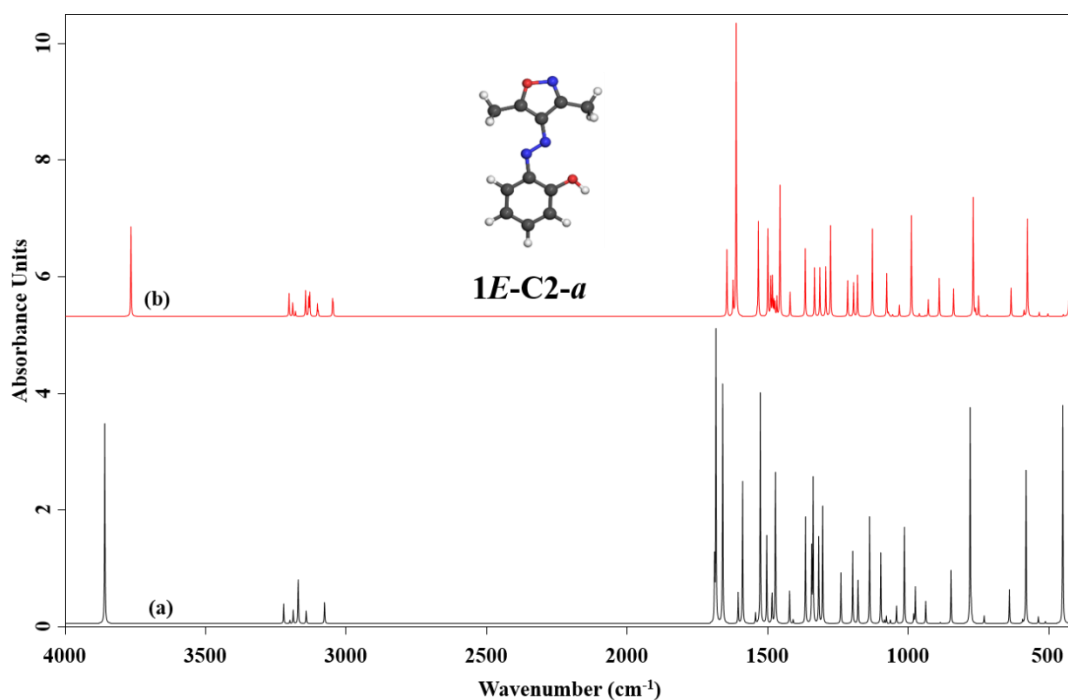

**Figure S7.** Simulated IR spectra of **1E-C2-a** based on M06-2x/cc-pVTZ (black) and  $\omega$ B97X-D/def2tzvp (red) harmonic vibrational frequencies, (unscaled).

Most intense signal: 1684.3/**1612.3**  $\text{cm}^{-1}$ ;  $I_{\text{abs}}$ : 107.3/**165.4**

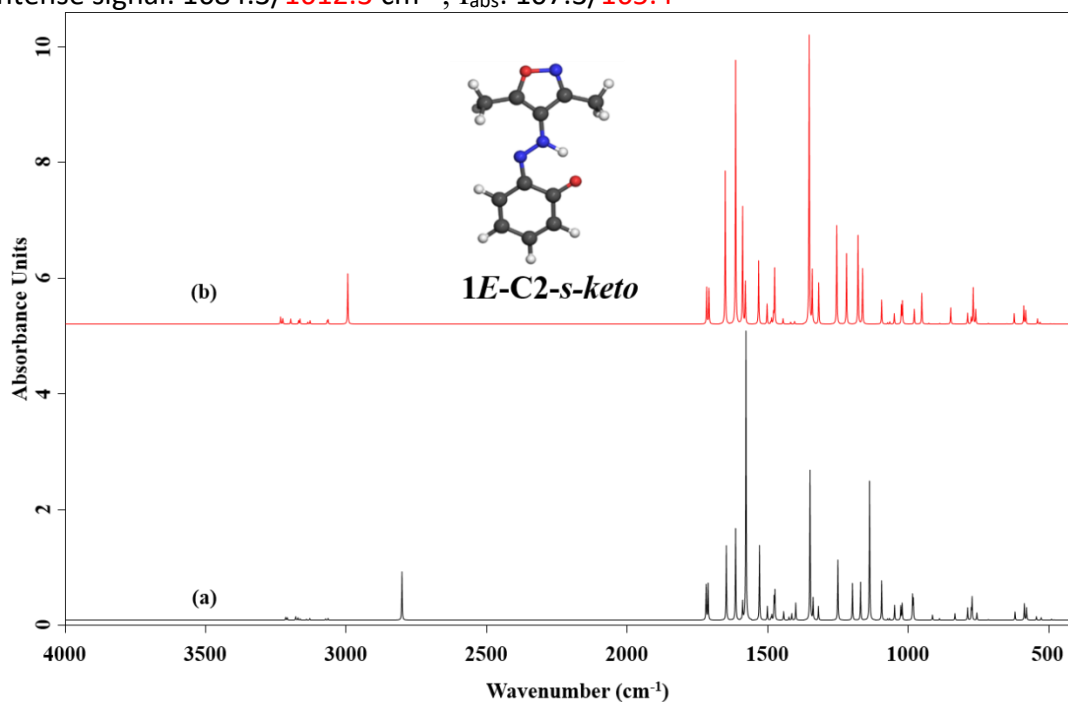

**Figure S8.** Simulated IR spectra of **1E-C2-s-keto** based on M06-2x/cc-pVTZ (black) and  $\omega$ B97X-D/def2tzvp (red) harmonic vibrational frequencies, (unscaled).

Most intense signal: 1577.4/**1352.8**  $\text{cm}^{-1}$ ;  $I_{\text{abs}}$ : 563.9/**446.9**

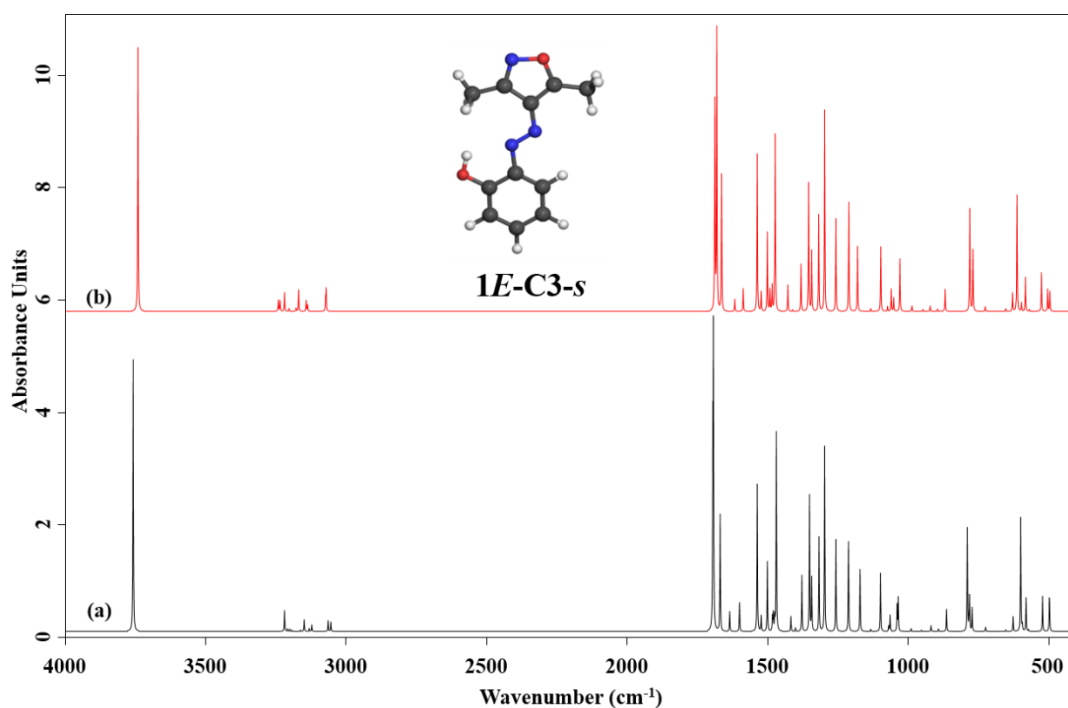

**Figure S9.** Simulated IR spectra of **1E-C3-s** based on M06-2x/cc-pVTZ (black) and  $\omega$ B97X-D/def2tzvp (red) harmonic vibrational frequencies, (unscaled).

Most intense signal: 1693.8/1681.6  $\text{cm}^{-1}$ ;  $I_{\text{abs}}$ : 147.8/146.1

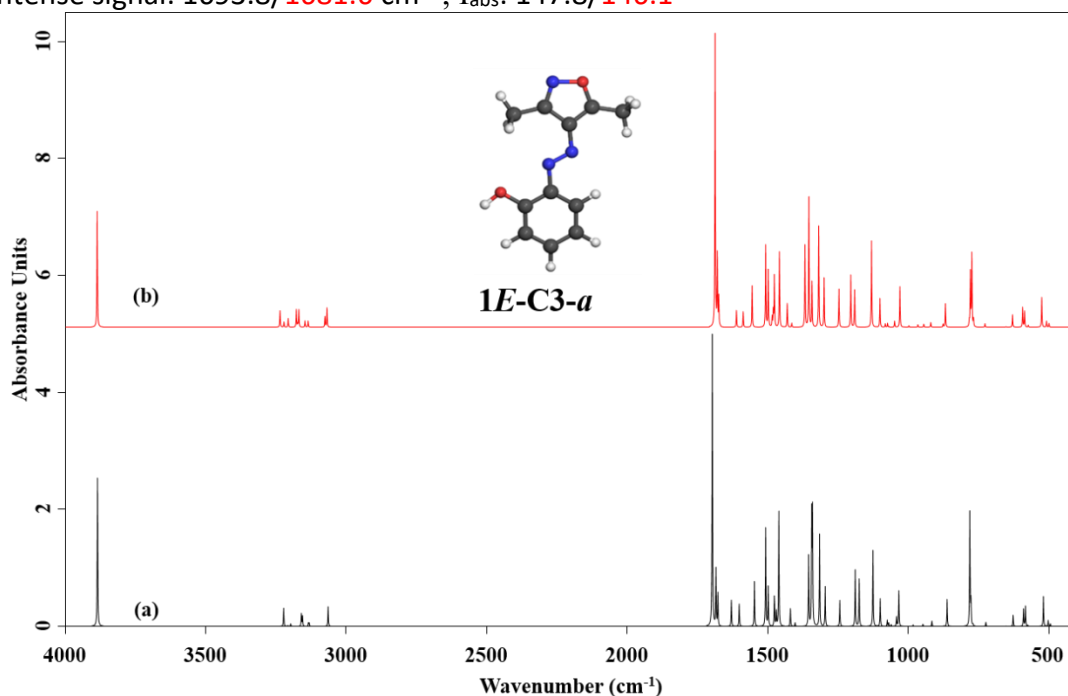

**Figure S10.** Simulated IR spectra of **1E-C3-a** based on M06-2x/cc-pVTZ (black) and  $\omega$ B97X-D/def2tzvp (red) harmonic vibrational frequencies, (unscaled).

Most intense signal: 1697.0/1687.2  $\text{cm}^{-1}$ ;  $I_{\text{abs}}$ : 190.9/197.1



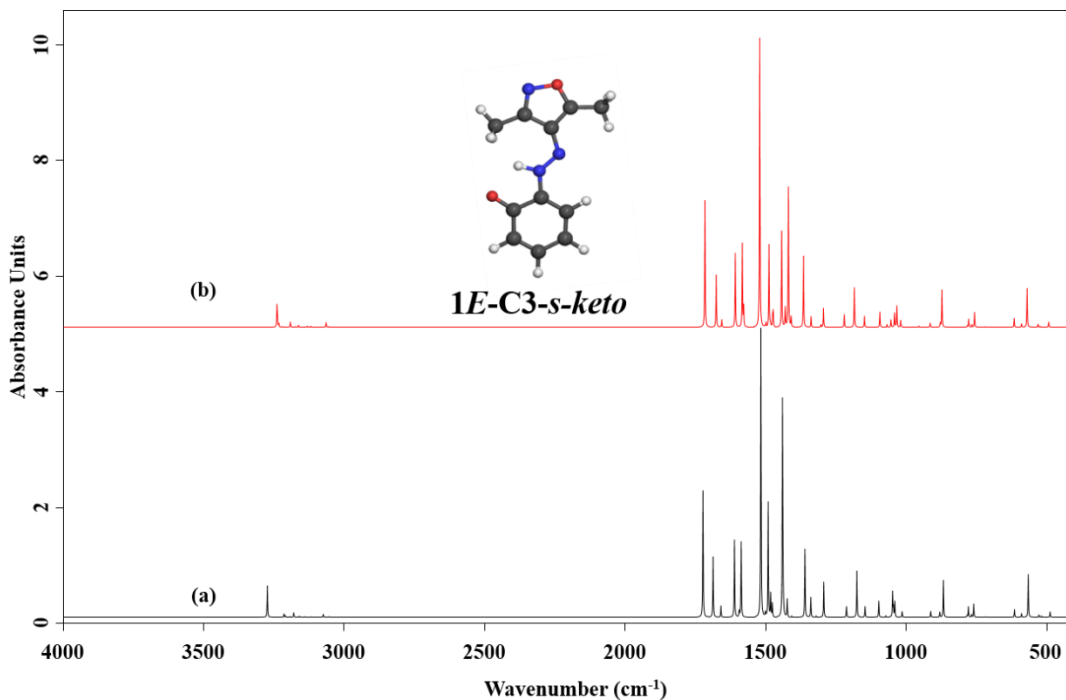

**Figure S11.** Simulated IR spectra of **1E-C3-s-keto** based on M06-2x/cc-pVTZ (black) and  $\omega$ B97X-D/def2tzvp (red) harmonic vibrational frequencies, (unscaled).  
Most intense signal: 1517.7/1521.9  $\text{cm}^{-1}$ ;  $I_{\text{abs}}$ : 703.3/753.8

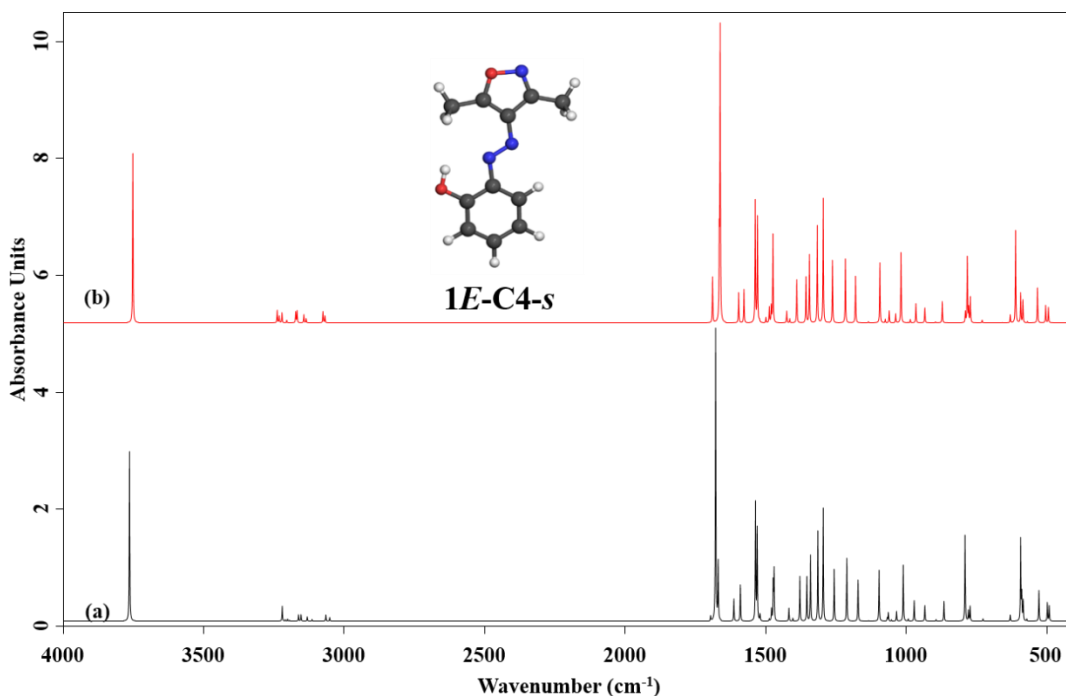

**Figure S12.** Simulated IR spectra of **1E-C4-s** based on M06-2x/cc-pVTZ (black) and  $\omega$ B97X-D/def2tzvp (red) harmonic vibrational frequencies, (unscaled).  
Most intense signal: 1672.3/1662.6  $\text{cm}^{-1}$ ;  $I_{\text{abs}}$ : 204.6/200.6

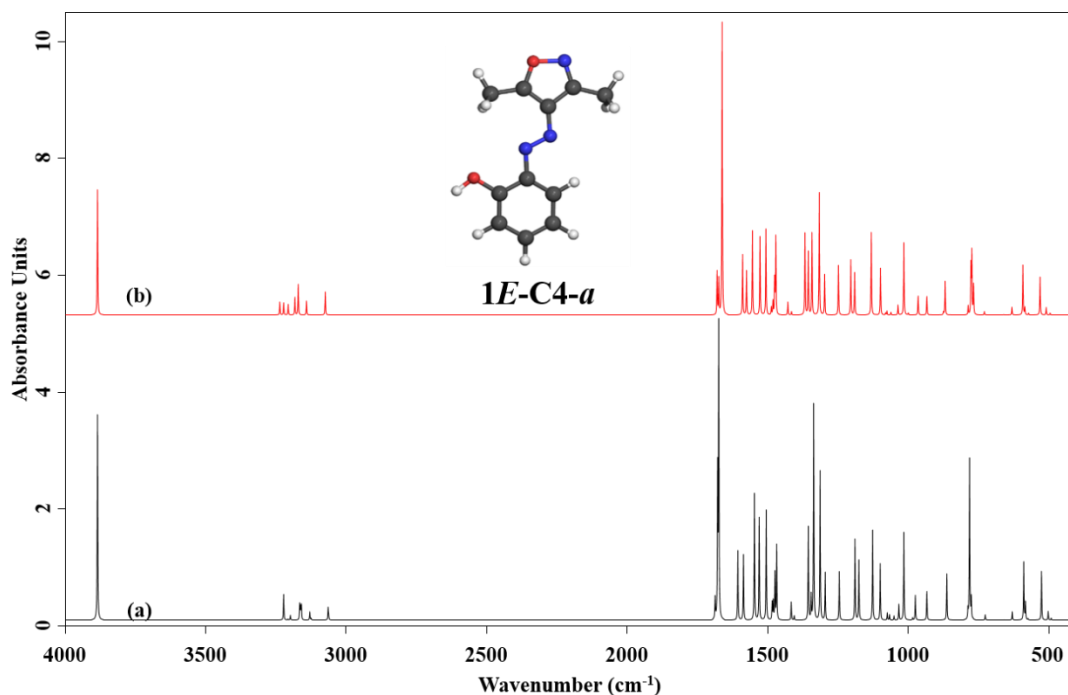

**Figure S13.** Simulated IR spectra of **1E-C4-a** based on M06-2x/cc-pVTZ (black) and  $\omega$ B97X-D/def2tzvp (red) harmonic vibrational frequencies, (unscaled).

Most intense signal: 1674.2/**1662.3**  $\text{cm}^{-1}$ ;  $I_{\text{abs}}$ : 133.3/**175.7**

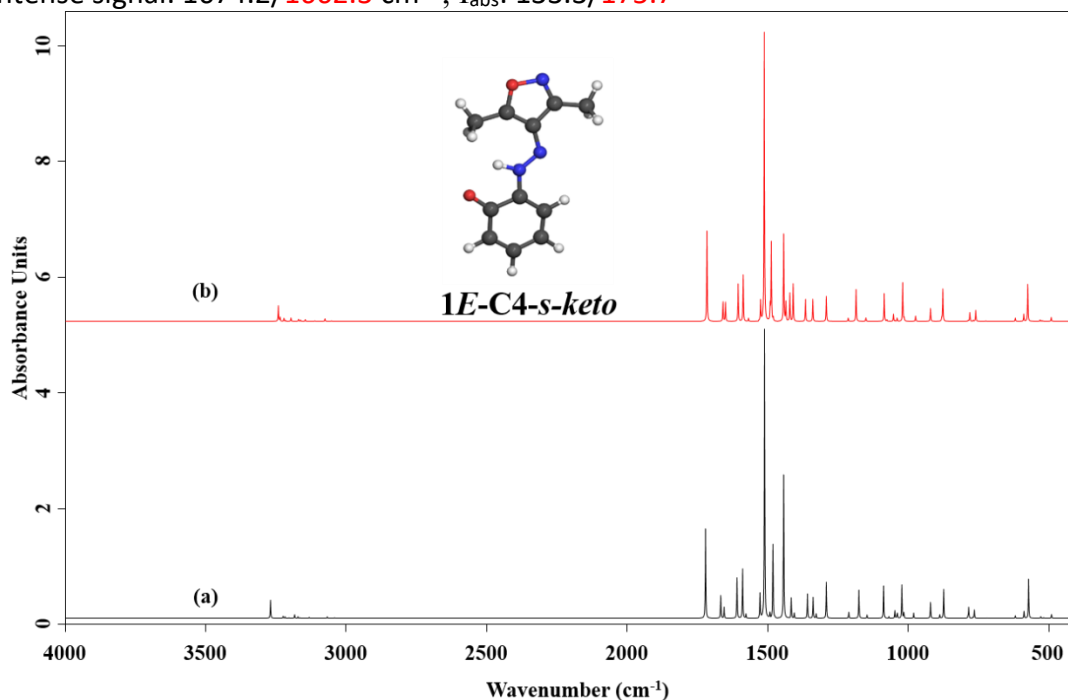

**Figure S14.** Simulated IR spectra of **1E-C4-s-keto** based on M06-2x/cc-pVTZ (black) and  $\omega$ B97X-D/def2tzvp (red) harmonic vibrational frequencies, (unscaled).

Most intense signal: 1511.8/**1512.1**  $\text{cm}^{-1}$ ;  $I_{\text{abs}}$ : 873.6/**903.8**

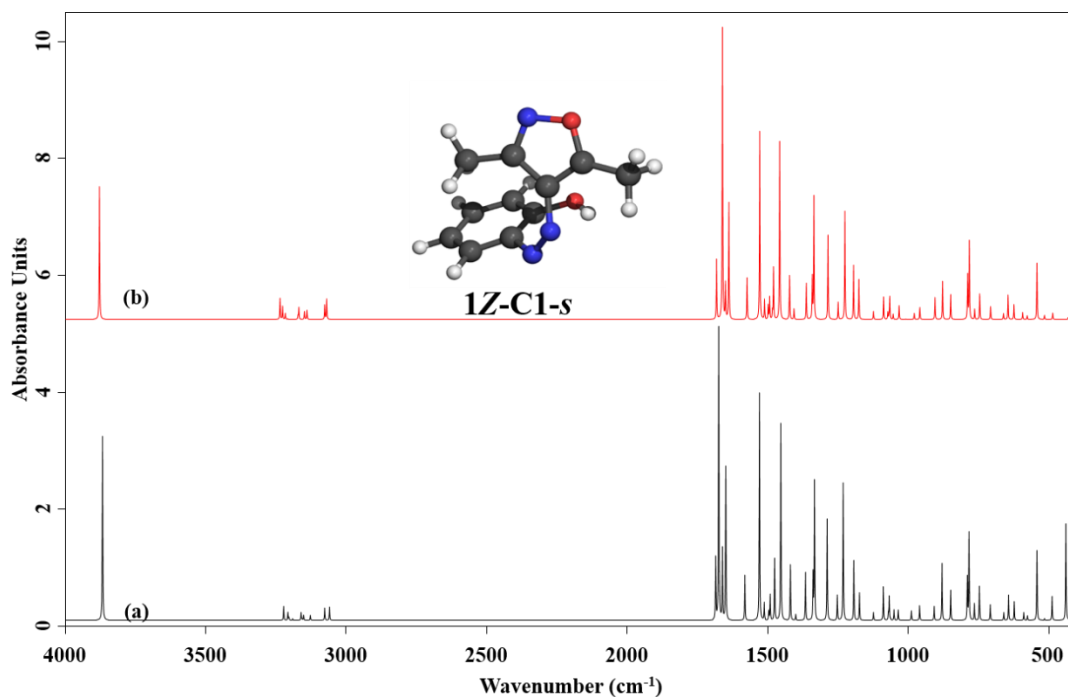

**Figure S15.** Simulated IR spectra of **1Z-C1-s** based on M06-2x/cc-pVTZ (black) and  $\omega$ B97X-D/def2tzvp (red) harmonic vibrational frequencies, (unscaled).  
 Most intense signal: 1674.3/**1661.7**  $\text{cm}^{-1}$ ;  $I_{\text{abs}}$ : 103.0/**117.0**

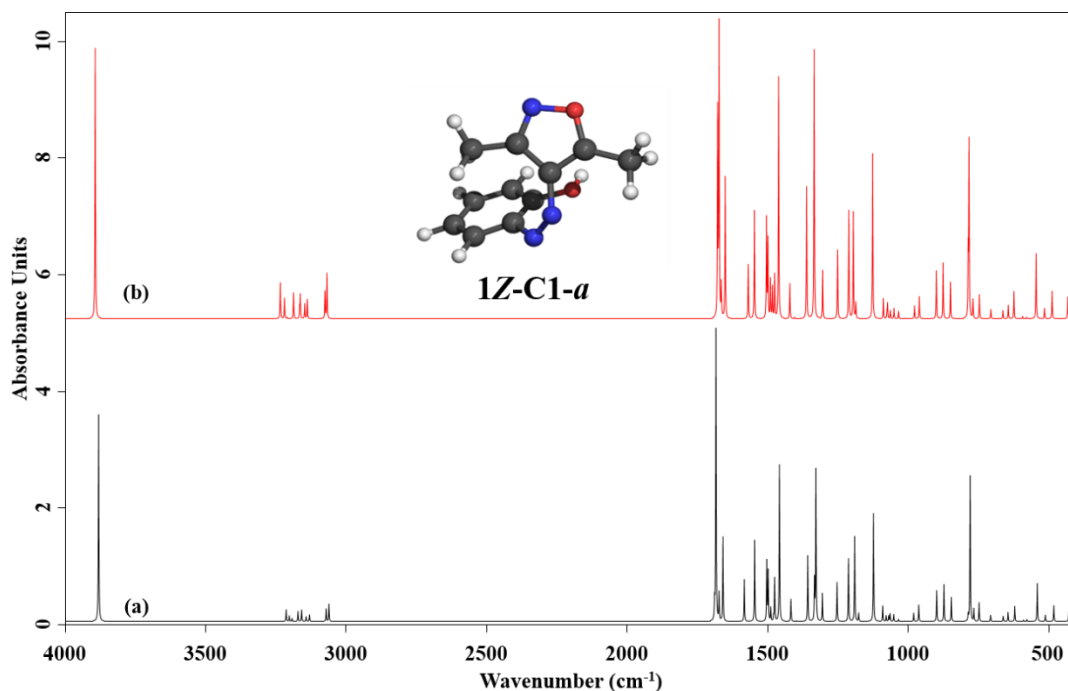

**Figure S16.** Simulated IR spectra of **1Z-C1-a** based on M06-2x/cc-pVTZ (black) and  $\omega$ B97X-D/def2tzvp (red) harmonic vibrational frequencies, (unscaled).  
 Most intense signal: 1684.7/**1673.3**  $\text{cm}^{-1}$ ;  $I_{\text{abs}}$ : 122.4/**78.0**

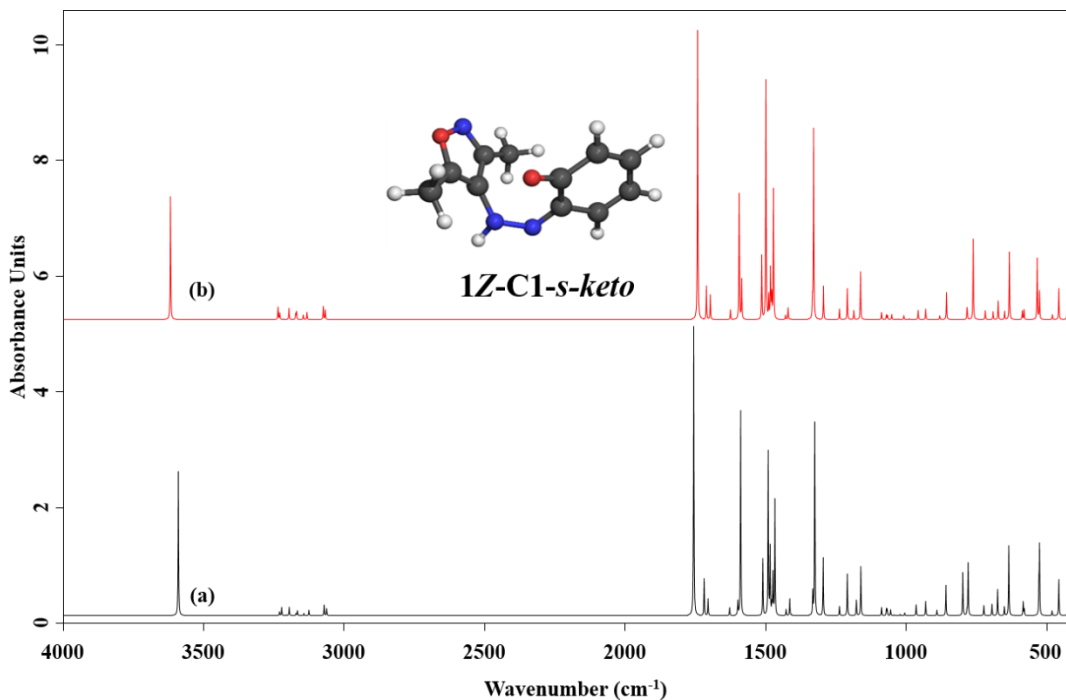

**Figure S17.** Simulated IR spectra of **1Z-C1-s-keto** based on M06-2x/cc-pVTZ (black) and  $\omega$ B97X-D/def2tzvp (red) harmonic vibrational frequencies, (unscaled).  
 Most intense signal: 1756.9/1742.1  $\text{cm}^{-1}$ ;  $I_{\text{abs}}$ : 228.1/238.9

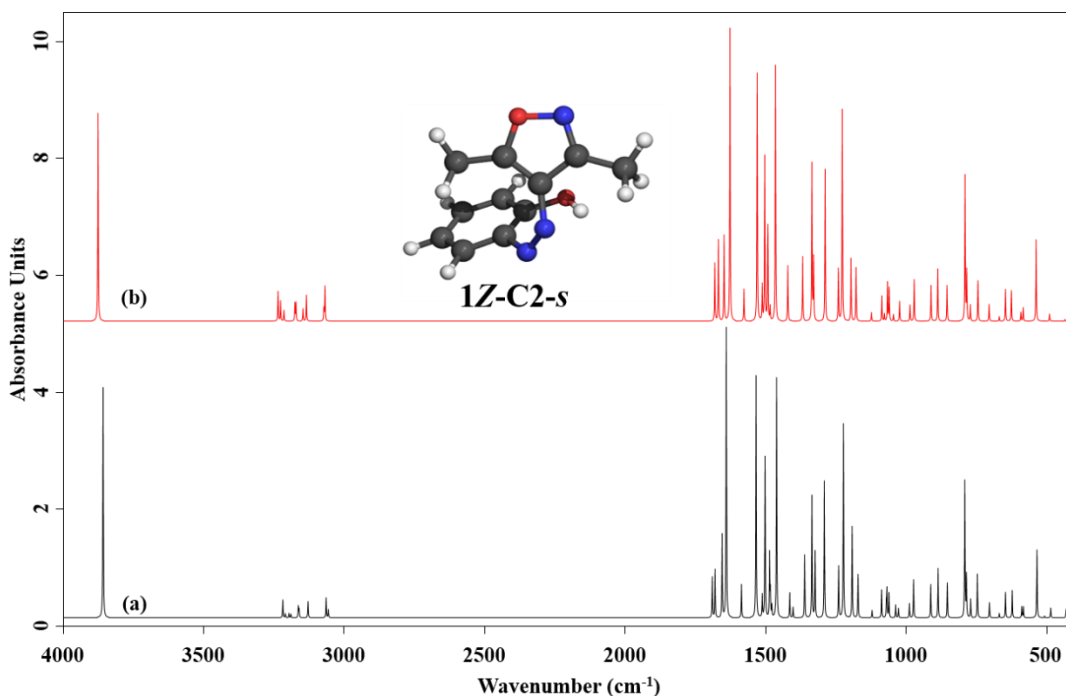

**Figure S18.** Simulated IR spectra of **1Z-C2-s** based on M06-2x/cc-pVTZ (black) and  $\omega$ B97X-D/def2tzvp (red) harmonic vibrational frequencies, (unscaled).  
 Most intense signal: 1640.8/1661.7  $\text{cm}^{-1}$ ;  $I_{\text{abs}}$ : 82.5/117.0

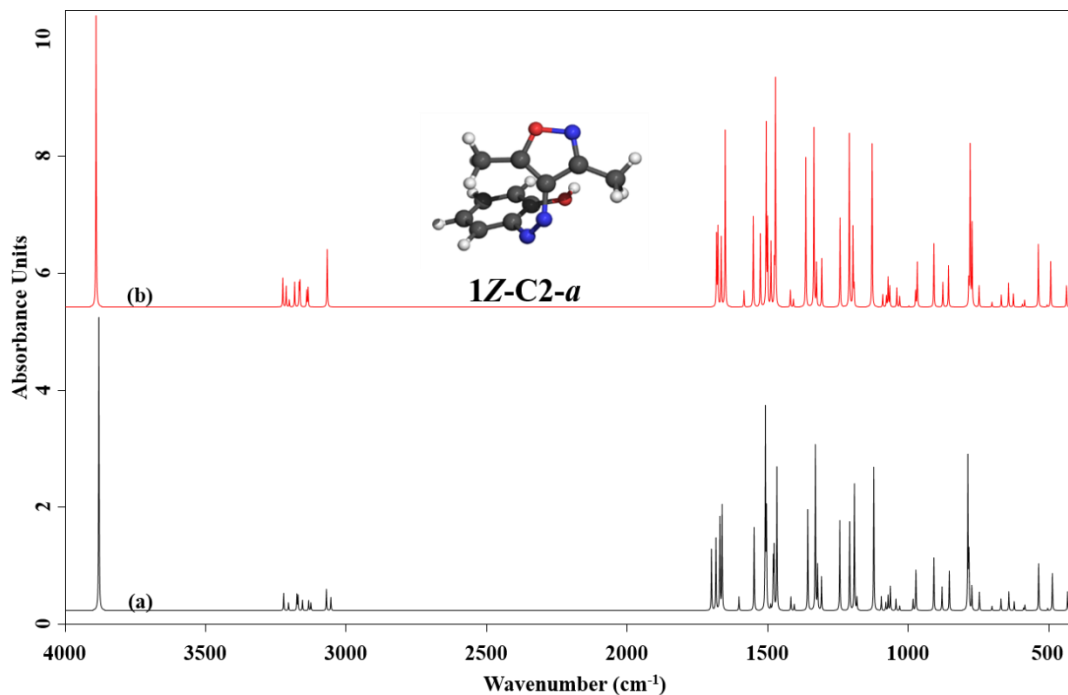

**Figure S19.** Simulated IR spectra of **1Z-C2-a** based on M06-2x/cc-pVTZ (black) and  $\omega$ B97X-D/def2tzvp (red) harmonic vibrational frequencies, (unscaled).  
Most intense signal: 3881.7/**3891.0**cm<sup>-1</sup>;  $I_{\text{abs}}$ : 90.3 /**75.6**

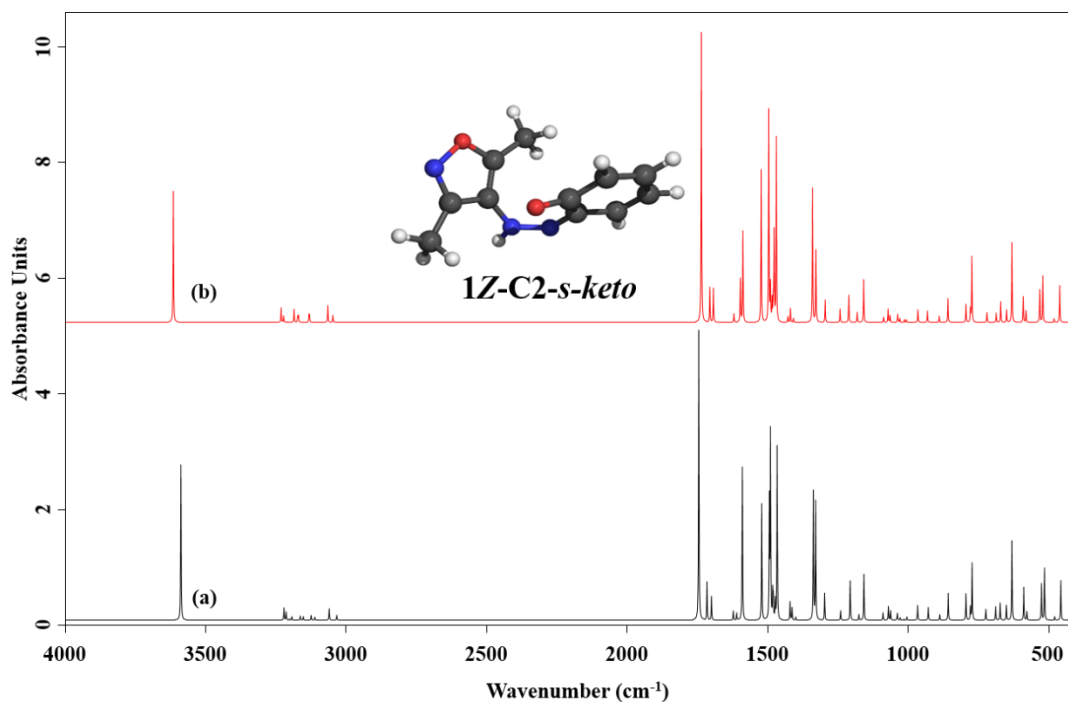

**Figure S20.** Simulated IR spectra of **1Z-C2-s-keto** based on M06-2x/cc-pVTZ (black) and  $\omega$ B97X-D/def2tzvp (red) harmonic vibrational frequencies, (unscaled).  
Most intense signal: 1745.4/**1736.4**cm<sup>-1</sup>;  $I_{\text{abs}}$ : 219.5/**223.0**

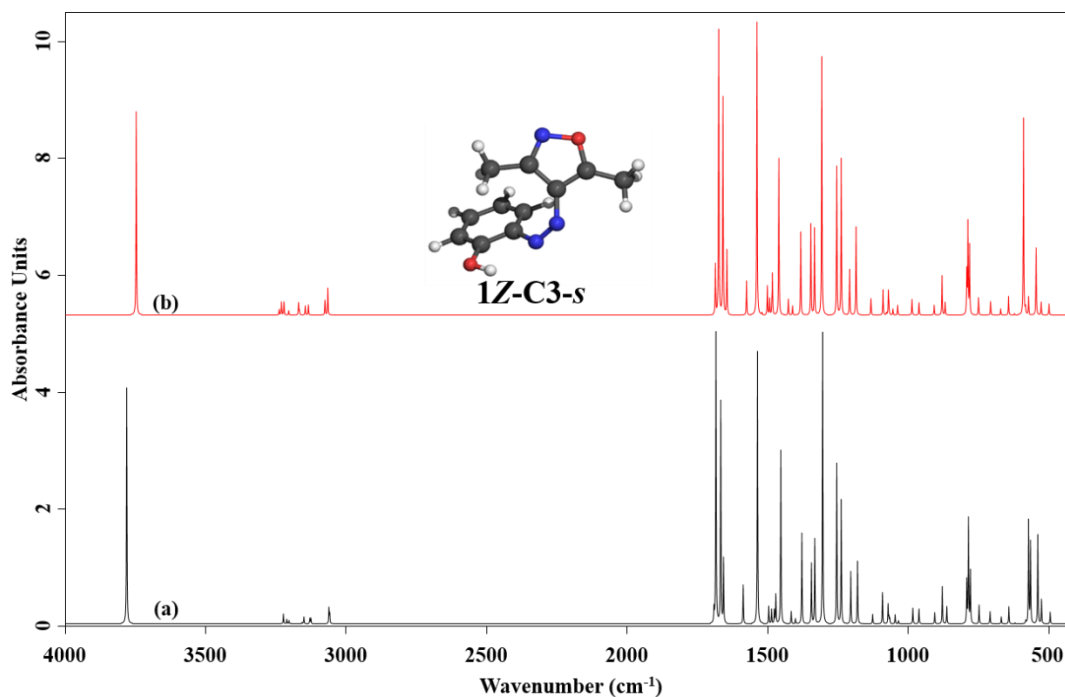

**Figure S21.** Simulated IR spectra of **1Z-C3-s** based on M06-2x/cc-pVTZ (black) and  $\omega$ B97X-D/def2tzvp (red) harmonic vibrational frequencies, (unscaled).  
Most intense signal: 1304.1/1538.0  $\text{cm}^{-1}$ ;  $I_{\text{abs}}$ : 119.5/118.2

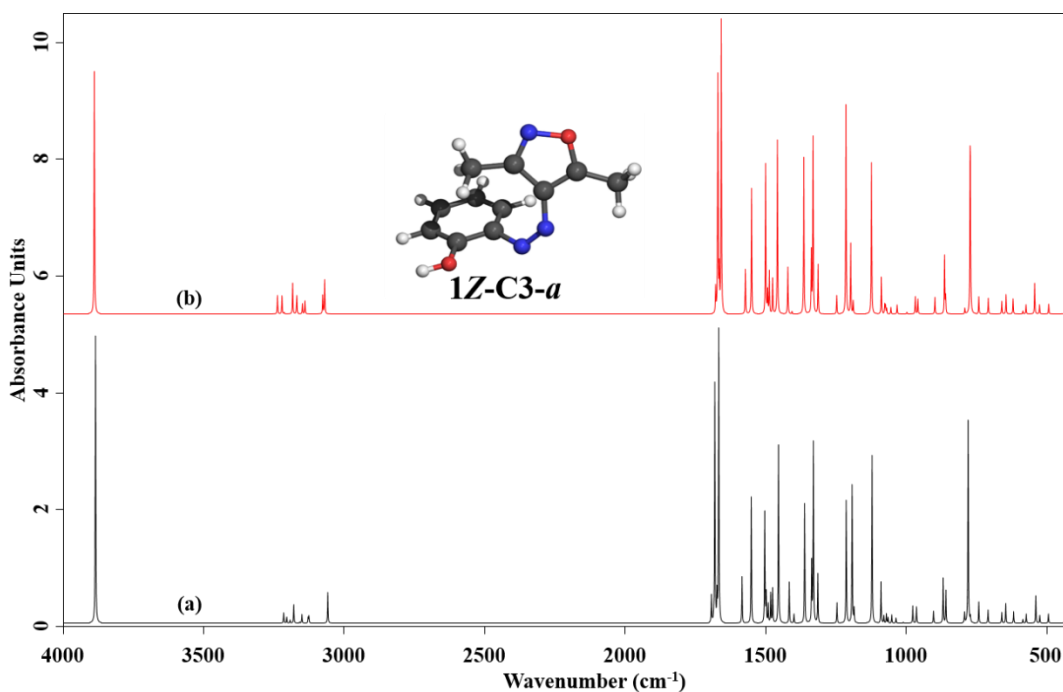

**Figure S22.** Simulated IR spectra of **1Z-C3-a** based on M06-2x/cc-pVTZ (black) and  $\omega$ B97X-D/def2tzvp (red) harmonic vibrational frequencies, (unscaled).  
Most intense signal: 1667.5/1658.1  $\text{cm}^{-1}$ ;  $I_{\text{abs}}$ : 105.5/102.2

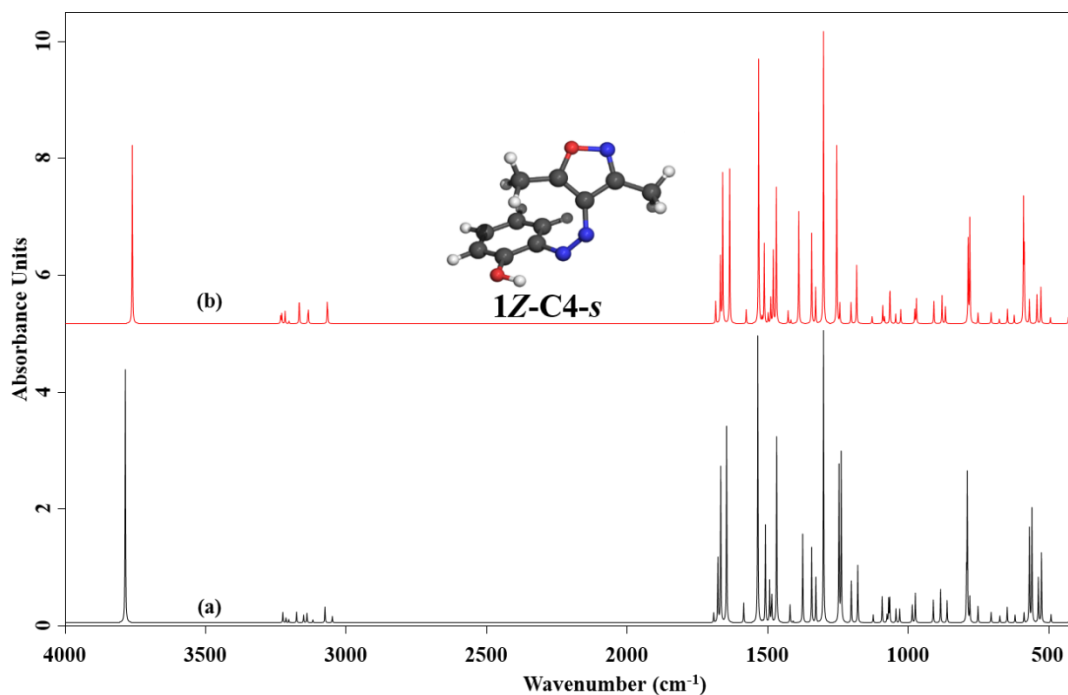

**Figure S23.** Simulated IR spectra of **1Z-C4-s** based on M06-2x/cc-pVTZ (black) and  $\omega$ B97X-D/def2tzvp (red) harmonic vibrational frequencies, (unscaled).  
Most intense signal: 1301.7/**1301.8**cm<sup>-1</sup>;  $I_{\text{abs}}$ : 127.9/**109.8**

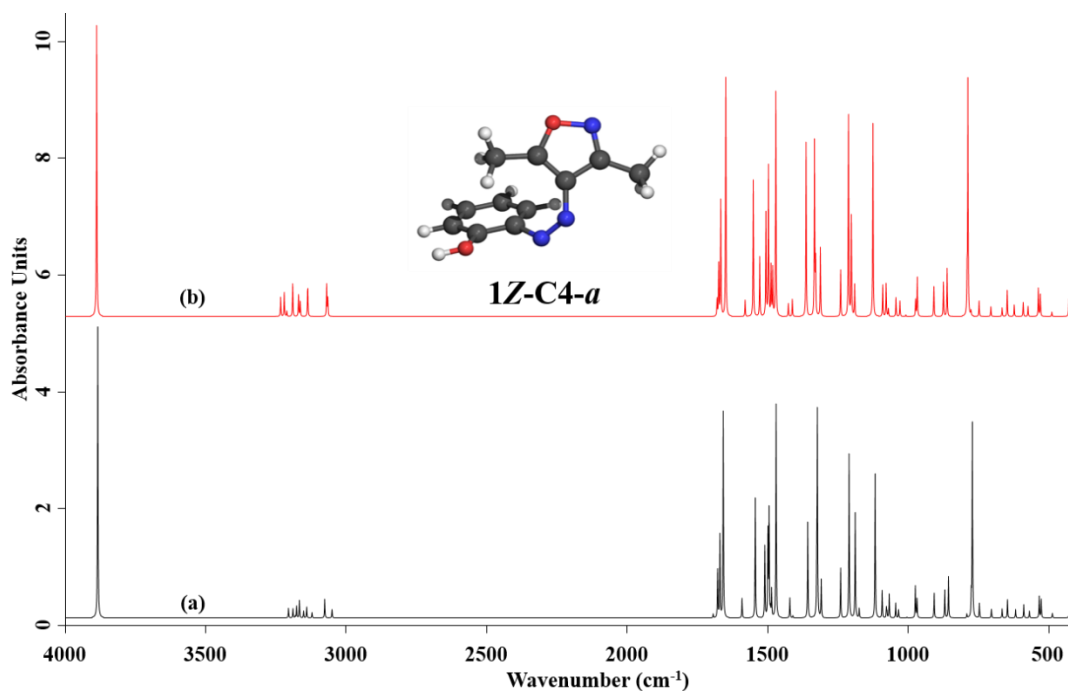

**Figure S24.** Simulated IR spectra of **1Z-C4-a** based on M06-2x/cc-pVTZ (black) and  $\omega$ B97X-D/def2tzvp (red) harmonic vibrational frequencies, (unscaled).  
Most intense signal: 3885.8/**3889.5** cm<sup>-1</sup>;  $I_{\text{abs}}$ : 102.8/**84.6**

#### S4: AIM analysis

**Table S1.** Electron density [ $\rho(r_c)$ ], Laplacian of electron density [ $\nabla^2\rho(r_c)$ ], local electronic kinetic energy density [ $G(r_c)$ ], local electronic potential energy density [ $V(r_c)$ ] and hydrogen bonding energy ( $E_{HB}$ ) values for the hydrogen bonded interactions in the different conformers of HPAI at M06-2x/cc-pVTZ. The values for  $\rho(r_c)$ ,  $\nabla^2\rho(r_c)$ ,  $G(r_c)$  and  $V(r_c)$  are given in atomic units and for  $E_{HB}$ , in kcal mol<sup>-1</sup>

| Species        | Interaction | $\rho(r_c)$ | $\nabla^2\rho(r_c)$ | $G(r_c)$ | $V(r_c)$ | $E_{HB}$ |
|----------------|-------------|-------------|---------------------|----------|----------|----------|
| <b>1E-C1-s</b> | N---O-H     | 0.04777     | 0.09419             | 0.03378  | -0.04402 | -13.8    |
| <b>1E-C2-s</b> | N---O-H     | 0.04898     | 0.09449             | 0.03461  | -0.04559 | -14.3    |
| <b>1E-C3-s</b> | N---O-H     | 0.02250     | 0.09790             | 0.02150  | -0.01852 | -5.8     |
| <b>1E-C4-s</b> | N---O-H     | 0.02234     | 0.09720             | 0.02132  | -0.01834 | -5.8     |
| <b>1Z-C1-s</b> | H-O---C     | 0.01225     | 0.04654             | 0.00964  | -0.00765 | -2.4     |
| <b>1Z-C2-s</b> | H-O---C     | 0.01189     | 0.04583             | 0.00943  | -0.00740 | -2.3     |
| <b>1Z-C3-s</b> | H-O---C     | 0.01127     | 0.04023             | 0.00834  | -0.00663 | -2.1     |
| <b>1Z-C4-s</b> | H-O---C     | 0.01053     | 0.03846             | 0.00788  | -0.00613 | -1.9     |



### S5: Assignment of conformers (experiment vs computational)

**Table S2.** Computed harmonic frequencies (bold: absolute and normal: scaled) and intensities of **1E-C1-s**, **1E-C2-s** (blue) and **1E-C3-s** (green) at M06-2X/cc-pVTZ level of theory along with the experimental frequency and intensity of the deposited **HPIA** (Ar matrix, 4 K).

| Normal Mode | Symmetry | Computed                                                |                                                         |                                                         |           | Experimental (Ar, 4 K)                                                                 |           | Tentative Assignments                                                                                                                                 |
|-------------|----------|---------------------------------------------------------|---------------------------------------------------------|---------------------------------------------------------|-----------|----------------------------------------------------------------------------------------|-----------|-------------------------------------------------------------------------------------------------------------------------------------------------------|
|             |          | $\bar{\nu}_{cal}$ (cm <sup>-1</sup> )<br><b>1E-C1-s</b> | $\bar{\nu}_{cal}$ (cm <sup>-1</sup> )<br><b>1E-C2-s</b> | $\bar{\nu}_{cal}$ (cm <sup>-1</sup> )<br><b>1E-C3-s</b> | $I_{rel}$ | $\bar{\nu}$ (cm <sup>-1</sup> )                                                        | $I_{rel}$ |                                                                                                                                                       |
| 75          | A        |                                                         |                                                         | <b>3759.6</b> , 3646.8                                  | 49        | 3484.0                                                                                 | 2         | v(OH)                                                                                                                                                 |
| 75          | A+ A'    | <b>3434.5</b> , 3331.5                                  | <b>3401.7</b> , 3299.7                                  |                                                         | 100       | 3072.0<br>3041.5<br>3007.5<br>2987.5<br>2974.5<br>2944.5<br>2936.5<br>2921.0<br>2864.0 | br        | v(OH)                                                                                                                                                 |
| 64          | A        | <b>1706.1</b> , 1654.9                                  |                                                         |                                                         | 90        | 1627.0                                                                                 | 100       | v <sub>ph</sub> (CC)+δ <sub>ph</sub> (CH)+δ(OH)+δ <sub>ph</sub> (NNC)+<br>v <sub>iso</sub> (CC)+v <sub>iso</sub> (CN)                                 |
| 64          | A'       |                                                         | <b>1696.6</b> , 1645.7                                  |                                                         | 21        | 1623.5                                                                                 | o         | v <sub>ph</sub> (CC)+δ(OH)+ δ <sub>ph</sub> (CH)                                                                                                      |
| 63          | A        |                                                         |                                                         | <b>1693.8</b> , 1643.0                                  | 51        | 1621.0                                                                                 | o         | v <sub>ph</sub> (CC)+v <sub>iso</sub> (CC)+<br>v <sub>iso</sub> (CN)+v(NN)+δ <sub>iso</sub> (CH <sub>3</sub> )+δ <sub>iso</sub> (CNN <sub>azo</sub> ) |
| 63          | A'       |                                                         | <b>1684.0</b> , 1633.5                                  |                                                         | 53        | 1613.0                                                                                 | 29        | v <sub>ph</sub> (CC) + v <sub>iso</sub> (CC)<br>+v <sub>iso</sub> (CN)+v(NN)+δ <sub>iso</sub> (CH <sub>3</sub> )+δ(OH)                                |
| 63          | A        | <b>1694.4</b> , 1643.6                                  |                                                         |                                                         | 4         | 1608.0                                                                                 | 19        | v <sub>ph</sub> (CC) + v <sub>iso</sub> (CC)+δ(OH)+ δ <sub>ph</sub> (CH)                                                                              |
| 62          | A        |                                                         |                                                         | <b>1669.4</b> , 1619.4                                  | 42        | 1599                                                                                   | 7         | v <sub>ph</sub> (CC)+δ(OH)+ δ <sub>ph</sub> (CH)                                                                                                      |
| 62          | A        | <b>1659.6</b> , 1609.8                                  |                                                         |                                                         | 15        | 1595.0                                                                                 | 31        | v <sub>ph</sub> (CC)+δ <sub>ph</sub> (CH)+δ(OH)+v(NN)                                                                                                 |
| 61+62       | A        | <b>1608.2</b> , 1560.0                                  | <b>1654.2</b> , 1604.6                                  |                                                         | 10+<br>43 | 1585.5                                                                                 | 27<br>o   | v(NN)+ δ(OH)+δ <sub>ph</sub> (CH)+ v <sub>iso</sub> (CN)<br>δ(OH)+ v <sub>ph</sub> (CC)+ δ <sub>ph</sub> (CH)+ v <sub>iso</sub> (CC)                  |
| 60          | A        | <b>1601.2</b> , 1553.2                                  |                                                         |                                                         | 2         | 1573.0                                                                                 | 5         | v <sub>iso</sub> (CN)+ v <sub>iso</sub> (CCH <sub>3</sub> )+ δ <sub>iso</sub> (CH <sub>3</sub> )+ v <sub>azo</sub> (NN)                               |
| 59          | A        | <b>1537.1</b> , 1491.0                                  |                                                         |                                                         | 8         | 1515.3                                                                                 | <5        | δ <sub>ph</sub> (CH)+δ(OH)                                                                                                                            |
| 59          | A        |                                                         |                                                         | <b>1537.0</b> , 1490.9                                  |           | 1500.5                                                                                 | <5        | v <sub>ph</sub> (CC)+δ <sub>ph</sub> (CH)+δ(OH)+ v <sub>ph</sub> (CO)                                                                                 |

|          |        |                |                |              |          |        |    |                                                                                          |
|----------|--------|----------------|----------------|--------------|----------|--------|----|------------------------------------------------------------------------------------------|
| 58       | A      | 1518.6, 1473.0 |                |              | 23       | 1487.0 | 73 | $v_{ph}(CC)+\delta_{ph}(CH)+v(NN)+v_{ph}(CO)$                                            |
| 58       | A'     |                | 1525.4, 1479.7 |              | 35       | 1481.5 | 21 | $\delta_{ph}(CH)+v_{iso}(CC)+\delta(OH)+\delta_{iso}(CH_3)$                              |
| 57       | A'     |                | 1512.8, 1467.4 |              | 16       | 1477.0 | 18 | $v_{ph}(CC)+\delta_{ph}(CH)+v(NN)+v_{ph}(CO)+\delta_{iso}(CH_3)$                         |
| 57       | A      | 1502.7, 1457.6 |                |              | 12       | 1453.5 | 25 | $v_{iso}(CC)+\delta_{iso}(CH_3)$                                                         |
| 56       | A      | 1480.7, 1436.3 |                |              | 2        | 1436.0 | 5  | $\delta_{iso}(CH_3)+v_{iso}(CN_{azo})+v_{iso}(CC)$                                       |
| 53       | A'     |                | 1473.2, 1429.0 |              | 15       | 1421.0 | 47 | $\delta_{iso}(CH_3)$                                                                     |
| 53       | A      | 1468.6, 1424.5 |                |              | 27       | 1419.0 | 49 | $v_{ph}(CC)+v_{iso}(CC)+\delta_{iso}(CH_3)+\delta(OH)+\delta_{ph}(CH)$                   |
| 52       | A      | 1427.4, 1384.6 |                |              | 16       | 1385.0 | 19 | $v_{ph}(CC)+\delta_{ph}(CH)+\delta(OH)$                                                  |
| 51       | A      | 1421.5, 1378.9 |                |              | 2        | 1382.0 | 8  | $\delta_{iso}(CH_3)$                                                                     |
| 51       | A'     |                | 1421.4, 1378.8 |              | 21       | 1361.0 | 16 | $\delta_{ph}(CH)+\delta(OH)+\delta_{iso}(CH_3)$                                          |
| 49       | A      | 1421.5, 1378.9 |                |              | 1        | 1321.5 | 5  | $\delta_{ph}(CH)$                                                                        |
| 48       | A      | 1340.3, 1300.1 |                |              | 16       | 1290.0 | 22 | $\delta_{iso}(CH_3)+v_{iso}(ring)$                                                       |
| 47       | A'     |                | 1329.8, 1289.9 |              | 25       | 1281.5 | 50 | $v_{ph}(CO)+v_{ph}(CC)+\delta_{ph}(CH)+\delta(OH)$                                       |
| 47       | A      | 1330.7, 1290.8 |                |              | 17       | 1279.0 | 55 | $v_{ph}(CO)+v_{ph}(CC)+\delta_{ph}(CH)+\delta(OH)$                                       |
| 46       | A      | 1314.0, 1274.6 |                |              | 9        | 1258.0 | 28 | $v_{ph}(CN_{azo})+v_{iso}(CN_{azo})\delta(OH)+\delta_{ph}(CH)+\delta_{iso}(CH_3)$        |
| 46       | A      |                | 1297.1, 1258.2 |              | 34       | 1251.5 | 12 | $v_{ph}(CC)+v_{iso}(CC)+v_{ph}(CO)+\delta(OH)+\delta_{ph}(CH)$                           |
| 45       | A'     |                | 1263.8, 1225.9 |              | 15       | 1233.5 | 15 | $v_{ph}(CN_{ahzo})+v_{iso}(CN_{azo})+\delta(OH)+\delta_{ph}(CH)$                         |
| 45       | A      | 1264.5, 1226.6 |                |              | 14       | 1220.0 | 36 | $v_{iso}(CN_{azo})+\delta(OH)+\delta_{ph}(CH)$                                           |
| 44+44    | A+A'   | 1233.5, 1196.5 | 1231.7, 1194.7 |              | 19+19    | 1198.0 | 44 | $v_{ph}(CN_{azo})+\delta(OH)+\delta_{ph}(CH)+v_{ph}(CC)$                                 |
| 43+43    | A+A'   | 1173.5, 1138.3 | 1168.5, 1133.4 |              | 8+9      | 1149.0 | 31 | $\delta_{ph}(CH)$                                                                        |
| 42       | A      | 1147.7, 1113.3 |                |              |          | 1114.0 | <5 | $\delta_{ph}(CH)$                                                                        |
| 41+41    | A+A'   | 1097.9, 1064.9 | 1097.3, 1064.4 |              | 7+11     | 1062.5 | 21 | $v_{iso}(C-CH_3)+\delta_{ph}(CH)+\delta_{iso}(CH_3)+\delta_{ph}(ring)+\delta_{iso}(CCO)$ |
| 40       | A      | 1068.4, 1036.3 |                |              | 2        | 1031.0 | 10 | $\delta_{ph}(CH)$                                                                        |
| 37+36    | A+A'   | 1042.8, 1011.6 | 1016.1, 985.6  |              | 6+13     | 981.5  | 30 | $v_{iso}(CH_3)+v_{iso}(ON)$                                                              |
| 36       | A      | 1035.2, 1004.2 |                |              | 5        | 973.5  | 13 | $\delta_{iso}(CH_3)+\delta_{iso}(ring)$                                                  |
| 34       | A      | 986.9, 957.3   |                |              | 1        | 943.5  | 5  | $\gamma_{ph}(CH)$                                                                        |
| 33       | A      | 954.3, 925.9   |                |              | 1        | 927.5  | 5  | $\delta_{iso}(CH_3)+v_{iso}(ON)$                                                         |
| 30       | A'     |                | 861.4, 835.5   |              | 8        | 838.0  | 15 | $\tau_{iso}(CN_{azo})+\tau_{iso}(CH_3)+\tau_{ph}(ring)$                                  |
| 30       | A      | 852.6, 827.0   |                |              | 8        | 830.0  | 38 | $\delta_{ph}(ring)+\delta_{ph}(CH)+v_{ph}(CO)+\delta(NN)+v_{iso}(CC)$                    |
| 29       | A      | 793.5, 769.7   |                |              | 17       | 756.5  | 93 | $\gamma(OH)+\gamma_{iso}(CH_3)+\gamma_{iso}(ring)+\gamma_{ph}(CH)$                       |
| 26+27+29 | A+A'+A | 775.4, 752.1   | 784.4, 760.9   | 789.3, 765.6 | 12+38+19 | 754.5  | 98 | $\gamma_{ph}(CH)+\gamma_{ph}(CN_{azo})+\gamma(OH)$                                       |
| 25       | A      | 742.4, 720.1   |                |              | 8        | 751.0  | 46 | $\gamma_{ph}(CH)+\gamma(OH)+\gamma_{iso}(CH_3)+\gamma_{iso}(ring)$                       |
| 24       | A      | 714.5, 693.1   |                |              | 8        | 690.0  | 11 | $\delta_{ph}(ring)+\delta_{iso}(ring)$                                                   |

|    |    |                      |                      |  |    |       |    |                                                                                                                                                                                           |
|----|----|----------------------|----------------------|--|----|-------|----|-------------------------------------------------------------------------------------------------------------------------------------------------------------------------------------------|
| 22 | A  | <b>636.2</b> , 617.1 |                      |  | 6  | 619.5 | 17 | $\delta_{\text{ph}}(\text{ring})+\delta_{\text{iso}}(\text{ring})$                                                                                                                        |
| 21 | A  | <b>594.3</b> , 576.4 |                      |  | 2  | 580.0 | 16 | $\tau(\text{OH})+\tau_{\text{iso}}(\text{CH}_3)+\tau_{\text{ph}}(\text{ring})$                                                                                                            |
| 22 | A  |                      | <b>599.4</b> , 581.4 |  | 21 | 576.5 | 7  | $\gamma(\text{OH})$                                                                                                                                                                       |
| 20 | A' |                      | <b>583.5</b> , 566.0 |  | 14 | 568.5 | 15 | $\nu_{\text{iso}}(\text{CH}_3)+\delta_{\text{iso}}(\text{ring})+\underline{\tau}(\text{CNNC})+\underline{\tau}_{\text{ph}}(\text{ring})$                                                  |
| 19 | A  | <b>573.6</b> , 556.4 |                      |  | 9  | 559.0 | 34 | $\underline{\tau}_{\text{ph}}(\text{ring})+\delta_{\text{iso}}(\text{ring})+\delta_{\text{ph}}(\text{N}_{\text{azo}}\text{CC})+\underline{\tau}(\text{OH})+\underline{\tau}(\text{CNNC})$ |
| 17 | A  | <b>500.8</b> , 485.8 |                      |  | 2  | 486.0 | 5  | $\gamma_{\text{ph}}(\text{CH})+\gamma_{\text{ph}}(\text{CN}_{\text{azo}})$                                                                                                                |
| 16 | A  | <b>447.9</b> , 434.5 |                      |  | 3  | 438.0 | 9  | $\underline{\tau}_{\text{ph}}(\text{ring})+\underline{\tau}_{\text{iso}}(\text{ring})+\underline{\tau}(\text{CNNC})$                                                                      |

br - broad; o - overlap; v - stretching;  $\delta$  - in-plane-bending;  $\gamma$  - out-of-plane bending;  $\tau$  – torsion; Scaling factor used: 0.97 below 2000  $\text{cm}^{-1}$  and 0.95 above 2000  $\text{cm}^{-1}$ .

**Table S3.** Computed harmonic frequencies and intensities of **1E-C1-s**, **1E-C2-s** (blue) and **1E-C3-s** (green) at  $\omega\text{B97X-D}/\text{def2tzvp}$  level of theory (unscaled) along with the experimental frequency and intensity of the deposited **HPIA** (Ar matrix, 4 K)

| Normal Mode | Symmetry | Computed                                                        |                                                                 |                                                                 |                  | Experimental (Ar, 4 K)                                                                 |                  | Tentative Assignments                                                                                                                                                             |
|-------------|----------|-----------------------------------------------------------------|-----------------------------------------------------------------|-----------------------------------------------------------------|------------------|----------------------------------------------------------------------------------------|------------------|-----------------------------------------------------------------------------------------------------------------------------------------------------------------------------------|
|             |          | $\bar{\nu}_{\text{cal}}$ ( $\text{cm}^{-1}$ )<br><b>1E-C1-s</b> | $\bar{\nu}_{\text{cal}}$ ( $\text{cm}^{-1}$ )<br><b>1E-C2-s</b> | $\bar{\nu}_{\text{cal}}$ ( $\text{cm}^{-1}$ )<br><b>1E-C3-s</b> | $I_{\text{rel}}$ | $\bar{\nu}$ ( $\text{cm}^{-1}$ )                                                       | $I_{\text{rel}}$ |                                                                                                                                                                                   |
| 75          | A        |                                                                 |                                                                 | 3742.9                                                          | 53               | 3484.0                                                                                 | 2                | $\nu(\text{OH})$                                                                                                                                                                  |
| 75          | A        | 3445.2                                                          | 3420.6                                                          |                                                                 | 100              | 3072.0<br>3041.5<br>3007.5<br>2987.5<br>2974.5<br>2944.5<br>2936.5<br>2921.0<br>2864.0 | br               | $\nu(\text{OH})$                                                                                                                                                                  |
| 64          | A        | 1697.2                                                          |                                                                 |                                                                 | 82               | 1627.0                                                                                 | 100              | $\nu_{\text{ph}}(\text{CC})+\delta_{\text{ph}}(\text{CH})+\delta(\text{OH})+\delta_{\text{ph}}(\text{NNC})+\nu_{\text{iso}}(\text{CC})+\nu_{\text{iso}}(\text{CN})$               |
| 63          | A'       |                                                                 | 1669.5                                                          |                                                                 | 42               | 1613.0                                                                                 | 29               | $\nu_{\text{ph}}(\text{CC})+\nu_{\text{iso}}(\text{CC})+\nu_{\text{iso}}(\text{CN})+\nu(\text{NN})+\delta_{\text{iso}}(\text{CH}_3)+\delta(\text{OH})$                            |
| 63          | A        |                                                                 |                                                                 | 1681.7                                                          | 56               | 1608.0                                                                                 | 19               | $\nu_{\text{ph}}(\text{CC})+\nu_{\text{iso}}(\text{CC})+\nu_{\text{iso}}(\text{CN})+\nu(\text{NN})+\delta_{\text{iso}}(\text{CH}_3)+\delta_{\text{iso}}(\text{CNN}_{\text{azo}})$ |
| 62          | A        | 1657.7                                                          |                                                                 |                                                                 | 20               | 1595.0                                                                                 | 31               | $\nu_{\text{ph}}(\text{CC})+\delta_{\text{ph}}(\text{CH})+\delta(\text{OH})+\nu(\text{NN})$                                                                                       |
| 61+62       | A        | 1593.7                                                          | 1649.5                                                          |                                                                 | 12+69            | 1585.5                                                                                 | 27               |                                                                                                                                                                                   |
| 58          | A        | 1517.6                                                          |                                                                 |                                                                 | 15               | 1487.0                                                                                 | 73               | $\nu_{\text{ph}}(\text{CC})+\delta_{\text{ph}}(\text{CH})+\nu(\text{NN})+\nu_{\text{ph}}(\text{CO})$                                                                              |

|            |             |        |        |        |              |        |    |                                                                                                                                                                                 |
|------------|-------------|--------|--------|--------|--------------|--------|----|---------------------------------------------------------------------------------------------------------------------------------------------------------------------------------|
| 57         | A           | 1505.5 |        |        | 24           | 1481.5 | 21 | $\nu_{\text{iso}}(\text{CC}) + \delta_{\text{iso}}(\text{CH}_3)$                                                                                                                |
| 53         | A           | 1474.3 |        |        | 27           | 1453.5 | 25 | $\nu_{\text{iso}}(\text{CC}) + \delta_{\text{iso}}(\text{CH}_3)$                                                                                                                |
| 58         | A'          |        | 1527.7 |        | 47           | 1419.5 | 49 | $\nu_{\text{ph}}(\text{CC}) + \nu_{\text{iso}}(\text{CC}) + \delta_{\text{iso}}(\text{CH}_3) + \delta(\text{OH}) + \delta_{\text{ph}}(\text{CH})$                               |
| 52         | A           | 1448.6 |        |        | 19           | 1385.0 | 19 | $\nu_{\text{ph}}(\text{CC}) + \delta_{\text{ph}}(\text{CH}) + \delta(\text{OH})$                                                                                                |
| 51         | A           |        | 1425.3 |        | 6            | 1361.0 | 16 | $\delta_{\text{ph}}(\text{CH}) + \delta(\text{OH}) + \delta_{\text{iso}}(\text{CH}_3)$                                                                                          |
| 49         | A           | 1362.4 |        |        | 1            | 1321.5 | 5  | $\delta_{\text{ph}}(\text{CH})$                                                                                                                                                 |
| 48         | A           | 1342.2 |        |        | 15           | 1290.0 | 22 | $\delta_{\text{iso}}(\text{CH}_3) + \nu_{\text{iso}}(\text{ring})$                                                                                                              |
| 47         | A           |        | 1334.6 |        | 27           | 1281.5 | 50 | $\nu_{\text{ph}}(\text{CO}) + \nu_{\text{ph}}(\text{CC}) + \delta_{\text{ph}}(\text{CH}) + \delta(\text{OH})$                                                                   |
| 47         | A           | 1333.5 |        |        | 20           | 1279.0 | 55 | $\nu_{\text{ph}}(\text{CO}) + \nu_{\text{ph}}(\text{CC}) + \delta_{\text{ph}}(\text{CH}) + \delta(\text{OH})$                                                                   |
| 46         | A           | 1315.9 |        |        | 4            | 1258.0 | 28 | $\nu_{\text{ph}}(\text{CN}_{\text{azo}}) + \nu_{\text{iso}}(\text{CN}_{\text{azo}}) + \delta(\text{OH}) + \delta_{\text{ph}}(\text{CH}) + \delta_{\text{iso}}(\text{CH}_3)$     |
| 46         | A           |        |        | 1297.4 | 41           | 1251.5 | 12 | $\nu_{\text{ph}}(\text{CC}) + \nu_{\text{iso}}(\text{CC}) + \nu_{\text{ph}}(\text{CO}) + \delta(\text{OH}) + \delta_{\text{ph}}(\text{CH})$                                     |
| 45         | A           |        | 1270.4 |        | 21           | 1233.5 | 15 | $\nu_{\text{ph}}(\text{CN}_{\text{ahzo}}) + \nu_{\text{iso}}(\text{CN}_{\text{azo}}) + \delta(\text{OH}) + \delta_{\text{ph}}(\text{CH})$                                       |
| 45         | A           | 1272.0 |        |        | 18           | 1220.0 | 36 | $\nu_{\text{iso}}(\text{CN}_{\text{azo}}) + \delta(\text{OH}) + \delta_{\text{ph}}(\text{CH})$                                                                                  |
| 44         | A           | 1237.2 |        |        | 23           | 1198.0 | 44 | $\nu_{\text{ph}}(\text{CN}_{\text{azo}}) + \delta(\text{OH}) + \delta_{\text{ph}}(\text{CH}) + \nu_{\text{ph}}(\text{CC})$                                                      |
| 43         | A           | 1181.2 |        |        | 11           | 1149.0 | 31 | $\delta_{\text{ph}}(\text{CH})$                                                                                                                                                 |
| 41         | A           | 1097.6 |        |        | 9            | 1062.5 | 21 | $\nu_{\text{iso}}(\text{C}-\text{CH}_3) + \delta_{\text{ph}}(\text{CH}) + \delta_{\text{iso}}(\text{CH}_3) + \delta_{\text{ph}}(\text{ring}) + \delta_{\text{iso}}(\text{CCO})$ |
| 40         | A           | 1072.0 |        |        | 1            | 1031.0 | 10 | $\delta_{\text{ph}}(\text{CH})$                                                                                                                                                 |
| 37         | A           | 1051.4 |        |        | 3            | 981.5  | 30 | $\gamma_{\text{iso}}(\text{CH}_3) + \nu_{\text{iso}}(\text{ON})$                                                                                                                |
| 36         | A           | 1029.6 |        |        | 10           | 973.5  | 13 | $\delta_{\text{iso}}(\text{CH}_3) + \delta_{\text{iso}}(\text{ring})$                                                                                                           |
| 30         | A           |        | 865.5  |        | 10           | 838.0  | 15 | $\tau_{\text{iso}}(\text{CN}_{\text{azo}}) + \tau_{\text{iso}}(\text{CH}_3) + \tau_{\text{ph}}(\text{ring})$                                                                    |
| 30         | A           | 857.3  |        |        | 10           | 830.0  | 38 | $\delta_{\text{ph}}(\text{ring}) + \delta_{\text{ph}}(\text{CH}) + \nu_{\text{ph}}(\text{CO}) + \delta(\text{NN}) + \nu_{\text{iso}}(\text{CC})$                                |
| 29         | A           | 794.8  |        |        | 3            | 756.5  | 93 | $\gamma(\text{OH}) + \gamma_{\text{iso}}(\text{CH}_3) + \gamma_{\text{iso}}(\text{ring}) + \gamma_{\text{ph}}(\text{CH})$                                                       |
| 27+ 27+ 28 | A + A'' + A | 778.1  | 779.7  | 780.6  | 41 + 23 + 13 | 754.5  | 98 | $\gamma_{\text{ph}}(\text{CH}) + \gamma_{\text{ph}}(\text{CN}_{\text{azo}}) + \gamma(\text{OH})$                                                                                |
| 24         | A           | 722.6  |        |        | 4            | 690.0  | 11 | $\delta_{\text{ph}}(\text{ring}) + \delta_{\text{iso}}(\text{ring})$                                                                                                            |
| 22         | A           | 636.8  |        |        | 8            | 619.5  | 17 | $\delta_{\text{ph}}(\text{ring}) + \delta_{\text{iso}}(\text{ring})$                                                                                                            |
| 22         | A           |        |        | 612.4  | 23           | 580.0  | 16 | $\gamma(\text{OH})$                                                                                                                                                             |
| 20         | A'          |        | 584.9  |        | 15           | 568.5  | 15 | $\gamma_{\text{iso}}(\text{CH}_3) + \delta_{\text{iso}}(\text{ring}) + \tau(\text{CN}_{\text{NC}}) + \tau_{\text{ph}}(\text{ring})$                                             |
| 19         | A           | 575.6  |        |        | 11           | 559.0  | 34 | $\tau_{\text{ph}}(\text{ring}) + \delta_{\text{iso}}(\text{ring}) + \delta_{\text{ph}}(\text{N}_{\text{azo}}\text{CC}) + \tau(\text{OH}) + \tau(\text{CN}_{\text{NC}})$         |
| 17         | A           | 503.0  |        |        | 2            | 486.0  | 5  | $\gamma_{\text{ph}}(\text{CH}) + \gamma_{\text{ph}}(\text{CN}_{\text{azo}})$                                                                                                    |
| 16         | A           | 459.5  |        |        | 3            | 438.0  | 9  | $\tau_{\text{ph}}(\text{ring}) + \tau_{\text{iso}}(\text{ring}) + \tau(\text{CN}_{\text{NC}})$                                                                                  |

br - broad; o - overlap; v - stretching;  $\delta$  - in-plane-bending;  $\gamma$  - out-of-plane bending;  $\tau$  - torsion.

**Table S4.** Computed harmonic frequencies and intensities of the three most abundant conformers of *E*-HPAI (M06-2X/cc-pVTZ level of theory, unscaled)

| Mode | 1E-C1-s  |                                |                  |                  | 1E-C2-s  |                                |                  |                  | 1E-C3-s  |                                |                  |                  |
|------|----------|--------------------------------|------------------|------------------|----------|--------------------------------|------------------|------------------|----------|--------------------------------|------------------|------------------|
|      | Symmetry | Wavenumber (cm <sup>-1</sup> ) | I <sub>abs</sub> | I <sub>rel</sub> | Symmetry | Wavenumber (cm <sup>-1</sup> ) | I <sub>abs</sub> | I <sub>rel</sub> | Symmetry | Wavenumber (cm <sup>-1</sup> ) | I <sub>abs</sub> | I <sub>rel</sub> |
| 16   | A        | 447.9                          | 7.3              | 3                | A'       | 450.8                          | 7.8              | 3                | A        | 496.2                          | 10.8             | 7                |
| 17   | A        | 500.8                          | 5.1              | 2                | A''      | 506.2                          | 4.1              | 2                | A        | 497.8                          | 12.4             | 8                |
| 18   | A        | 544.6                          | 0.5              | 0                | A'       | 537.2                          | 0                | 0                | A        | 521.1                          | 18.6             | 13               |
| 19   | A        | 573.6                          | 26.7             | 9                | A''      | 578.8                          | 2.3              | 1                | A        | 571.6                          | 1                | 1                |
| 20   | A        | 580.2                          | 2.6              | 1                | A'       | 583.5                          | 40.1             | 15               | A        | 580.8                          | 17.7             | 12               |
| 21   | A        | 594.3                          | 6.2              | 2                | A'       | 589.9                          | 4.2              | 2                | A        | 593.5                          | 3.4              | 2                |
| 22   | A        | 636.2                          | 16.9             | 6                | A'       | 637.9                          | 14.4             | 5                | A        | 599.4                          | 60               | 41               |
| 23   | A        | 648.5                          | 0.3              | 0                | A''      | 658.6                          | 0                | 0                | A        | 626.5                          | 7.9              | 5                |
| 24   | A        | 714.5                          | 24               | 8                | A''      | 726.1                          | 7.7              | 3                | A        | 652.6                          | 0.8              | 1                |
| 25   | A        | 742.4                          | 22.6             | 8                | A''      | 766.8                          | 6.9              | 3                | A        | 724.6                          | 2.3              | 2                |
| 26   | A        | 775.4                          | 34.1             | 12               | A'       | 779.5                          | 4.6              | 2                | A        | 772.3                          | 12.4             | 8                |
| 27   | A        | 778                            | 6.2              | 2                | A''      | 784.4                          | 111.1            | 41               | A        | 781.2                          | 17.7             | 12               |
| 28   | A        | 790.1                          | 2.2              | 1                | A'       | 786.2                          | 3.6              | 1                | A        | 783.5                          | 5                | 3                |
| 29   | A        | 793.5                          | 49.6             | 17               | A''      | 796.4                          | 4.6              | 2                | A        | 789.3                          | 54.4             | 37               |
| 30   | A        | 852.6                          | 23.8             | 8                | A'       | 861.4                          | 22.9             | 8                | A        | 863.6                          | 11.7             | 8                |
| 31   | A        | 892.6                          | 1.3              | 0                | A''      | 899.9                          | 0.9              | 0                | A        | 892.6                          | 1.4              | 1                |
| 32   | A        | 935                            | 0.2              | 0                | A'       | 948.9                          | 4.2              | 2                | A        | 918.6                          | 3.1              | 2                |
| 33   | A        | 954.5                          | 2.2              | 1                | A'       | 978.1                          | 15.1             | 6                | A        | 952.2                          | 0.7              | 0                |
| 34   | A        | 986.9                          | 1.6              | 1                | A''      | 992.3                          | 3.5              | 1                | A        | 989.2                          | 1.5              | 1                |
| 35   | A        | 1018.9                         | 0.2              | 0                | A''      | 1012.6                         | 0.1              | 0                | A        | 1017.4                         | 0.1              | 0                |
| 36   | A        | 1035.2                         | 13.8             | 5                | A'       | 1016.1                         | 36.5             | 13               | A        | 1035.2                         | 17.6             | 12               |
| 37   | A        | 1042.8                         | 17.8             | 6                | A'       | 1042.3                         | 7.4              | 3                | A        | 1039                           | 13.7             | 9                |
| 38   | A        | 1061.4                         | 0.2              | 0                | A''      | 1061                           | 1.5              | 1                | A        | 1064.4                         | 8.4              | 6                |
| 39   | A        | 1065.5                         | 3.5              | 1                | A'       | 1065.6                         | 4.6              | 2                | A        | 1064.5                         | 0.2              | 0                |
| 40   | A        | 1068.4                         | 4.8              | 2                | A''      | 1077                           | 2.3              | 1                | A        | 1069.3                         | 2.9              | 2                |
| 41   | A        | 1097.9                         | 21.4             | 7                | A'       | 1097.3                         | 30.2             | 11               | A        | 1098.5                         | 30.7             | 21               |
| 42   | A        | 1147.7                         | 2.5              | 1                | A'       | 1146.8                         | 2.3              | 1                | A        | 1133.8                         | 1.2              | 1                |

|     |   |        |       |    |     |        |       |    |   |        |       |     |
|-----|---|--------|-------|----|-----|--------|-------|----|---|--------|-------|-----|
| 43  | A | 1173.5 | 23.8  | 8  | A'  | 1168.5 | 24.2  | 9  | A | 1171.9 | 32.7  | 22  |
| 44  | A | 1233.5 | 55.3  | 19 | A'  | 1231.7 | 52.4  | 19 | A | 1212   | 47.4  | 32  |
| 45  | A | 1264.5 | 39.4  | 14 | A'  | 1263.8 | 41.2  | 15 | A | 1257   | 48.5  | 33  |
| 46  | A | 1314   | 25.1  | 9  | A'  | 1310.5 | 27    | 10 | A | 1297.1 | 97.5  | 66  |
| 47  | A | 1330.7 | 49.8  | 17 | A'  | 1329.8 | 68.9  | 25 | A | 1317.6 | 49.8  | 34  |
| 48  | A | 1340.3 | 46.1  | 16 | A'  | 1339.5 | 21.8  | 8  | A | 1343.5 | 28    | 19  |
| 49  | A | 1361.1 | 2.3   | 1  | A'  | 1360   | 2.8   | 1  | A | 1351.8 | 71.7  | 48  |
| 50  | A | 1406.2 | 3.9   | 1  | A'  | 1410.5 | 0.2   | 0  | A | 1378.6 | 29.7  | 20  |
| 51  | A | 1421.5 | 4.9   | 2  | A'  | 1421.4 | 58.6  | 21 | A | 1401.7 | 1.9   | 1   |
| 52  | A | 1427.4 | 45.1  | 15 | A'  | 1424   | 15.7  | 6  | A | 1417.8 | 8     | 5   |
| 53  | A | 1468.6 | 78    | 27 | A'  | 1473.2 | 42.3  | 15 | A | 1469.2 | 105.1 | 71  |
| 54  | A | 1474.3 | 8     | 3  | A'' | 1473.2 | 11.2  | 4  | A | 1475.7 | 7.1   | 5   |
| 55  | A | 1477.2 | 8.9   | 3  | A'  | 1487.2 | 8.3   | 3  | A | 1480.2 | 9.2   | 6   |
| 56  | A | 1480.7 | 6.5   | 2  | A'' | 1489.3 | 9.3   | 3  | A | 1483.9 | 7.5   | 5   |
| 57  | A | 1502.7 | 34.9  | 12 | A'  | 1512.8 | 43.8  | 16 | A | 1501.4 | 37    | 25  |
| 58  | A | 1518.6 | 68.2  | 23 | A'  | 1525.4 | 95.5  | 35 | A | 1523.8 | 8.2   | 6   |
| 59  | A | 1537.1 | 22.4  | 8  | A'  | 1539.9 | 13    | 5  | A | 1537   | 77.6  | 52  |
| 60  | A | 1601.2 | 6.8   | 2  | A'  | 1587.1 | 24    | 9  | A | 1600.8 | 15.3  | 10  |
| 61  | A | 1608.2 | 27.9  | 10 | A'  | 1595.2 | 20.9  | 8  | A | 1635.3 | 10.5  | 7   |
| 62  | A | 1659.6 | 42.6  | 15 | A'  | 1654.2 | 116.8 | 43 | A | 1669.4 | 61.8  | 42  |
| 63  | A | 1694.4 | 12.5  | 4  | A'  | 1684   | 153.9 | 56 | A | 1693.8 | 147.8 | 100 |
| 64  | A | 1706.1 | 260.7 | 90 | A'  | 1696.6 | 58.5  | 21 | A | 1695.5 | 91.7  | 62  |
| 65  | A | 3063.5 | 4.9   | 2  | A'  | 3074.5 | 5.2   | 2  | A | 3055.6 | 5     | 3   |
| 66  | A | 3064.2 | 3.3   | 1  | A'  | 3075.8 | 1.7   | 1  | A | 3065.3 | 5.8   | 4   |
| 67  | A | 3129.5 | 1.1   | 0  | A'' | 3138.4 | 3.7   | 1  | A | 3123.8 | 3.5   | 2   |
| s68 | A | 3132.6 | 2.8   | 1  | A'' | 3139.1 | 0.9   | 0  | A | 3132.9 | 1.6   | 1   |
| 69  | A | 3156.1 | 6.9   | 2  | A'  | 3170   | 4.2   | 2  | A | 3150.2 | 6.2   | 4   |
| 70  | A | 3164.8 | 2.3   | 1  | A'  | 3174   | 6.8   | 2  | A | 3163.4 | 0.7   | 0   |
| 71  | A | 3186.4 | 0.7   | 0  | A'  | 3179.5 | 1.7   | 1  | A | 3194.7 | 0.7   | 0   |
| 72  | A | 3193   | 1.2   | 0  | A'  | 3206.6 | 0.6   | 0  | A | 3201.9 | 1.2   | 1   |
| 73  | A | 3207.6 | 3.9   | 1  | A'  | 3220.7 | 2.6   | 1  | A | 3209.8 | 1.4   | 1   |

|    |   |        |       |     |    |        |       |     |   |        |      |    |
|----|---|--------|-------|-----|----|--------|-------|-----|---|--------|------|----|
| 74 | A | 3228.9 | 6.9   | 2   | A' | 3226.9 | 6.8   | 2   | A | 3220.9 | 11.1 | 8  |
| 75 | A | 3434.5 | 290.6 | 100 | A' | 3401.7 | 274.5 | 100 | A | 3759.6 | 143  | 97 |

**Table S5.** Computed harmonic frequencies and intensities of the three most abundant conformers of **Z-HPAI** (M06-2X/cc-pVTZ level of theory, unscaled)

| Mode | <b>1Z-C3-s</b> |                                |                  |                  | <b>1Z-C4-s</b> |                                |                  |                  | <b>1Z-C1-s</b> |                                |                  |                  |
|------|----------------|--------------------------------|------------------|------------------|----------------|--------------------------------|------------------|------------------|----------------|--------------------------------|------------------|------------------|
|      | Symmetry       | Wavenumber (cm <sup>-1</sup> ) | I <sub>abs</sub> | I <sub>rel</sub> | Symmetry       | Wavenumber (cm <sup>-1</sup> ) | I <sub>abs</sub> | I <sub>rel</sub> | Symmetry       | Wavenumber (cm <sup>-1</sup> ) | I <sub>abs</sub> | I <sub>rel</sub> |
| 16   | A              | 495                            | 4.8              | 4                | A              | 491.9                          | 3.1              | 3                | A              | 438.9                          | 34               | 33               |
| 17   | A              | 525.1                          | 10               | 8                | A              | 525.5                          | 26.2             | 24               | A              | 487.2                          | 8.4              | 8                |
| 18   | A              | 538.5                          | 36.6             | 30               | A              | 536.6                          | 16.9             | 15               | A              | 514.6                          | 0.6              | 1                |
| 19   | A              | 564.2                          | 33.5             | 28               | A              | 559.9                          | 42.9             | 39               | A              | 541                            | 24.6             | 24               |
| 20   | A              | 571.5                          | 42.3             | 35               | A              | 568.5                          | 35.5             | 32               | A              | 575.3                          | 1.7              | 2                |
| 21   | A              | 581.4                          | 1.1              | 1                | A              | 587.5                          | 3.8              | 3                | A              | 588.2                          | 2.8              | 3                |
| 22   | A              | 619.3                          | 0.4              | 0                | A              | 619.8                          | 2.9              | 3                | A              | 622.8                          | 6.6              | 6                |
| 23   | A              | 641.8                          | 7.1              | 6                | A              | 647.1                          | 5.8              | 5                | A              | 642.6                          | 8.9              | 9                |
| 24   | A              | 668.2                          | 2.8              | 2                | A              | 673.4                          | 2.6              | 2                | A              | 659.7                          | 2.8              | 3                |
| 25   | A              | 708.2                          | 5                | 4                | A              | 704.5                          | 4                | 4                | A              | 707.5                          | 5.5              | 5                |
| 26   | A              | 747.1                          | 7.8              | 6                | A              | 751.6                          | 6.2              | 6                | A              | 746.5                          | 12.1             | 12               |
| 27   | A              | 778.1                          | 21.5             | 18               | A              | 780.8                          | 9.4              | 9                | A              | 764.4                          | 5.9              | 6                |
| 28   | A              | 785.9                          | 43               | 36               | A              | 789.9                          | 55.3             | 50               | A              | 783.5                          | 30.8             | 30               |
| 29   | A              | 791                            | 17.6             | 15               | A              | 792.2                          | 17.1             | 16               | A              | 789.2                          | 15               | 15               |
| 30   | A              | 862.3                          | 7.1              | 6                | A              | 861.5                          | 8.4              | 8                | A              | 848.1                          | 10.6             | 10               |
| 31   | A              | 878                            | 15.3             | 13               | A              | 884.8                          | 12.6             | 11               | A              | 879.8                          | 20.1             | 19               |
| 32   | A              | 905.8                          | 4.7              | 4                | A              | 910.7                          | 8.6              | 8                | A              | 907.7                          | 5                | 5                |
| 33   | A              | 962                            | 6.2              | 5                | A              | 974                            | 11.1             | 10               | A              | 960                            | 5.2              | 5                |
| 34   | A              | 983.9                          | 6.5              | 5                | A              | 985.7                          | 6.7              | 6                | A              | 988.1                          | 3.4              | 3                |
| 35   | A              | 1022.8                         | 0                | 0                | A              | 1023.8                         | 0.1              | 0                | A              | 1018.2                         | 0.1              | 0                |
| 36   | A              | 1034.1                         | 1.3              | 1                | A              | 1030.3                         | 5.1              | 5                | A              | 1035.1                         | 3.7              | 4                |
| 37   | A              | 1046.5                         | 3.8              | 3                | A              | 1043                           | 5.3              | 5                | A              | 1050                           | 3.8              | 4                |
| 38   | A              | 1065.5                         | 2.2              | 2                | A              | 1065.1                         | 9.1              | 8                | A              | 1063                           | 0.4              | 0                |

|    |   |        |       |     |   |        |       |     |   |        |      |     |
|----|---|--------|-------|-----|---|--------|-------|-----|---|--------|------|-----|
| 39 | A | 1068.6 | 2.6   | 2   | A | 1069.7 | 8.9   | 8   | A | 1067.8 | 8.4  | 8   |
| 40 | A | 1071.3 | 8     | 7   | A | 1075.8 | 3     | 3   | A | 1070.5 | 2.4  | 2   |
| 41 | A | 1091.5 | 12.9  | 11  | A | 1092.3 | 9.9   | 9   | A | 1088.4 | 11.9 | 12  |
| 42 | A | 1126.8 | 3.9   | 3   | A | 1124.5 | 3     | 3   | A | 1123.5 | 2.9  | 3   |
| 43 | A | 1180.6 | 25.7  | 21  | A | 1179.6 | 21.6  | 20  | A | 1173.2 | 9.7  | 9   |
| 44 | A | 1204.8 | 21.5  | 18  | A | 1202.6 | 15.7  | 14  | A | 1193.3 | 21.1 | 20  |
| 45 | A | 1238.6 | 50.8  | 42  | A | 1238.3 | 63.6  | 58  | A | 1231.5 | 48.4 | 47  |
| 46 | A | 1254.3 | 65.7  | 55  | A | 1246.9 | 58.8  | 53  | A | 1252.2 | 9    | 9   |
| 47 | A | 1304.1 | 119.5 | 100 | A | 1301.8 | 109.8 | 100 | A | 1289   | 35.7 | 35  |
| 48 | A | 1332.6 | 34.9  | 29  | A | 1328.1 | 17    | 15  | A | 1333.7 | 48.9 | 48  |
| 49 | A | 1344.4 | 24.8  | 21  | A | 1343.2 | 28.3  | 26  | A | 1338.8 | 16   | 15  |
| 50 | A | 1378.4 | 37.2  | 31  | A | 1375   | 33.3  | 30  | A | 1365.2 | 16.9 | 16  |
| 51 | A | 1402   | 2.2   | 2   | A | 1409.3 | 0.6   | 1   | A | 1400.1 | 2.2  | 2   |
| 52 | A | 1416.7 | 5.1   | 4   | A | 1420.2 | 6.8   | 6   | A | 1419.4 | 19.6 | 19  |
| 53 | A | 1453   | 71.2  | 59  | A | 1468.7 | 69.9  | 64  | A | 1453.9 | 69.3 | 67  |
| 54 | A | 1471.5 | 12    | 10  | A | 1485.1 | 9.6   | 9   | A | 1475.9 | 21.9 | 21  |
| 55 | A | 1476.6 | 5.6   | 5   | A | 1487.8 | 3.5   | 3   | A | 1479.2 | 0.4  | 0   |
| 56 | A | 1486.9 | 6     | 5   | A | 1493.7 | 15.8  | 14  | A | 1491   | 9.1  | 9   |
| 57 | A | 1496.5 | 7.3   | 6   | A | 1508.3 | 36.8  | 33  | A | 1496.8 | 3.2  | 3   |
| 58 | A | 1520.9 | 0.1   | 0   | A | 1519.5 | 0.4   | 0   | A | 1512.1 | 6.2  | 6   |
| 59 | A | 1536.2 | 111.7 | 93  | A | 1535.8 | 107.8 | 98  | A | 1529.6 | 80   | 78  |
| 60 | A | 1587.3 | 16    | 13  | A | 1585.8 | 7.5   | 7   | A | 1581.1 | 15.9 | 15  |
| 61 | A | 1657.5 | 26.5  | 22  | A | 1646.1 | 73.9  | 67  | A | 1649.9 | 54.1 | 53  |
| 62 | A | 1667.2 | 91.1  | 76  | A | 1667.7 | 58.6  | 53  | A | 1661.8 | 25   | 24  |
| 63 | A | 1684.8 | 119.4 | 99  | A | 1678   | 24.1  | 22  | A | 1674.3 | 103  | 100 |
| 64 | A | 1692   | 5.7   | 5   | A | 1692.6 | 3.7   | 3   | A | 1685.9 | 21.9 | 21  |
| 65 | A | 3059   | 4.1   | 3   | A | 3050.9 | 2.4   | 2   | A | 3060.3 | 4.7  | 5   |
| 66 | A | 3062.6 | 6.5   | 5   | A | 3076.4 | 5.9   | 5   | A | 3077.7 | 4.3  | 4   |
| 67 | A | 3126.9 | 2.4   | 2   | A | 3119.6 | 1.1   | 1   | A | 3128.7 | 1.8  | 2   |
| 68 | A | 3130.1 | 2.2   | 2   | A | 3140.2 | 3.6   | 3   | A | 3152.6 | 1.8  | 2   |
| 69 | A | 3151.2 | 2.9   | 2   | A | 3152.8 | 2.9   | 3   | A | 3157.8 | 0.4  | 0   |



|    |   |        |      |    |   |        |      |    |   |        |      |    |
|----|---|--------|------|----|---|--------|------|----|---|--------|------|----|
| 70 | A | 3158.8 | 0.5  | 0  | A | 3177.4 | 4    | 4  | A | 3161.6 | 2.8  | 3  |
| 71 | A | 3197.5 | 0.2  | 0  | A | 3198.7 | 0.1  | 0  | A | 3191.4 | 0.6  | 1  |
| 72 | A | 3204.1 | 1.3  | 1  | A | 3205.1 | 1.3  | 1  | A | 3204.6 | 1    | 1  |
| 73 | A | 3212.9 | 1.9  | 2  | A | 3215.6 | 1.8  | 2  | A | 3208.3 | 2.9  | 3  |
| 74 | A | 3224.1 | 4.1  | 3  | A | 3226.7 | 3.9  | 4  | A | 3223.9 | 4.9  | 5  |
| 75 | A | 3782.8 | 96.7 | 81 | A | 3787.9 | 95.1 | 86 | A | 3868.6 | 64.7 | 63 |

**Table S6. Computational O-H stretching data**

| S. No | HPAI                | OH frequency (cm <sup>-1</sup> ) |                   |
|-------|---------------------|----------------------------------|-------------------|
|       |                     | M06-2X/cc-pVTZ                   | ωB97X-D/ def2tzvp |
| 1     | <b>1E-C1-s</b>      | 3434.5                           | 3445.2            |
| 2     | <b>1E-C2-s</b>      | 3401.7                           | 3420.6            |
| 3     | <b>1E-C3-s</b>      | 3759.6                           | 3742.9            |
| 4     | <b>1E-C4-s</b>      | 3774.5                           | 3753.2            |
| 5     | <b>1E-C3-a</b>      | 3886.4                           | 3787.1            |
| 6     | <b>1E-C4-a</b>      | 3886.4                           | 3886.8            |
| 7     | <b>1E-C1-a</b>      | 3871.8                           | 3871.3            |
| 8     | <b>1E-C1-s-keto</b> | .....                            | .....             |
| 9     | <b>1E-C2-s-keto</b> | .....                            | .....             |
| 10    | <b>1E-C2-a</b>      | 3860.8                           | 3767.7            |
| 11    | <b>1E-C3-s-keto</b> | .....                            | .....             |
| 12    | <b>1E-C4-s-keto</b> | .....                            | .....             |
| 13    | <b>1Z-C3-s</b>      | 3782.8                           | 3749.0            |
| 14    | <b>1Z-C4-s</b>      | 3787.9                           | 3762.4            |
| 15    | <b>1Z-C1-s</b>      | 3868.6                           | 3880.0            |
| 16    | <b>1Z-C2-s</b>      | 3859.4                           | 3877.9            |
| 17    | <b>1Z-C2-a</b>      | 3881.7                           | 3891.0            |
| 18    | <b>1Z-C1-a</b>      | 3882.2                           | 3894.8            |
| 19    | <b>1Z-C3-a</b>      | 3886.1                           | 3890.2            |
| 19    | <b>1Z-C4-a</b>      | 3885.8                           | 3889.5            |
| 21    | <b>1Z-C2-s-keto</b> | .....                            | .....             |
| 22    | <b>1Z-C1-s-keto</b> | .....                            | .....             |

**Table S7. NBO Analysis of 1E-C1-s**

| Donor             | Acceptor               | $\langle E^2 \rangle$ (kcal/mol) |
|-------------------|------------------------|----------------------------------|
| $n_{(N12)}$       | $\sigma^*_{(O26-H27)}$ | 23.24                            |
| $\pi_{(N11-N12)}$ | $\pi^*_{(C2-C3)}$      | 10.03                            |
| $\pi_{(N11-N12)}$ | $\pi^*_{(C13-C15)}$    | 12.05                            |
| $\pi_{(C2-C3)}$   | $\pi^*_{(N11-N12)}$    | 32.14                            |

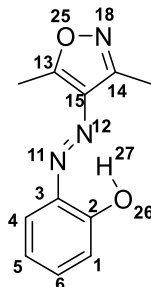
**Table S8.** Computed harmonic frequency and intensity of **1Z-C3-s** at M06-2X/cc-pVTZ level of theory (bold: absolute and normal: scaled) along with the experimental frequency and intensity of the photoproduct after irradiation at 365 nm in Ar matrix at 4 K.

| Normal Mode | Symmetry | Computed                                                |           | Experimental (Ar, 4 K)          |           | $\bar{\nu}_{diff.}$ (cm <sup>-1</sup> ) | Tentative Assignments                                                         |
|-------------|----------|---------------------------------------------------------|-----------|---------------------------------|-----------|-----------------------------------------|-------------------------------------------------------------------------------|
|             |          | $\bar{\nu}_{cal}$ (cm <sup>-1</sup> )<br><b>1Z-C3-s</b> | $I_{rel}$ | $\bar{\nu}$ (cm <sup>-1</sup> ) | $I_{rel}$ |                                         |                                                                               |
| 75          | A        | <b>3782.8</b> , 3593.6                                  | 81        | 3484.0                          | 39        | 298.8                                   | $\nu(OH)$                                                                     |
| 63          | A        | <b>1684.8</b> , 1634.3                                  | 99        | 1629.5                          | --        | 55.3                                    | $\nu_{ph}(CC) + \nu_{iso}(CC) + \nu_{iso}(CN) + \nu(NN) + \delta_{iso}(CH_3)$ |
| 62          | A        | <b>1667.2</b> , 1617.1                                  | 76        | 1600.5                          | 36        | 66.7                                    | $\nu_{ph}(CC) + \nu_{iso}(CC) + \nu(NN) + \delta_{ph}(CH) + \delta(OH)$       |
| 61          | A        | <b>1657.5</b> , 1607.8                                  | 22        | 1587.0                          | 25        | 70.5                                    | $\nu(NN) + \nu_{ph}(CC) + \nu_{iso}(CC) + \delta_{ph}(CH) + \delta(OH)$       |
| 59          | A        | <b>1536.2</b> , 1490.1                                  | 93        | 1482.0                          | 58        | 54.2                                    | $\nu_{ph}(CO) + \nu_{ph}(CC) + \delta_{ph}(CH)$                               |
| 57          | A        | <b>1496.5</b> , 1451.6                                  | 6         | 1467.0                          | 16        | 29.5                                    | $\nu_{iso}(CO) + \nu_{iso}(CC) + \delta_{iso}(CH_3)$                          |
| 56          | A        | <b>1486.9</b> , 1442.3                                  | 5         | 1439.0                          | 16        | 47.9                                    | $\delta_{iso}(CH_3)$                                                          |
| 54          | A        | <b>1471.5</b> , 1427.3                                  | 10        | 1431.0                          | 15        | 40.5                                    | $\gamma_{iso}(CH_3)$                                                          |
| 53          | A        | <b>1453.0</b> , 1409.4                                  | 59        | 1414.0                          | 67        | 39.0                                    | $\nu_{iso}(CO) + \nu_{iso}(CC) + \delta_{iso}(CH_3)$                          |
| 52          | A        | <b>1416.7</b> , 1375.2                                  | <5        | 1380.5                          | 16        | 36.2                                    | $\nu_{ph}(CC) + \delta_{ph}(CH) + \delta(OH) + \nu_{iso}(CC) + \nu(NN)$       |

|    |   |                        |     |        |     |       |                                                                                                                                                           |
|----|---|------------------------|-----|--------|-----|-------|-----------------------------------------------------------------------------------------------------------------------------------------------------------|
| 50 | A | <b>1378.4</b> , 1337.1 | 31  | 1348.0 | 34  | 30.4  | $\nu_{\text{ph}}(\text{CC})+\delta_{\text{ph}}(\text{CH})+\delta(\text{OH})$                                                                              |
| 49 | A | <b>1344.4</b> , 1304.1 | 21  | 1317.0 | 50  | 26.9  | $\delta_{\text{ph}}(\text{CH})+\delta_{\text{ph}}(\text{OH})+\nu_{\text{iso}}(\text{ring})$                                                               |
| 48 | A | <b>1332.6</b> , 1292.6 | 29  | 1316.0 | 58  | 16.6  | $\nu_{\text{iso}}(\text{CO})+\nu_{\text{iso}}(\text{CC})+\delta_{\text{iso}}(\text{CH}_3)$                                                                |
| 47 | A | <b>1304.1</b> , 1265.0 | 100 | 1250.0 | 100 | 54.1  | $\nu_{\text{ph}}(\text{CO})+\nu_{\text{ph}}(\text{CC})+\delta_{\text{ph}}(\text{CH})+\delta(\text{OH})$                                                   |
| 46 | A | <b>1254.3</b> , 1216.6 | 55  | 1217.0 | 45  | 37.3  | $\nu_{\text{iso}}(\text{CN}_{\text{azo}})+\delta_{\text{ph}}(\text{CH})+\delta(\text{OH})$                                                                |
| 45 | A | <b>1238.6</b> , 1201.5 | 42  | 1182.0 | 53  | 56.6  | $\nu_{\text{iso}}(\text{CN}_{\text{azo}})+\nu_{\text{ph}}(\text{CN}_{\text{azo}})+\delta_{\text{ph}}(\text{CH})+\delta(\text{OH})$                        |
| 44 | A | <b>1204.8</b> , 1168.6 | 18  | 1176.5 | 20  | 28.3  | $\delta_{\text{ph}}(\text{CH})+\delta_{\text{ph}}(\text{OH})$                                                                                             |
| 43 | A | <b>1180.6</b> , 1145.2 | 21  | 1145.0 | 22  | 35.6  | $\delta_{\text{ph}}(\text{CH})$                                                                                                                           |
| 41 | A | <b>1091.5</b> , 1058.7 | 11  | 1028.0 | 10  | 63.5  | $\delta_{\text{iso}}(\text{CH}_3)+\tau_{\text{iso}}(\text{ring})$                                                                                         |
| 40 | A | <b>1071.3</b> , 1039.1 | 7   | 1024.0 | 26  | 47.3  | $\delta_{\text{ph}}(\text{CH})+\delta_{\text{ph}}(\text{OH})$                                                                                             |
| 34 | A | <b>983.9</b> , 954.4   | 5   | 970.0  | 40  | 13.9  | $\gamma_{\text{ph}}(\text{CH})$                                                                                                                           |
| 33 | A | <b>962.0</b> , 933.1   | 5   | 966.0  | 41  | -4.0  | $\nu_{\text{iso}}(\text{NO})+\gamma_{\text{iso}}(\text{CH}_3)$                                                                                            |
| 32 | A | <b>905.8</b> , 878.6   | 4   | 905.0  | 16  | 0.8   | $\gamma_{\text{ph}}(\text{CH})+\gamma_{\text{ph}}(\text{CN}_{\text{azo}})$                                                                                |
| 31 | A | <b>878.0</b> , 851.7   | 13  | 846.0  | 32  | 32.0  | $\gamma_{\text{ph}}(\text{CH})+\gamma_{\text{ph}}(\text{CN}_{\text{azo}})$                                                                                |
| 30 | A | <b>862.3</b> , 836.4   | 6   | 841.0  | 33  | 21.3  | $\delta_{\text{ph}}(\text{ring})+\nu_{\text{ph}}(\text{CO})$                                                                                              |
| 28 | A | <b>785.9</b> , 762.4   | 36  | o      | -   | -     | $\gamma_{\text{ph}}(\text{CH})+\gamma_{\text{ph}}(\text{CN}_{\text{azo}})$                                                                                |
| 27 | A | <b>778.1</b> , 754.8   | 18  | 743.0  | 20  | 35.1  | $\gamma_{\text{ph}}(\text{CH})+\gamma_{\text{ph}}(\text{ring})+\nu_{\text{iso}}(\text{ring})$                                                             |
| 20 | A | <b>571.5</b> , 554.4   | 35  | 577.0  | 34  | -5.5  | $\gamma(\text{OH})+\delta_{\text{ph}}(\text{ring})$                                                                                                       |
| 19 | A | <b>564.2</b> , 547.3   | 28  | 565.0  | 31  | -0.8  | $\gamma(\text{OH})$                                                                                                                                       |
| 18 | A | <b>538.5</b> , 522.4   | 31  | 553.0  | 28  | -14.5 | $\gamma(\text{OH})+\gamma_{\text{ph}}(\text{CH})$                                                                                                         |
| 17 | A | <b>525.1</b> , 509.4   | 8   | 510.0  | 31  | 15.1  | $\gamma(\text{OH})+\delta_{\text{ph}}(\text{ring})$                                                                                                       |
| 16 | A | <b>495.0</b> , 480.1   | 4   | 485.0  | 41  | 10.0  | $\tau_{\text{iso}}(\text{ring})+\gamma_{\text{ph}}(\text{CH})+\gamma(\text{OH})+\nu_{\text{iso}}(\text{CH}_3)+\gamma_{\text{ph}}(\text{CN}_{\text{azo}})$ |

o - overlapping;  $\nu$  - stretching;  $\delta$  - in-plane-bending;  $\gamma$  - out-of-plane bending;  $\tau$  - torsion.

**Table S9.** Computed frequency and intensity of **1Z-C3-s** at  $\omega\text{B97X-D/def2tzvp}$  level of theory (unscaled) along with the experimental frequency and intensity of the photoproduct after irradiation at 365 nm in Ar matrix at 4 K.

| Normal Mode | Symmetry | Computed                                                       |                  | Experimental (Ar, 4 K)          |                  | $\bar{\nu}_{\text{diff.}}$ (cm <sup>-1</sup> ) | Tentative Assignments                                                                                                                |
|-------------|----------|----------------------------------------------------------------|------------------|---------------------------------|------------------|------------------------------------------------|--------------------------------------------------------------------------------------------------------------------------------------|
|             |          | $\bar{\nu}_{\text{cal}}$ (cm <sup>-1</sup> )<br><b>1Z-C3-s</b> | $I_{\text{rel}}$ | $\bar{\nu}$ (cm <sup>-1</sup> ) | $I_{\text{rel}}$ |                                                |                                                                                                                                      |
| 75          | A        | 3749.0                                                         | 70               | 3484.0                          | 39               | 265                                            | $\nu(\text{OH})$                                                                                                                     |
| 63          | A        | 1674.4                                                         | 97               | 1611.0                          | 13               | 63.4                                           | $\nu_{\text{ph}}(\text{CC})+\nu_{\text{iso}}(\text{CC})+\nu_{\text{iso}}(\text{CN})+\nu(\text{NN})+\delta_{\text{iso}}(\text{CH}_3)$ |
| 62          | A        | 1659.9                                                         | 74               | 1600.5                          | 36               | 59.4                                           | $\nu_{\text{ph}}(\text{CC})+\nu_{\text{iso}}(\text{CC})+\nu(\text{NN})+\delta_{\text{ph}}(\text{CH})+\delta(\text{OH})$              |
| 61          | A        | 1645.1                                                         | 22               | 1587.0                          | 25               | 58.1                                           | $\nu_{\text{ph}}(\text{CC})+\nu_{\text{iso}}(\text{CC})+\nu(\text{NN})+\delta_{\text{ph}}(\text{CH})+\delta(\text{OH})$              |
| 59          | A        | 1538.0                                                         | 100              | 1482.0                          | 58               | 56.0                                           | $\nu_{\text{ph}}(\text{CO})+\nu_{\text{ph}}(\text{CC})+\delta_{\text{ph}}(\text{CH})$                                                |

|    |   |        |    |        |     |      |                                                                                                                                                                       |
|----|---|--------|----|--------|-----|------|-----------------------------------------------------------------------------------------------------------------------------------------------------------------------|
| 57 | A | 1501.7 | 10 | 1467.0 | 16  | 34.7 | $\nu_{\text{iso}}(\text{CO}) + \nu_{\text{iso}}(\text{CC}) + \delta_{\text{iso}}(\text{CH}_3)$                                                                        |
| 56 | A | 1494.0 | 6  | 1439.0 | 16  | 55.0 | $\delta_{\text{iso}}(\text{CH}_3)$                                                                                                                                    |
| 54 | A | 1483.5 | 14 | 1431.0 | 15  | 52.5 | $\delta_{\text{iso}}(\text{CH}_3)$                                                                                                                                    |
| 53 | A | 1460.3 | 54 | 1414.0 | 67  | 46.3 | $\nu_{\text{iso}}(\text{CO}) + \nu_{\text{iso}}(\text{CC}) + \delta_{\text{iso}}(\text{CH}_3)$                                                                        |
| 52 | A | 1428.2 | 9  | 1380.5 | 16  | 47.7 | $\nu_{\text{ph}}(\text{CC}) + \delta_{\text{ph}}(\text{CH}) + \delta(\text{OH}) + \nu_{\text{iso}}(\text{CC}) + \nu(\text{NN})$                                       |
| 50 | A | 1382.5 | 28 | 1348.0 | 34  | 34.5 | $\nu_{\text{ph}}(\text{CC}) + \delta_{\text{ph}}(\text{CH}) + \delta(\text{OH})$                                                                                      |
| 49 | A | 1354.1 | 46 | 1317.0 | 50  | 37.1 | $\delta_{\text{ph}}(\text{CH}) + \delta_{\text{ph}}(\text{OH}) + \nu_{\text{iso}}(\text{ring})$                                                                       |
| 48 | A | 1333.4 | 30 | 1316.0 | 58  | 17.4 | $\nu_{\text{iso}}(\text{CO}) + \nu_{\text{iso}}(\text{CC}) + \delta_{\text{iso}}(\text{CH}_3)$                                                                        |
| 47 | A | 1307.1 | 88 | 1250.0 | 100 | 57.1 | $\nu_{\text{ph}}(\text{CO}) + \nu_{\text{ph}}(\text{CC}) + \delta_{\text{ph}}(\text{CH}) + \delta(\text{OH})$                                                         |
| 45 | A | 1238.5 | 54 | 1182.0 | 53  | 56.5 | $\nu_{\text{iso}}(\text{CN}_{\text{azo}}) + \nu_{\text{ph}}(\text{CN}_{\text{azo}}) + \nu_{\text{ph}}(\text{CC}) + \delta_{\text{ph}}(\text{CH}) + \delta(\text{OH})$ |
| 44 | A | 1211.5 | 39 | 1176.5 | 20  | 35.0 | $\delta_{\text{ph}}(\text{CH}) + \delta_{\text{ph}}(\text{OH})$                                                                                                       |
| 43 | A | 1180.3 | 23 | 1145.0 | 22  | 35.3 | $\delta_{\text{ph}}(\text{CH})$                                                                                                                                       |
| 41 | A | 1097.0 | 23 | 1028.0 | 10  | 69   | $\delta_{\text{iso}}(\text{CH}_3) + \tau_{\text{iso}}(\text{ring})$                                                                                                   |
| 40 | A | 1070.4 | 8  | 1024.0 | 26  | 46.4 | $\nu_{\text{ph}}(\text{CC}) + \delta_{\text{ph}}(\text{CH})$                                                                                                          |
| 34 | A | 986.6  | 5  | 970.0  | 40  | 16.6 | $\gamma_{\text{ph}}(\text{CH})$                                                                                                                                       |
| 33 | A | 961.9  | 4  | 966.0  | 41  | -4.1 | $\nu_{\text{iso}}(\text{NO}) + \nu_{\text{iso}}(\text{CH}_3)$                                                                                                         |
| 32 | A | 907.8  | 3  | 905.0  | 16  | 2.8  | $\gamma_{\text{ph}}(\text{CH}) + \gamma_{\text{ph}}(\text{CN}_{\text{azo}})$                                                                                          |
| 31 | A | 879.4  | 14 | 846.0  | 32  | 33.4 | $\gamma_{\text{ph}}(\text{CH}) + \gamma_{\text{ph}}(\text{CN}_{\text{azo}})$                                                                                          |
| 30 | A | 868.7  | 4  | 841.0  | 33  | 27.7 | $\delta_{\text{ph}}(\text{ring}) + \nu_{\text{ph}}(\text{CO})$                                                                                                        |
| 28 | A | 787.3  | 31 | 743.0  | 20  | 44.3 | $\gamma_{\text{ph}}(\text{CH}) + \gamma_{\text{ph}}(\text{CN}_{\text{azo}})$                                                                                          |
| 21 | A | 589.4  | 67 | 577.0  | 34  | 12.4 | $\gamma(\text{OH})$                                                                                                                                                   |
| 19 | A | 571.4  | 6  | 565.0  | 31  | 6.4  | $\gamma(\text{OH}) + \delta_{\text{ph}}(\text{ring})$                                                                                                                 |
| 18 | A | 544.6  | 23 | 553.0  | 28  | -8.4 | $\gamma(\text{OH}) + \gamma_{\text{ph}}(\text{CH})$                                                                                                                   |
| 17 | A | 526.5  | 5  | 510.0  | 31  | 16.5 | $\gamma(\text{OH}) + \delta_{\text{ph}}(\text{ring})$                                                                                                                 |
| 16 | A | 498.4  | 4  | 485.0  | 41  | 13.4 | $\tau_{\text{iso}}(\text{ring}) + \gamma_{\text{ph}}(\text{CH}) + \gamma(\text{OH}) + \nu_{\text{iso}}(\text{CH}_3) + \gamma_{\text{ph}}(\text{CN}_{\text{azo}})$     |

$\nu$  - stretching;  $\delta$  - in-plane-bending;  $\gamma$  - out-of-plane bending;  $\tau$  - torsion.

**Table S10.** Computed frequency and intensity of **1Z-C4-s** at M06-2X/cc-pVTZ level of theory (bold: absolute and normal: scaled) along with the experimental frequency and intensity of the photoproduct after irradiation at 365 nm in Ar matrix at 4 K.

| Normal Mode | Symmetry | Computed                                     |                  | Experimental (Ar, 4 K)          |                  | $\bar{\nu}_{\text{diff.}}$ (cm <sup>-1</sup> ) | Tentative Assignments |
|-------------|----------|----------------------------------------------|------------------|---------------------------------|------------------|------------------------------------------------|-----------------------|
|             |          | $\bar{\nu}_{\text{cal}}$ (cm <sup>-1</sup> ) | $I_{\text{rel}}$ | $\bar{\nu}$ (cm <sup>-1</sup> ) | $I_{\text{rel}}$ |                                                |                       |
| 75          | A        | <b>3787.9</b> , 3598.5                       | 86               | 3484.0                          | 39               | 303.9                                          | $\nu(\text{OH})$      |

|    |   |                        |     |        |     |      |                                                                                                                                                                                                   |
|----|---|------------------------|-----|--------|-----|------|---------------------------------------------------------------------------------------------------------------------------------------------------------------------------------------------------|
| 63 | A | <b>1678.0</b> , 1627.6 | 22  | 1611.0 | 13  | 67.0 | $\nu_{\text{iso}}(\text{CN}) + \nu_{\text{ph}}(\text{CC}) + \nu_{\text{iso}}(\text{CC}) + \nu(\text{NN}) + \delta_{\text{iso}}(\text{CH}_3) + \delta(\text{OH})$                                  |
| 62 | A | <b>1667.7</b> , 1617.7 | 53  | 1600.5 | 36  | 67.2 | $\nu_{\text{ph}}(\text{CC}) + \delta_{\text{ph}}(\text{CH}) + \delta(\text{OH})$                                                                                                                  |
| 61 | A | <b>1646.1</b> , 1596.8 | 67  | 1587.0 | 25  | 59.1 | $\nu_{\text{iso}}(\text{CN}) + \nu_{\text{ph}}(\text{CC}) + \nu_{\text{iso}}(\text{CC}) + \nu(\text{NN}) + \delta(\text{OH})$                                                                     |
| 59 | A | <b>1535.8</b> , 1489.7 | 98  | 1482.0 | 58  | 53.8 | $\nu_{\text{ph}}(\text{CC}) + \delta_{\text{ph}}(\text{CH})$                                                                                                                                      |
| 57 | A | <b>1508.3</b> , 1463.0 | 33  | 1467.0 | 16  | 41.3 | $\nu_{\text{iso}}(\text{CC}) + \nu_{\text{iso}}(\text{CO}) + \delta_{\text{iso}}(\text{CH}_3)$                                                                                                    |
| 56 | A | <b>1493.7</b> , 1448.9 | 14  | 1439.0 | 16  | 54.7 | $\delta_{\text{iso}}(\text{CH}_3)$                                                                                                                                                                |
| 54 | A | <b>1485.1</b> , 1440.5 | 9   | 1431.0 | 15  | 54.1 | $\delta_{\text{iso}}(\text{CH}_3)$                                                                                                                                                                |
| 53 | A | <b>1468.7</b> , 1424.7 | 64  | 1414.0 | 67  | 54.7 | $\nu_{\text{iso}}(\text{CC}) + \delta_{\text{iso}}(\text{CH}_3)$                                                                                                                                  |
| 50 | A | <b>1375.0</b> , 1333.8 | 30  | 1348.0 | 34  | 27.0 | $\nu_{\text{ph}}(\text{CC}) + \delta_{\text{ph}}(\text{CH}) + \delta(\text{OH})$                                                                                                                  |
| 48 | A | <b>1328.1</b> , 1288.2 | 15  | 1316.0 | 58  | 12.1 | $\nu_{\text{iso}}(\text{CC}) + \nu_{\text{iso}}(\text{CO}) + \delta_{\text{iso}}(\text{CH}_3)$                                                                                                    |
| 47 | A | <b>1301.8</b> , 1262.7 | 100 | 1250.0 | 100 | 51.8 | $\nu_{\text{ph}}(\text{CC}) + \nu_{\text{ph}}(\text{CO}) + \delta_{\text{ph}}(\text{CH}) + \delta(\text{OH})$                                                                                     |
| 45 | A | <b>1238.3</b> , 1201.1 | 58  | 1182.0 | 53  | 56.3 | $\nu_{\text{ph}}(\text{CN}_{\text{azo}}) + \delta_{\text{ph}}(\text{CH}) + \delta(\text{OH})$                                                                                                     |
| 39 | A | <b>1069.7</b> , 1037.6 | 8   | 1024.0 | 26  | 45.7 | $\nu_{\text{ph}}(\text{CC}) + \delta_{\text{ph}}(\text{CH})$                                                                                                                                      |
| 34 | A | <b>985.7</b> , 956.2   | 6   | 970.0  | 40  | 15.7 | $\gamma_{\text{ph}}(\text{CH})$                                                                                                                                                                   |
| 33 | A | <b>974.0</b> , 944.8   | 10  | 966.0  | 41  | 8.0  | $\gamma_{\text{iso}}(\text{CH}_3) + \nu_{\text{iso}}(\text{NO})$                                                                                                                                  |
| 32 | A | <b>910.7</b> , 883.4   | 8   | 905.0  | 16  | 5.7  | $\gamma_{\text{ph}}(\text{CH}) + \gamma_{\text{ph}}(\text{CN}_{\text{azo}})$                                                                                                                      |
| 31 | A | <b>884.8</b> , 858.3   | 11  | 846.0  | 32  | 38.8 | $\gamma_{\text{ph}}(\text{CH}) + \gamma_{\text{ph}}(\text{CN}_{\text{azo}})$                                                                                                                      |
| 30 | A | <b>861.5</b> , 835.7   | 8   | 841.0  | 33  | 20.5 | $\delta_{\text{ph}}(\text{ring}) + \nu_{\text{ph}}(\text{CO})$                                                                                                                                    |
| 28 | A | <b>789.9</b> , 766.2   | 50  | 743.0  | 20  | 46.9 | $\gamma_{\text{ph}}(\text{CH}) + \gamma_{\text{ph}}(\text{CN}_{\text{azo}})$                                                                                                                      |
| 20 | A | <b>568.5</b> , 551.4   | 32  | 577.0  | 34  | -8.5 | $\gamma(\text{OH}) + \delta_{\text{ph}}(\text{ring}) + \tau(\text{CNNC})$                                                                                                                         |
| 19 | A | <b>559.9</b> , 543.1   | 39  | 565.0  | 31  | -5.1 | $\gamma(\text{OH})$                                                                                                                                                                               |
| 17 | A | <b>525.5</b> , 520.5   | 24  | 510.0  | 31  | 15.5 | $\gamma(\text{OH}) + \delta_{\text{ph}}(\text{ring})$                                                                                                                                             |
| 16 | A | <b>491.9</b> , 477.1   | 3   | 485.0  | 41  | 6.9  | $\gamma_{\text{ph}}(\text{CH}) + \gamma_{\text{ph}}(\text{CN}_{\text{azo}}) + \nu_{\text{iso}}(\text{CH}_3) + \tau(\text{CNNC}) + \tau_{\text{ph}}(\text{ring}) + \tau_{\text{iso}}(\text{ring})$ |

v - stretching;  $\delta$  - in-plane-bending;  $\gamma$  - out-of-plane bending;  $\tau$  - torsion; Scaling factor used: 0.97 below 2000  $\text{cm}^{-1}$  and 0.95 above 2000  $\text{cm}^{-1}$ .

**Table S11.** Computed frequency and intensity of **1Z-C4-s** at  $\omega\text{B97X-D/def2tzvp}$  level of theory (unscaled) along with the experimental frequency and intensity of the photoproduct after irradiation at 365 nm in Ar matrix at 4 K.

| Normal Mode | Symmetry | Computed                                                        |                  | Experimental (Ar, 4 K)           |                  | $\bar{\nu}_{\text{diff.}}$ ( $\text{cm}^{-1}$ ) | Tentative Assignments |
|-------------|----------|-----------------------------------------------------------------|------------------|----------------------------------|------------------|-------------------------------------------------|-----------------------|
|             |          | $\bar{\nu}_{\text{cal}}$ ( $\text{cm}^{-1}$ )<br><b>1Z-C4-s</b> | $I_{\text{rel}}$ | $\bar{\nu}$ ( $\text{cm}^{-1}$ ) | $I_{\text{rel}}$ |                                                 |                       |
| 75          | A        | 3762.4                                                          | 61               | 3484.0                           | 39               | 278.4                                           | $\nu(\text{OH})$      |

|    |   |        |     |        |     |      |                                                                                                                                                                                                   |
|----|---|--------|-----|--------|-----|------|---------------------------------------------------------------------------------------------------------------------------------------------------------------------------------------------------|
| 63 | A | 1668.4 | 23  | 1611.0 | 13  | 57.4 | $\nu_{\text{iso}}(\text{CN}) + \nu_{\text{ph}}(\text{CC}) + \nu_{\text{iso}}(\text{CC}) + \nu(\text{NN}) + \delta_{\text{iso}}(\text{CH}_3) + \delta(\text{OH})$                                  |
| 62 | A | 1660.3 | 51  | 1600.5 | 36  | 59.8 | $\nu_{\text{ph}}(\text{CC}) + \delta_{\text{ph}}(\text{CH}) + \delta(\text{OH})$                                                                                                                  |
| 61 | A | 1635.4 | 53  | 1587.0 | 25  | 48.4 | $\nu_{\text{iso}}(\text{CN}) + \nu_{\text{ph}}(\text{CC}) + \nu_{\text{iso}}(\text{CC}) + \nu(\text{NN}) + \delta(\text{OH})$                                                                     |
| 59 | A | 1533.0 | 90  | 1482.0 | 58  | 51.0 | $\nu_{\text{ph}}(\text{CC}) + \delta_{\text{ph}}(\text{CH})$                                                                                                                                      |
| 57 | A | 1512.3 | 27  | 1467.0 | 16  | 45.3 | $\nu_{\text{iso}}(\text{CC}) + \nu_{\text{iso}}(\text{CO}) + \delta_{\text{iso}}(\text{CH}_3)$                                                                                                    |
| 56 | A | 1498.1 | 4   | 1439.0 | 16  | 59.1 | $\delta_{\text{iso}}(\text{CH}_3)$                                                                                                                                                                |
| 54 | A | 1480.6 | 25  | 1431.0 | 15  | 49.6 | $\delta_{\text{iso}}(\text{CH}_3)$                                                                                                                                                                |
| 53 | A | 1469.6 | 47  | 1414.0 | 67  | 55.6 | $\nu_{\text{iso}}(\text{CC}) + \delta_{\text{iso}}(\text{CH}_3)$                                                                                                                                  |
| 50 | A | 1389.7 | 38  | 1348.0 | 34  | 41.7 | $\nu_{\text{ph}}(\text{CC}) + \delta_{\text{ph}}(\text{CH}) + \delta(\text{OH})$                                                                                                                  |
| 48 | A | 1329.3 | 12  | 1316.0 | 58  | 13.3 | $\nu_{\text{iso}}(\text{CC}) + \nu_{\text{iso}}(\text{CO}) + \delta_{\text{iso}}(\text{CH}_3)$                                                                                                    |
| 47 | A | 1301.7 | 100 | 1250.0 | 100 | 51.7 | $\nu_{\text{ph}}(\text{CC}) + \nu_{\text{ph}}(\text{CO}) + \delta_{\text{ph}}(\text{CH}) + \delta(\text{OH})$                                                                                     |
| 45 | A | 1243.9 | 7   | 1182.0 | 53  | 61.9 | $\nu_{\text{iso}}(\text{CN}_{\text{azo}}) + \delta_{\text{ph}}(\text{CH}) + \delta(\text{OH})$                                                                                                    |
| 39 | A | 1064.1 | 7   | 1024.0 | 26  | 40.1 | $\nu_{\text{ph}}(\text{CC}) + \delta_{\text{ph}}(\text{CH})$                                                                                                                                      |
| 34 | A | 976.5  | 5   | 970.0  | 40  | 6.5  | $\gamma_{\text{ph}}(\text{CH})$                                                                                                                                                                   |
| 33 | A | 970.2  | 9   | 966.0  | 41  | 4.2  | $\gamma_{\text{iso}}(\text{CH}_3) + \nu_{\text{iso}}(\text{NO})$                                                                                                                                  |
| 32 | A | 908.9  | 8   | 905.0  | 16  | 3.9  | $\gamma_{\text{ph}}(\text{CH}) + \gamma_{\text{ph}}(\text{CN}_{\text{azo}})$                                                                                                                      |
| 31 | A | 879.7  | 10  | 846.0  | 32  | 33.7 | $\gamma_{\text{ph}}(\text{CH}) + \gamma_{\text{ph}}(\text{CN}_{\text{azo}})$                                                                                                                      |
| 30 | A | 867.3  | 6   | 841.0  | 33  | 26.3 | $\delta_{\text{ph}}(\text{ring}) + \nu_{\text{ph}}(\text{CO})$                                                                                                                                    |
| 28 | A | 786.7  | 29  | 743.0  | 20  | 43.7 | $\gamma_{\text{ph}}(\text{CH}) + \gamma_{\text{ph}}(\text{CN}_{\text{azo}})$                                                                                                                      |
| 21 | A | 589.8  | 41  | 577.0  | 34  | 12.8 | $\gamma(\text{OH}) + \delta_{\text{ph}}(\text{ring})$                                                                                                                                             |
| 19 | A | 568.3  | 8   | 565.0  | 31  | 3.3  | $\gamma(\text{OH}) + \delta_{\text{ph}}(\text{ring}) + \delta_{\text{iso}}(\text{ring}) + \tau(\text{CNNC})$                                                                                      |
| 17 | A | 527.6  | 12  | 510.0  | 31  | 17.6 | $\gamma(\text{OH}) + \delta_{\text{ph}}(\text{ring}) + \gamma_{\text{ph}}(\text{CH})$                                                                                                             |
| 16 | A | 493.1  | 2   | 485.0  | 41  | 8.1  | $\gamma_{\text{ph}}(\text{CH}) + \gamma_{\text{ph}}(\text{CN}_{\text{azo}}) + \nu_{\text{iso}}(\text{CH}_3) + \tau(\text{CNNC}) + \tau_{\text{ph}}(\text{ring}) + \tau_{\text{iso}}(\text{ring})$ |

v - stretching;  $\delta$  - in-plane-bending;  $\gamma$  - out-of-plane bending;  $\tau$  - torsion.

S6: Solution phase photoswitching and kinetics data: UV-Vis spectroscopic studies

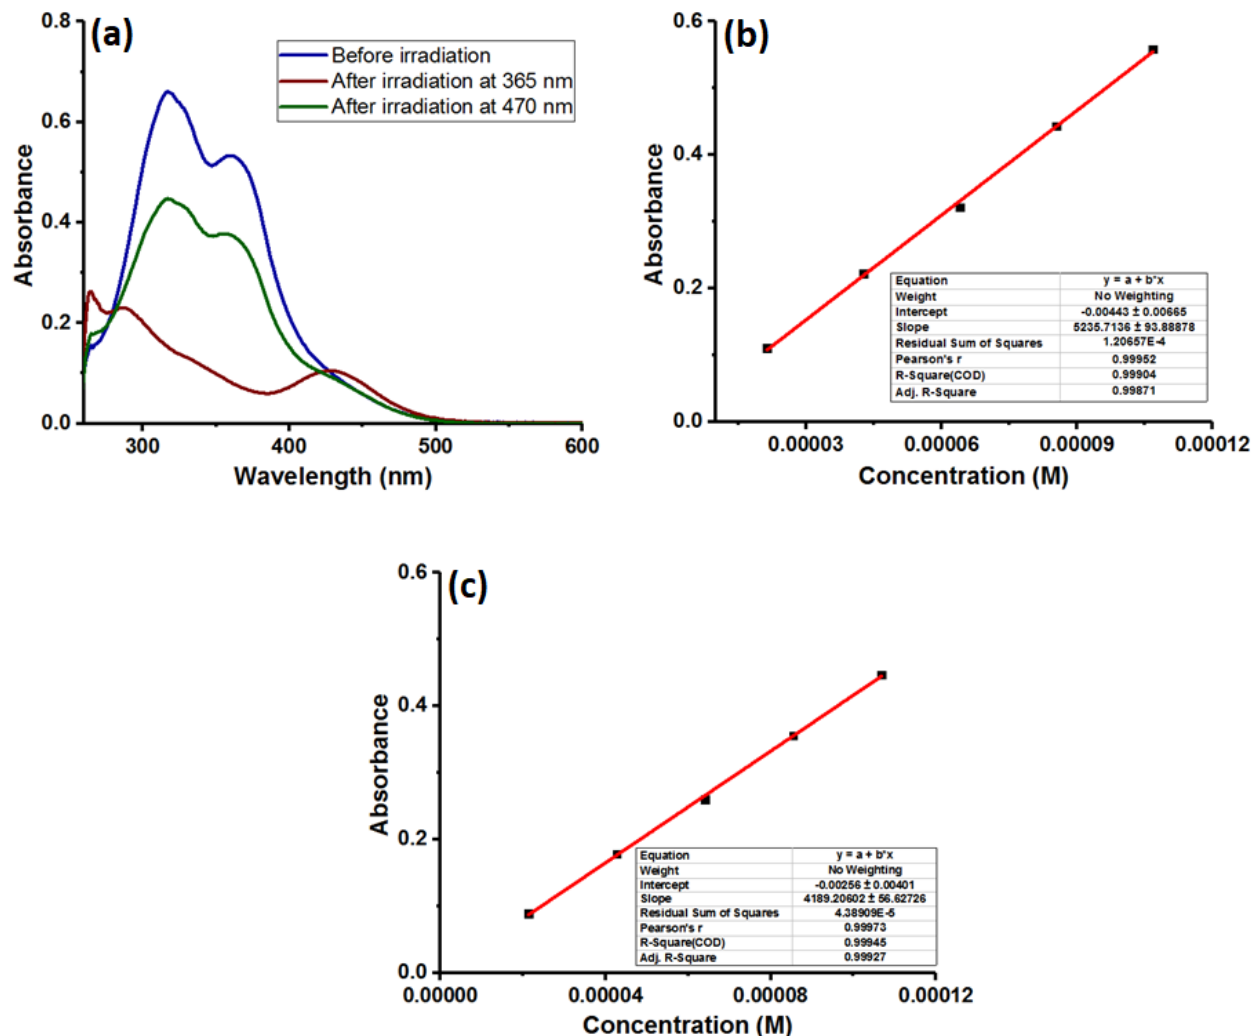

**Figure S25.** (a) UV-Vis spectral data depicting the photoswitching in HPAI (126  $\mu\text{M}$ , DMSO) at different irradiation conditions; Estimation of molar absorption coefficient corresponding to the  $\lambda_{\text{max}}(\pi-\pi^*)$ : (b) 317 nm ( $\epsilon$ ,  $5236 \pm 94 \text{ M}^{-1} \text{ cm}^{-1}$ ), and (c) 360 nm ( $\epsilon$ ,  $4189 \pm 57 \text{ M}^{-1} \text{ cm}^{-1}$ ) in DMSO.

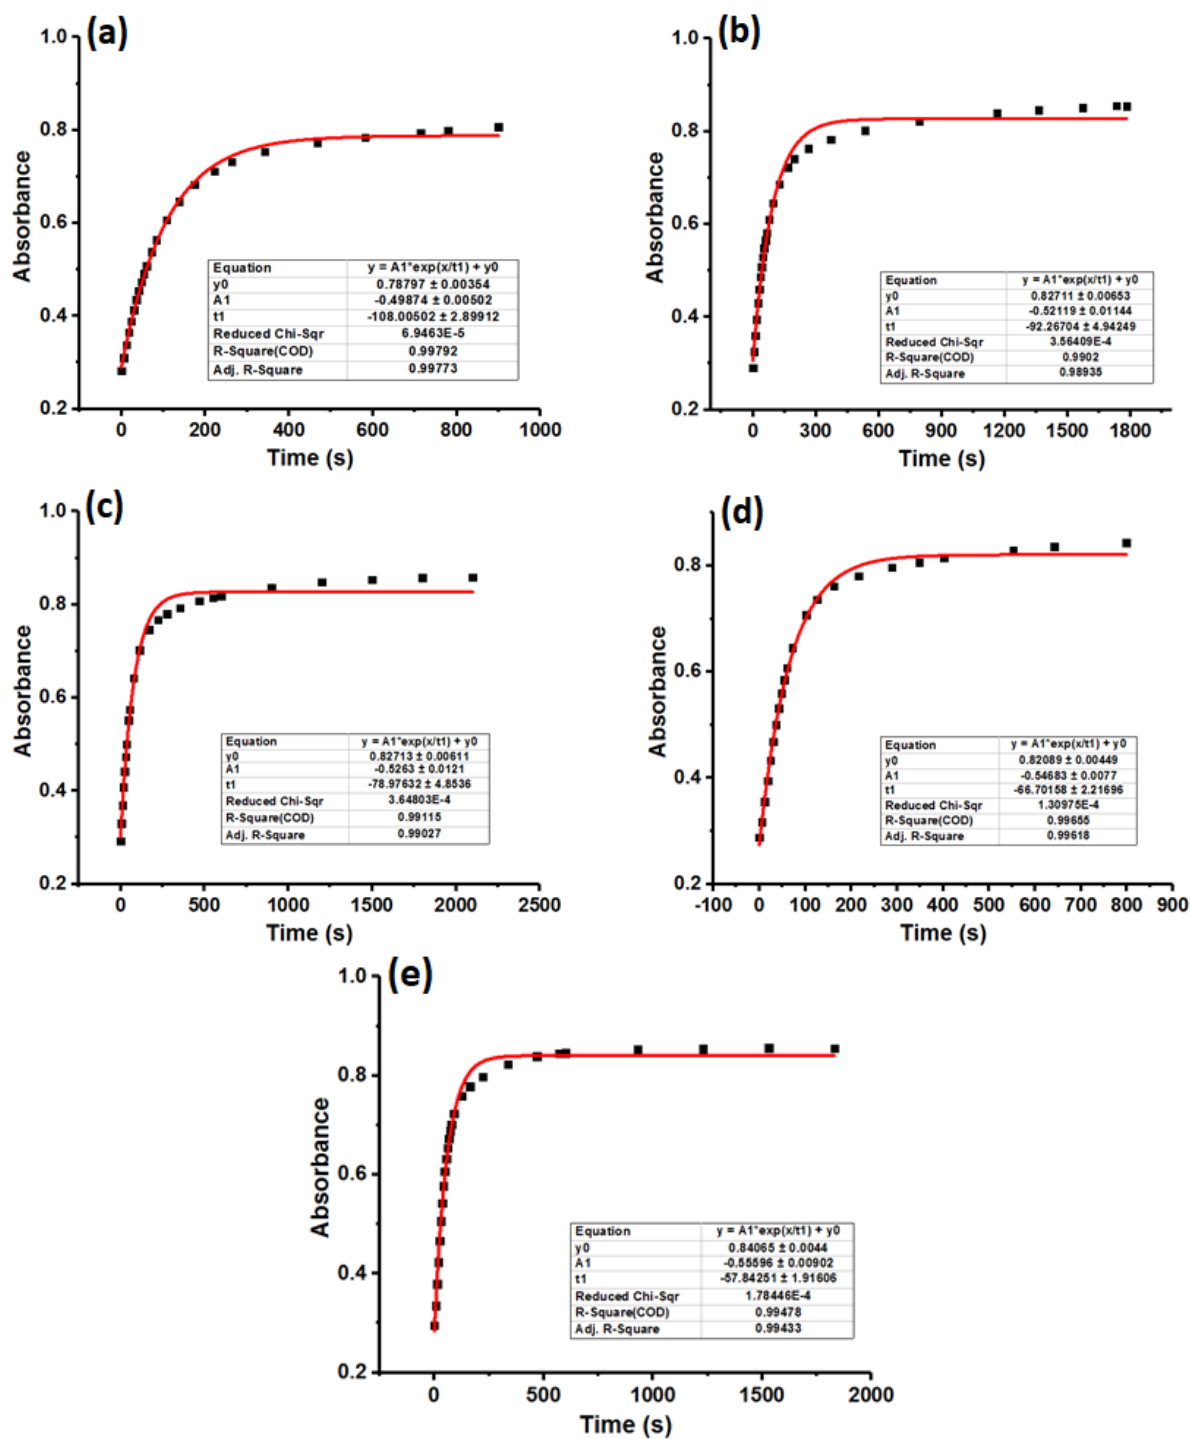

**Figure S26.** Kinetics data for the thermal reverse isomerization of HPAI at (a) 25 °C, (b) 30 °C, (c) 35 °C, (d) 40 °C and (e) 45 °C in DMSO (152 μM). Kinetics data have been followed by the absorption changes at  $\lambda_{\max}(\pi-\pi^*) = 317$  nm of *E*-isomer.



**Table S12.** Half-lives and rate constants for the thermal reverse isomerization of **HPAI** at variable temperature.

| Compound    | Temperature (°C) | Rate constant (s <sup>-1</sup> )            | Half-life (s) | Conc. [μM] |
|-------------|------------------|---------------------------------------------|---------------|------------|
| <b>HPAI</b> | 25               | $9.3 \times 10^{-3} \pm 2.5 \times 10^{-4}$ | 75            | 152        |
|             | 30               | $1.1 \times 10^{-2} \pm 5.8 \times 10^{-4}$ | 64            | 152        |
|             | 35               | $1.3 \times 10^{-2} \pm 7.8 \times 10^{-4}$ | 55            | 152        |
|             | 40               | $1.5 \times 10^{-2} \pm 5.0 \times 10^{-4}$ | 46            | 152        |
|             | 45               | $1.7 \times 10^{-2} \pm 5.7 \times 10^{-4}$ | 40            | 152        |

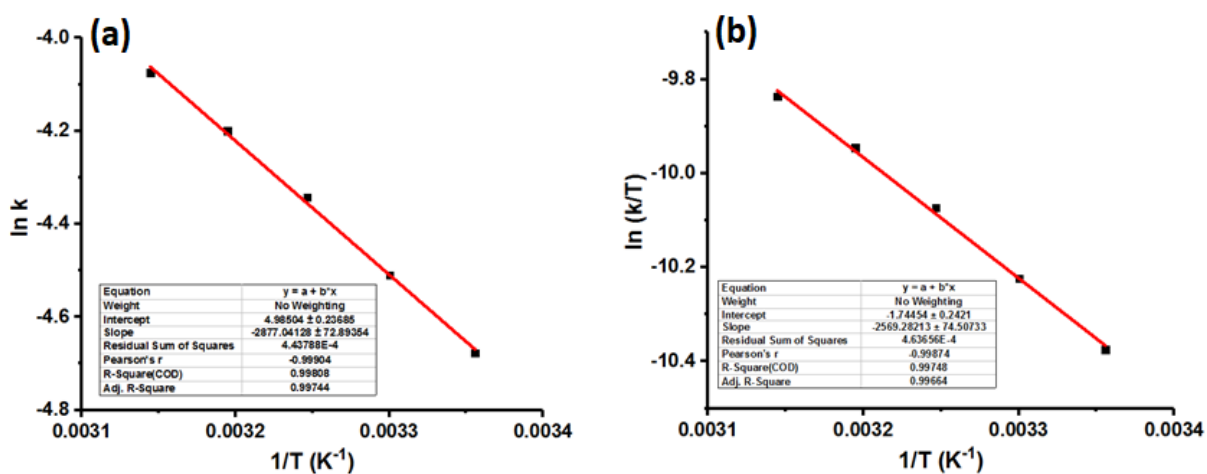

**Figure S27.** Arrhenius plot (a) and Eyring plot (b) for the thermal reverse isomerization of **HPAI**.

**Table S13.** Activation parameters derived from Arrhenius and Eyring plots for **HPAI**.

| Compound    | $E_a$<br>kcal mol <sup>-1</sup> | $\Delta G^\ddagger$ (298K)<br>kcal mol <sup>-1</sup> | $\Delta H^\ddagger$<br>kcal mol <sup>-1</sup> | $\Delta S^\ddagger$<br>cal K <sup>-1</sup> |
|-------------|---------------------------------|------------------------------------------------------|-----------------------------------------------|--------------------------------------------|
| <b>HPAI</b> | $5.7 \pm 0.1$                   | $20.2 \pm 0.2$                                       | $5.1 \pm 0.1$                                 | $-50.7 \pm 0.5$                            |

## S7: Computational mechanistic aspects

**Table S14.** Computational data corresponding to the *E*- and *Z*- isomers of **HPIA** related to the thermal isomerization channels at M06-2X/cc-pVTZ (normal) and  $\omega$ B97X-D/def2tzvp (*italics*).

| species                          | Absolute energy (Hartree) | ZPVE (Hartree)  | Thermal energy (Hartree) | Thermal correction (Hartree) | Free energy (G) (Hartree) | Enthalpy (H) (Hartree) | Lowest frequency | Point group    |
|----------------------------------|---------------------------|-----------------|--------------------------|------------------------------|---------------------------|------------------------|------------------|----------------|
| <b>1E-C1-s</b>                   | -740.179777               | 0.210560        | -740.165807              | 0.224530                     | -740.222419               | -740.164863            | 13.87            | C <sub>1</sub> |
|                                  | <i>-740.236827</i>        | <i>0.211320</i> | <i>-740.222993</i>       | <i>0.225154</i>              | <i>-740.279306</i>        | <i>-740.222049</i>     | 13.94            | C <sub>1</sub> |
| <b>TS<sub>1E-C1-s-ph</sub></b>   | -740.106018               | 0.208022        | -740.091887              | 0.222152                     | -740.147928               | -740.090943            | 500.25i          | C <sub>1</sub> |
|                                  | <i>-740.163219</i>        | <i>0.208291</i> | <i>-740.149139</i>       | <i>0.222371</i>              | <i>-740.205156</i>        | <i>-740.148195</i>     | <i>513.57i</i>   | C <sub>1</sub> |
| <b>TS<sub>1E-C1-s-ox</sub></b>   | -740.103918               | 0.208273        | -740.090008              | 0.222183                     | -740.145003               | -740.089064            | 510.88i          | C <sub>1</sub> |
|                                  | <i>-740.160673</i>        | <i>0.208344</i> | <i>-740.146760</i>       | <i>0.222257</i>              | <i>-740.201708</i>        | <i>-740.145816</i>     | <i>522.85i</i>   | C <sub>1</sub> |
| <b>1E-C1-<math>\alpha</math></b> | -740.164931               | 0.210428        | -740.150749              | 0.224611                     | -740.206964               | -740.149805            | 21.13            | C <sub>1</sub> |
|                                  | <i>-740.221349</i>        | <i>0.210279</i> | <i>-740.207072</i>       | <i>0.224556</i>              | <i>-740.263524</i>        | <i>-740.206128</i>     | 23.35            | C <sub>1</sub> |
| <b>1E-C1-s-keto</b>              | -740.164918               | 0.208953        | -740.150886              | 0.222986                     | -740.208373               | -740.149941            | 7.25             | C <sub>1</sub> |
|                                  | <i>-740.225365</i>        | <i>0.210650</i> | <i>-740.211564</i>       | <i>0.224452</i>              | <i>-740.267292</i>        | <i>-740.210620</i>     | 21.43            | C <sub>1</sub> |
| <b>1E-C2-s</b>                   | -740.177942               | 0.211163        | -740.164280              | 0.224825                     | -740.218713               | -740.163336            | 39.96            | C <sub>1</sub> |
|                                  | <i>-740.236295</i>        | <i>0.210791</i> | <i>-740.222317</i>       | <i>0.224769</i>              | <i>-740.278514</i>        | <i>-740.221373</i>     | 20.06            | C <sub>1</sub> |
| <b>1E-C2-<math>\alpha</math></b> | -740.162306               | 0.210478        | -740.148131              | 0.224653                     | -740.204513               | -740.147187            | 17.69            | C <sub>s</sub> |
|                                  | <i>-740.482002</i>        | <i>0.206889</i> | <i>-740.467383</i>       | <i>0.221508</i>              | <i>-740.525138</i>        | <i>-740.466439</i>     | 15.57            | C <sub>s</sub> |
| <b>1E-C2-s-keto</b>              | -740.163694               | 0.209819        | -740.149819              | 0.223694                     | -740.205348               | -740.148875            | 28.79            | C <sub>1</sub> |
|                                  | <i>-740.225400</i>        | <i>0.210491</i> | <i>-740.211499</i>       | <i>0.224392</i>              | <i>-740.267361</i>        | <i>-740.210555</i>     | 23.86            | C <sub>1</sub> |
| <b>1E-C3-s</b>                   | -740.177515               | 0.210719        | -740.163517              | 0.224717                     | -740.219379               | -740.162572            | 26.90            | C <sub>1</sub> |
|                                  | <i>-740.233980</i>        | <i>0.210939</i> | <i>-740.219893</i>       | <i>0.225026</i>              | <i>-740.276416</i>        | <i>-740.218949</i>     | 26.20            | C <sub>1</sub> |
| <b>1E-C3-<math>\alpha</math></b> | -740.169981               | 0.209616        | -740.155478              | 0.224119                     | -740.213775               | -740.154534            | 6.31             | C <sub>1</sub> |
|                                  | <i>-740.225427</i>        | <i>0.210182</i> | <i>-740.211014</i>       | <i>0.224594</i>              | <i>-740.268045</i>        | <i>-740.210070</i>     | 20.39            | C <sub>1</sub> |
| <b>1E-C3-s-keto</b>              | -740.144853               | 0.211196        | -740.131064              | 0.224985                     | -740.186347               | -740.130120            | 25.02            | C <sub>s</sub> |
|                                  | <i>-740.206118</i>        | <i>0.210813</i> | <i>-740.192108</i>       | <i>0.224823</i>              | <i>-740.248184</i>        | <i>-740.191164</i>     | 25.69            | C <sub>s</sub> |
| <b>1E-C4-s</b>                   | -740.174993               | 0.210784        | -740.160881              | 0.224896                     | -740.217187               | -740.159936            | 19.81            | C <sub>1</sub> |
|                                  | <i>-740.231639</i>        | <i>0.211134</i> | <i>-740.217679</i>       | <i>0.225094</i>              | <i>-740.273393</i>        | <i>-740.216735</i>     | 26.45            | C <sub>1</sub> |
| <b>1E-C4-<math>\alpha</math></b> | -740.167989               | 0.209807        | -740.153592              | 0.224204                     | -740.210694               | -740.152648            | 15.11            | C <sub>1</sub> |
|                                  | <i>-740.223863</i>        | <i>0.210217</i> | <i>-740.209470</i>       | <i>0.224610</i>              | <i>-740.266530</i>        | <i>-740.208525</i>     | 16.94            | C <sub>1</sub> |
| <b>1E-C4-s-keto</b>              | -740.143454               | 0.210942        | -740.129533              | 0.224864                     | -740.185258               | -740.128589            | 24.39            | C <sub>1</sub> |

|                       |             |          |             |          |             |             |       |                |
|-----------------------|-------------|----------|-------------|----------|-------------|-------------|-------|----------------|
|                       | -740.204765 | 0.210866 | -740.190769 | 0.224863 | -740.246921 | -740.189825 | 19.38 | C <sub>1</sub> |
| <b>1Z-C1-s</b>        | -740.150894 | 0.210632 | -740.137108 | 0.224418 | -740.191326 | -740.136164 | 39.11 | C <sub>1</sub> |
|                       | -740.207400 | 0.210440 | -740.193418 | 0.224422 | -740.248294 | -740.192473 | 38.06 | C <sub>1</sub> |
| <b>1Z-C1-<i>α</i></b> | -740.150003 | 0.210270 | -740.136069 | 0.224204 | -740.190604 | -740.135124 | 40.38 | C <sub>1</sub> |
|                       | -740.206480 | 0.210441 | -740.192450 | 0.224472 | -740.247484 | -740.191506 | 40.61 | C <sub>1</sub> |
| <b>1Z-C1-s-keto</b>   | -740.137961 | 0.211340 | -740.124031 | 0.225270 | -740.178985 | -740.123087 | 40.06 | C <sub>1</sub> |
|                       | -740.199743 | 0.211096 | -740.185666 | 0.225173 | -740.241295 | -740.184722 | 33.67 | C <sub>1</sub> |
| <b>1Z-C2-s</b>        | -740.150698 | 0.210233 | -740.136745 | 0.224186 | -740.191491 | -740.135801 | 37.88 | C <sub>1</sub> |
|                       | -740.206778 | 0.210723 | -740.192901 | 0.224599 | -740.247411 | -740.191957 | 37.09 | C <sub>1</sub> |
| <b>1Z-C2-<i>α</i></b> | -740.150441 | 0.210462 | -740.136499 | 0.224404 | -740.191058 | -740.135555 | 42.01 | C <sub>1</sub> |
|                       | -740.206738 | 0.210749 | -740.192847 | 0.224640 | -740.247431 | -740.191903 | 43.61 | C <sub>1</sub> |
| <b>1Z-C2-s-keto</b>   | -740.138480 | 0.210805 | -740.124507 | 0.224778 | -740.179720 | -740.123563 | 27.02 | C <sub>1</sub> |
|                       | -740.199999 | 0.210947 | -740.185901 | 0.225046 | -740.241674 | -740.184957 | 27.60 | C <sub>1</sub> |
| <b>1Z-C3-s</b>        | -740.156052 | 0.210659 | -740.142152 | 0.224559 | -740.197050 | -740.141208 | 50.63 | C <sub>1</sub> |
|                       | -740.212651 | 0.211371 | -740.198946 | 0.225076 | -740.253402 | -740.198002 | 43.93 | C <sub>1</sub> |
| <b>1Z-C3-<i>α</i></b> | -740.149016 | 0.210339 | -740.135040 | 0.224315 | -740.190111 | -740.134096 | 40.03 | C <sub>1</sub> |
|                       | -740.205779 | 0.210583 | -740.191787 | 0.224575 | -740.247088 | -740.190843 | 32.77 | C <sub>1</sub> |
| <b>1Z-C4-s</b>        | -740.154858 | 0.211322 | -740.141251 | 0.224929 | -740.195346 | -740.140307 | 50.31 | C <sub>1</sub> |
|                       | -740.212344 | 0.211328 | -740.198656 | 0.225016 | -740.253190 | -740.197712 | 39.68 | C <sub>1</sub> |
| <b>1Z-C4-<i>α</i></b> | -740.148585 | 0.210496 | -740.134757 | 0.224324 | -740.189417 | -740.133812 | 32.70 | C <sub>1</sub> |
|                       | -740.205546 | 0.211075 | -740.191720 | 0.224901 | -740.246356 | -740.190776 | 43.57 | C <sub>1</sub> |

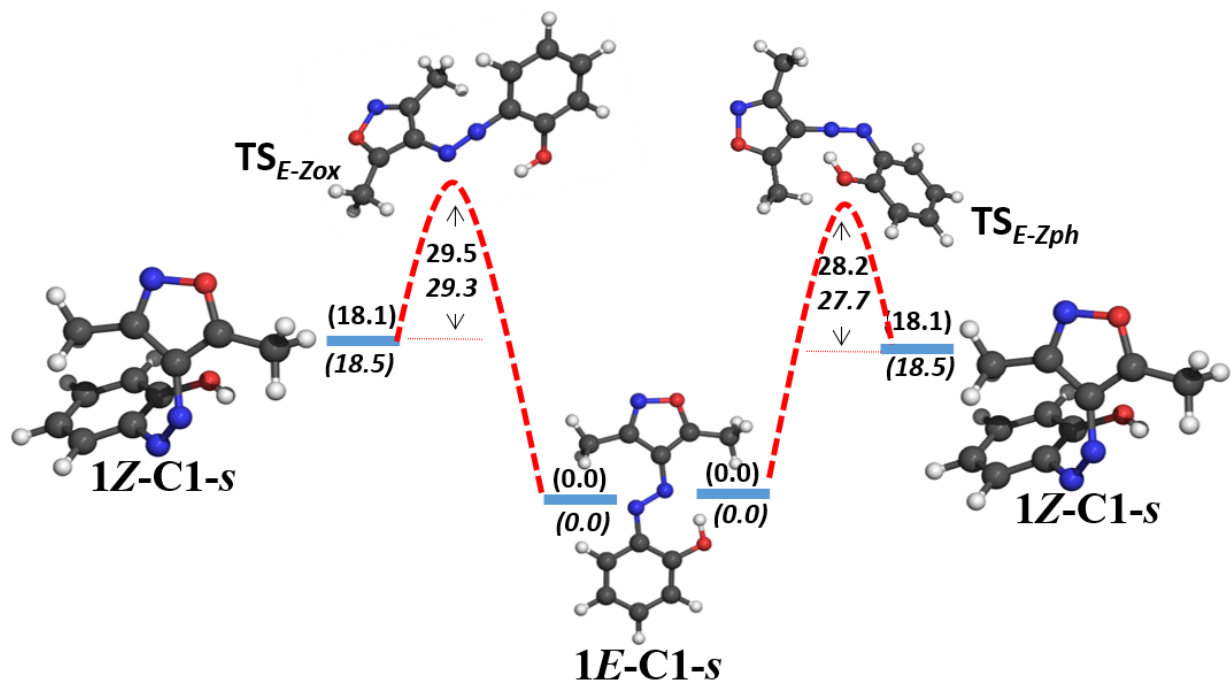

**Figure S28.** Computed energy profiles corresponding to the thermal reverse isomerization of **1Z-C1-s** to **1E-C1-s** (Computed barriers (in kcal/mol) for the thermal isomerization step involving inversion along the phenyl ring at M06-2x/cc-pVTZ (normal) and  $\omega$ B97X-D/def2tzvp (italics) levels of theory).

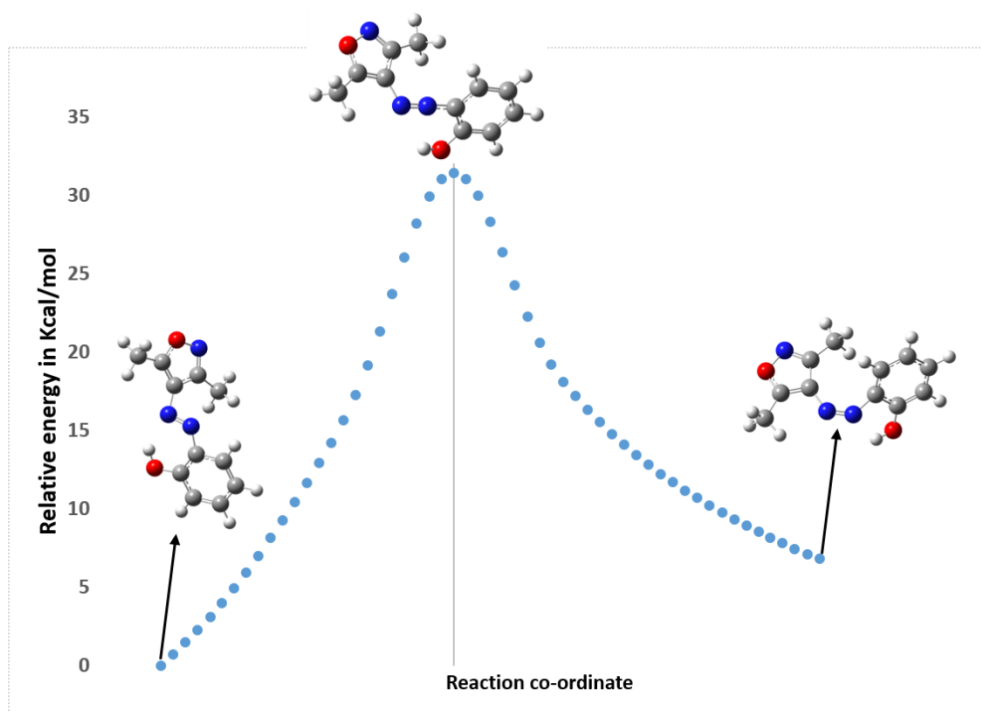

**Figure S29 a.** IRC analysis of transition state connecting **1Z-C1-s** to **1E-C1-s** inversion along phenyl ring at M06-2x/cc-pVTZ level of theory

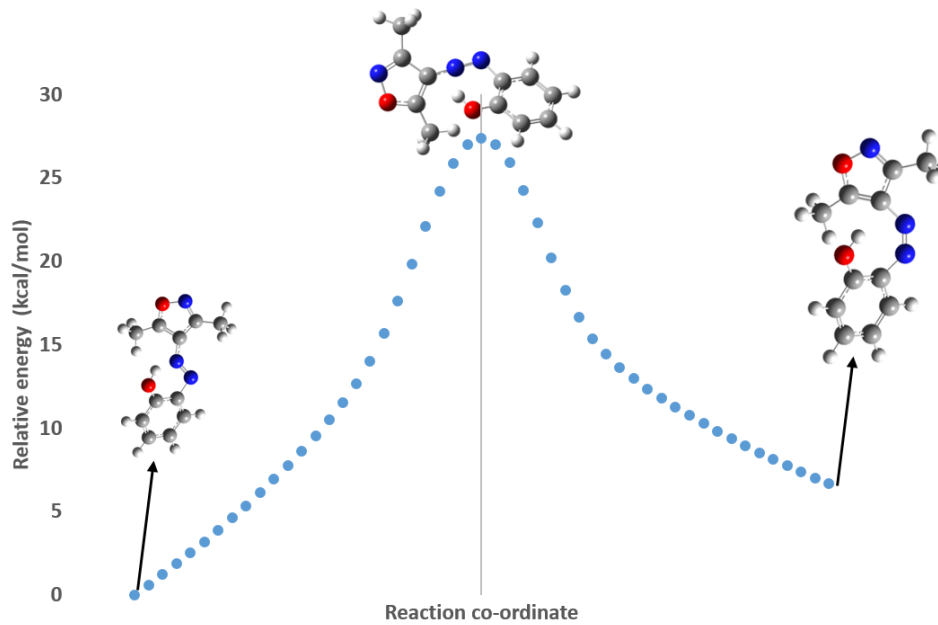

**Figure S29 b.** IRC analysis of transition state connecting **1Z-C1-s** to **1E-C1-s** inversion along oxazole ring at M06-2x/cc-pVTZ level of theory

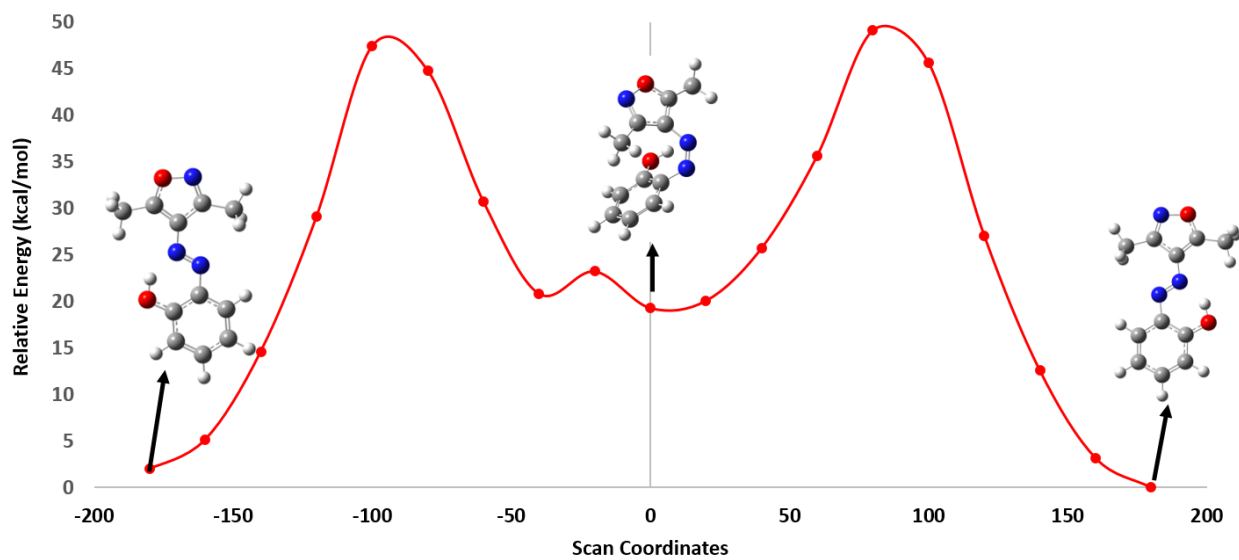

**Figure 30.** Computed energy profile corresponding to the rotational isomerization of **1E-C1-s** to **1Z-C1-s**. Dihedral scan around  $C_{\text{ph}}\text{-N}=\text{N}-C_{\text{iso}}$

## S9: Cartesian Coordinates

|                     |             |             |             |                |             |             |             |
|---------------------|-------------|-------------|-------------|----------------|-------------|-------------|-------------|
| <b>1E-C1-s</b>      |             |             |             | <b>1E-C1-a</b> |             |             |             |
| C                   | 3.95179500  | 1.30310600  | -0.00858500 | C              | -3.90104800 | -1.34446800 | 0.29990100  |
| C                   | 2.58199200  | 1.44711600  | -0.00957800 | C              | -2.52425600 | -1.44108300 | 0.23436200  |
| C                   | 1.73646800  | 0.33441300  | -0.00296500 | C              | -1.71316700 | -0.32914400 | 0.01558400  |
| C                   | 2.29456300  | -0.96112300 | 0.00518200  | C              | -2.32284300 | 0.92442000  | -0.17830900 |
| C                   | 3.68119900  | -1.09686400 | 0.00660800  | C              | -3.71068200 | 1.01220200  | -0.12269100 |
| C                   | 4.49520400  | 0.01889500  | -0.00036200 | C              | -4.49411000 | -0.10310800 | 0.11928900  |
| H                   | 4.59453400  | 2.17113800  | -0.01377000 | H              | -4.50304300 | -2.22239000 | 0.48345100  |
| H                   | 2.11440300  | 2.42273900  | -0.01565500 | H              | -2.02321300 | -2.39202100 | 0.35654200  |
| H                   | 4.08984300  | -2.09755800 | 0.01337600  | H              | -4.17553400 | 1.98024600  | -0.27262100 |
| H                   | 5.56903900  | -0.11171500 | 0.00080700  | H              | -5.56962800 | 0.00196900  | 0.16000400  |
| N                   | 0.36409200  | 0.62892500  | -0.00389500 | N              | -0.32927800 | -0.62072100 | -0.02589300 |
| N                   | -0.41875400 | -0.34606200 | -0.00171300 | N              | 0.44010700  | 0.34960600  | 0.09227500  |
| C                   | -2.76529200 | -0.95571900 | -0.00434200 | C              | 2.76902300  | 0.96570400  | 0.15077700  |
| C                   | -2.46151800 | 1.23642100  | 0.00395200  | C              | 2.50391000  | -1.21326100 | -0.11363700 |
| C                   | -1.77080500 | -0.02430300 | -0.00127600 | C              | 1.79038500  | 0.02452300  | 0.04323500  |
| C                   | -2.75871400 | -2.43525900 | -0.00991500 | C              | 2.70770900  | 2.43259000  | 0.32617900  |
| C                   | -1.91892100 | 2.62180000  | 0.00958500  | C              | 1.98001600  | -2.59550900 | -0.28159600 |
| N                   | -3.74514700 | 1.03883500  | 0.00395900  | N              | 3.78436300  | -0.99578900 | -0.09540200 |
| H                   | -3.29851100 | -2.81058600 | -0.87887200 | H              | 3.21803900  | 2.93394300  | -0.49587600 |
| H                   | -1.73631000 | -2.80212600 | -0.03950300 | H              | 1.66459600  | 2.73879100  | 0.34933200  |
| H                   | -3.24943100 | -2.81837200 | 0.88451800  | H              | 3.19604500  | 2.72500500  | 1.25560700  |
| H                   | -1.29408200 | 2.78734000  | -0.86638900 | H              | 1.34742600  | -2.65253200 | -1.16578100 |
| H                   | -2.74464200 | 3.32911000  | 0.01559800  | H              | 2.81209200  | -3.28952600 | -0.37346200 |
| H                   | -1.28925400 | 2.77814500  | 0.88380400  | H              | 1.35927200  | -2.86841700 | 0.57017400  |
| O                   | -3.93969500 | -0.33596700 | -0.00151300 | O              | 3.95543000  | 0.37551100  | 0.07054500  |
| O                   | 1.54451800  | -2.07047900 | 0.01246100  | O              | -1.57285100 | 2.01973700  | -0.44353700 |
| H                   | 0.60865200  | -1.77933400 | 0.01022100  | H              | -2.16265700 | 2.75407500  | -0.63885400 |
| <b>1E-C1-s-keto</b> |             |             |             | <b>1E-C2-s</b> |             |             |             |
| C                   | 4.01100500  | 1.23363000  | -0.01374800 | C              | 1.39344100  | -3.92684800 | 0.00000000  |
| C                   | 2.67673000  | 1.47415000  | -0.01607500 | C              | 0.43306100  | -2.93988200 | 0.00000000  |
| C                   | 1.74727200  | 0.39661000  | -0.00487300 | C              | 0.78420400  | -1.58684500 | 0.00000000  |
| C                   | 2.20609800  | -0.98488100 | 0.00890400  | C              | 2.14821800  | -1.22337400 | 0.00000000  |
| C                   | 3.62908700  | -1.17592500 | 0.01102000  | C              | 3.11212200  | -2.23009200 | 0.00000000  |
| C                   | 4.47672800  | -0.11402300 | 0.00015400  | C              | 2.73910000  | -3.55936600 | 0.00000000  |
| H                   | 4.72126500  | 2.04697100  | -0.02254600 | H              | 1.10920800  | -4.96896600 | 0.00000000  |
| H                   | 2.27272900  | 2.47795700  | -0.02664900 | H              | -0.62269100 | -3.17637300 | 0.00000000  |
| H                   | 3.98669400  | -2.19591300 | 0.02149700  | H              | 4.15135200  | -1.93233700 | 0.00000000  |
| H                   | 5.54469600  | -0.29284900 | 0.00202800  | H              | 3.50544200  | -4.32295500 | 0.00000000  |
| N                   | 0.44504100  | 0.72184000  | -0.00804600 | N              | -0.29245300 | -0.68731600 | 0.00000000  |
| N                   | -0.39259400 | -0.24580600 | 0.00202900  | N              | 0.00000000  | 0.52958000  | 0.00000000  |
| C                   | -2.71460600 | -0.97941500 | -0.00687300 | C              | -0.94294900 | 2.82773000  | 0.00000000  |
| C                   | -2.48258800 | 1.22084800  | 0.00629100  | C              | -2.42743300 | 1.19099300  | 0.00000000  |
| C                   | -1.75915000 | -0.01344500 | -0.00001000 | C              | -1.07707000 | 1.40771600  | 0.00000000  |
| C                   | -2.65365800 | -2.45882900 | -0.01526600 | C              | 0.31786800  | 3.61717400  | 0.00000000  |
| C                   | -1.97497100 | 2.61961700  | 0.01624800  | C              | -3.26949500 | -0.02558900 | 0.00000000  |
| N                   | -3.76095700 | 0.98002800  | 0.00330100  | H              | 0.08873100  | 4.67942600  | 0.00000000  |
| H                   | -3.17439800 | -2.85377500 | -0.88717200 | H              | 0.91467900  | 3.37797800  | 0.88000300  |

|                                  |             |             |             |                                  |             |             |             |
|----------------------------------|-------------|-------------|-------------|----------------------------------|-------------|-------------|-------------|
| H                                | -1.61964200 | -2.79699400 | -0.04218600 | H                                | 0.91467900  | 3.37797800  | -0.88000300 |
| H                                | -3.13091700 | -2.86353200 | 0.87694800  | H                                | -3.04363700 | -0.63456200 | 0.87462100  |
| H                                | -1.35517600 | 2.80658700  | -0.85910200 | H                                | -4.32033000 | 0.25327800  | 0.00000000  |
| H                                | -2.81967000 | 3.30374900  | 0.02328600  | H                                | -3.04363700 | -0.63456200 | -0.87462100 |
| H                                | -1.35229200 | 2.79267900  | 0.89252300  | O                                | -3.04032700 | 2.37061100  | 0.00000000  |
| O                                | -3.91234400 | -0.39177100 | -0.00490200 | N                                | -2.10912400 | 3.39969400  | 0.00000000  |
| O                                | 1.39456500  | -1.94750200 | 0.01902100  | O                                | 2.55772300  | 0.05031500  | 0.00000000  |
| H                                | 0.05684600  | -1.21314900 | 0.01281100  | H                                | 1.75168300  | 0.61029300  | 0.00000000  |
| <b>1E-C2-<math>\alpha</math></b> |             |             |             | <b>1E-C2-s-keto</b>              |             |             |             |
| C                                | 1.36562400  | -3.90771300 | 0.00000000  | C                                | 4.00273400  | 1.25754900  | 0.08118500  |
| C                                | 0.44072500  | -2.88200600 | 0.00000000  | C                                | 2.66861900  | 1.48779500  | 0.10218300  |
| C                                | 0.81755800  | -1.53879400 | 0.00000000  | C                                | 1.74392700  | 0.40476000  | 0.03422200  |
| C                                | 2.19124100  | -1.22543900 | 0.00000000  | C                                | 2.21474800  | -0.97400600 | -0.05342100 |
| C                                | 3.11726300  | -2.26505600 | 0.00000000  | C                                | 3.64267600  | -1.15134400 | -0.07512200 |
| C                                | 2.71655800  | -3.58943100 | 0.00000000  | C                                | 4.48023600  | -0.08574000 | -0.01043800 |
| H                                | 1.04106400  | -4.93804100 | 0.00000000  | H                                | 4.70778300  | 2.07390000  | 0.13304400  |
| H                                | -0.62167200 | -3.08548200 | 0.00000000  | H                                | 2.25731600  | 2.48630700  | 0.17098300  |
| H                                | 4.17299800  | -2.01768800 | 0.00000000  | H                                | 4.00821000  | -2.16628800 | -0.14335500 |
| H                                | 3.46385700  | -4.37113600 | 0.00000000  | H                                | 5.54976000  | -0.25421300 | -0.02788900 |
| N                                | -0.27392300 | -0.64068200 | 0.00000000  | N                                | 0.44525700  | 0.72208500  | 0.05477000  |
| N                                | 0.00000000  | 0.57427500  | 0.00000000  | N                                | -0.40003800 | -0.24219700 | -0.00473000 |
| C                                | -1.00876500 | 2.83693700  | 0.00000000  | C                                | -2.76180700 | -1.01517700 | 0.04102100  |
| C                                | -2.45522900 | 1.16935900  | 0.00000000  | C                                | -2.45614800 | 1.17216300  | -0.04206100 |
| C                                | -1.10940400 | 1.41364600  | 0.00000000  | C                                | -1.76494600 | 0.00108300  | -0.00348700 |
| C                                | 0.23771200  | 3.64802500  | 0.00000000  | O                                | -3.76165200 | 0.88045700  | -0.01846400 |
| C                                | -3.27134800 | -0.06513500 | 0.00000000  | N                                | -3.94848600 | -0.48386500 | 0.03230200  |
| H                                | -0.00733500 | 4.70685600  | 0.00000000  | O                                | 1.41529900  | -1.93883600 | -0.10625900 |
| H                                | 0.83822000  | 3.40978500  | 0.87702500  | H                                | 0.02592400  | -1.20698200 | -0.06138900 |
| H                                | 0.83822000  | 3.40978500  | -0.87702500 | C                                | -2.54921400 | -2.48699300 | 0.09036600  |
| H                                | -3.03178000 | -0.66896200 | 0.87447900  | H                                | -2.01193600 | -2.82673300 | -0.79574100 |
| H                                | -4.32831600 | 0.19024700  | 0.00000000  | H                                | -1.95310100 | -2.75907200 | 0.96184900  |
| H                                | -3.03178000 | -0.66896200 | -0.87447900 | H                                | -3.50846600 | -2.99482900 | 0.14123200  |
| O                                | -3.09621800 | 2.33404900  | 0.00000000  | C                                | -2.06835000 | 2.60037800  | -0.10089300 |
| N                                | -2.18624200 | 3.38537600  | 0.00000000  | H                                | -1.65273900 | 2.92504400  | 0.85317800  |
| O                                | 2.60486200  | 0.06108400  | 0.00000000  | H                                | -1.30121200 | 2.75164700  | -0.85754300 |
| H                                | 3.56691500  | 0.07339000  | 0.00000000  | H                                | -2.94269900 | 3.20328800  | -0.33430100 |
| <b>1E-C3-s</b>                   |             |             |             | <b>1E-C3-<math>\alpha</math></b> |             |             |             |
| C                                | 3.47000000  | -1.77857200 | -0.00040600 | C                                | 3.41045600  | -1.82338100 | -0.00058100 |
| C                                | 2.12135700  | -1.48968100 | -0.00037700 | C                                | 2.07080700  | -1.48682600 | -0.00059200 |
| C                                | 1.69386700  | -0.16268300 | -0.00003300 | C                                | 1.66994400  | -0.15237100 | -0.00012100 |
| C                                | 2.63177000  | 0.87739200  | 0.00022900  | C                                | 2.64025500  | 0.85679800  | 0.00033600  |
| C                                | 3.99124700  | 0.58189700  | 0.00020100  | C                                | 3.98894900  | 0.51343900  | 0.00036300  |
| C                                | 4.39981400  | -0.73787600 | -0.00010700 | C                                | 4.36995000  | -0.81646000 | -0.00009400 |
| H                                | 3.80608300  | -2.80555900 | -0.00067900 | H                                | 3.71073400  | -2.86150700 | -0.00096700 |
| H                                | 1.37677800  | -2.27266100 | -0.00063400 | H                                | 1.30311800  | -2.24691700 | -0.00100000 |
| H                                | 4.69924800  | 1.39822900  | 0.00041800  | H                                | 4.73554200  | 1.29884300  | 0.00075300  |
| H                                | 5.45766100  | -0.96369500 | -0.00013600 | H                                | 5.42192900  | -1.06756800 | -0.00008100 |
| N                                | 0.35123000  | 0.26765800  | 0.00002600  | N                                | 0.32303900  | 0.28123900  | -0.00014600 |
| N                                | -0.51075700 | -0.62918800 | 0.00006500  | N                                | -0.52397200 | -0.62961800 | 0.00006200  |
| C                                | -2.89382000 | -1.02672500 | 0.00012300  | C                                | -2.91870000 | -1.00538000 | 0.00025400  |
| C                                | -2.41209400 | 1.13178500  | -0.00018400 | C                                | -2.40264800 | 1.14643500  | -0.00030500 |

|                     |             |             |             |                     |             |             |             |
|---------------------|-------------|-------------|-------------|---------------------|-------------|-------------|-------------|
| C                   | -1.82431600 | -0.18072700 | 0.00005000  | C                   | -1.83800300 | -0.17633800 | -0.00000400 |
| C                   | -2.99800100 | -2.50165800 | 0.00048400  | C                   | -3.04628600 | -2.47893500 | 0.00063100  |
| C                   | -1.76016900 | 2.46994300  | -0.00031300 | C                   | -1.71582300 | 2.46615400  | -0.00067200 |
| N                   | -3.70713200 | 1.04141400  | -0.00027500 | N                   | -3.69922100 | 1.07724000  | -0.00022600 |
| H                   | -3.54040000 | -2.84163000 | -0.88147700 | H                   | -3.59355600 | -2.81107400 | -0.88136700 |
| H                   | -2.00024400 | -2.93174200 | 0.00073900  | H                   | -2.05531300 | -2.92473400 | 0.00096000  |
| H                   | -3.54054100 | -2.84108800 | 0.88257900  | H                   | -3.59392900 | -2.81058000 | 0.88258100  |
| H                   | -1.12766600 | 2.58219500  | -0.88049300 | H                   | -1.06858600 | 2.55352000  | -0.87184900 |
| H                   | -2.52454800 | 3.24331900  | -0.00063700 | H                   | -2.45859200 | 3.26043400  | -0.00081900 |
| H                   | -1.12807700 | 2.58253600  | 0.88012400  | H                   | -1.06844900 | 2.55395200  | 0.87036000  |
| O                   | -4.01354400 | -0.31385200 | -0.00010000 | O                   | -4.02827700 | -0.27546800 | 0.00012700  |
| O                   | 2.23849500  | 2.16677400  | 0.00049200  | O                   | 2.22802700  | 2.14684500  | 0.00077500  |
| H                   | 1.27077700  | 2.16895400  | 0.00035800  | H                   | 2.99678100  | 2.72376500  | 0.00107600  |
| <b>1E-C3-s-keto</b> |             |             |             | <b>1E-C4-s</b>      |             |             |             |
| C                   | -1.88663300 | 3.53312700  | 0.00000000  | C                   | -3.46812300 | -1.77410300 | 0.00004600  |
| C                   | -1.68153700 | 2.18942900  | 0.00000000  | C                   | -2.11976700 | -1.48532800 | 0.00003900  |
| C                   | -0.35510500 | 1.71346900  | 0.00000000  | C                   | -1.69289300 | -0.15763300 | 0.00000000  |
| C                   | 0.82014400  | 2.57510900  | 0.00000000  | C                   | -2.63149200 | 0.88223200  | -0.00002100 |
| C                   | 0.51856400  | 3.98810900  | 0.00000000  | C                   | -3.99074200 | 0.58665400  | -0.00001000 |
| C                   | -0.76748200 | 4.42293900  | 0.00000000  | C                   | -4.39854700 | -0.73330600 | 0.00001900  |
| H                   | -2.88828400 | 3.93649500  | 0.00000000  | H                   | -3.80382700 | -2.80108200 | 0.00008200  |
| H                   | -2.49863900 | 1.48116100  | 0.00000000  | H                   | -1.37352200 | -2.26665700 | 0.00006800  |
| H                   | 1.35445500  | 4.67324700  | 0.00000000  | H                   | -4.69931500 | 1.40242400  | -0.00002800 |
| H                   | -0.96180200 | 5.48822400  | 0.00000000  | H                   | -5.45609700 | -0.95997300 | 0.00002700  |
| N                   | 0.00000000  | 0.41000000  | 0.00000000  | N                   | -0.35097200 | 0.27241900  | 0.00003100  |
| N                   | -0.75088800 | -0.60592400 | 0.00000000  | N                   | 0.51203300  | -0.62484100 | -0.00008800 |
| C                   | -0.81944600 | -3.00883900 | 0.00000000  | C                   | 2.36589900  | 1.08383000  | 0.00001200  |
| C                   | 1.25961600  | -2.24553000 | 0.00000000  | C                   | 2.95968500  | -1.04340900 | -0.00002600 |
| C                   | -0.12312300 | -1.83231900 | 0.00000000  | C                   | 1.82663600  | -0.17415300 | -0.00001100 |
| C                   | -2.26753000 | -3.30300600 | 0.00000000  | C                   | 1.79144900  | 2.44809200  | 0.00004000  |
| C                   | 2.51250500  | -1.43598100 | 0.00000000  | C                   | 2.96196300  | -2.53054500 | -0.00003800 |
| N                   | 1.33546400  | -3.54218700 | 0.00000000  | N                   | 4.06470400  | -0.36141800 | 0.00001800  |
| H                   | -2.53588500 | -3.88446000 | 0.88188400  | H                   | 2.59098700  | 3.18476700  | 0.00019300  |
| H                   | -2.82361300 | -2.36953700 | 0.00000000  | H                   | 1.16334000  | 2.59001400  | -0.87967400 |
| H                   | -2.53588500 | -3.88446000 | -0.88188400 | H                   | 1.16311000  | 2.58986900  | 0.87961200  |
| H                   | 2.57352100  | -0.79280400 | 0.87998400  | H                   | 2.44038500  | -2.90811700 | -0.87842100 |
| H                   | 3.36713200  | -2.10727700 | 0.00000000  | H                   | 3.98492600  | -2.89714100 | -0.00047100 |
| H                   | 2.57352100  | -0.79280400 | -0.87998400 | H                   | 2.44116600  | -2.90812700 | 0.87880900  |
| O                   | 0.03766500  | -4.02240000 | 0.00000000  | O                   | 3.69004400  | 0.97616100  | 0.00003800  |
| O                   | 1.96104700  | 2.08399700  | 0.00000000  | O                   | -2.23819300 | 2.17202200  | -0.00006600 |
| H                   | 1.03392000  | 0.34717300  | 0.00000000  | H                   | -1.27073300 | 2.17145500  | 0.00000300  |
| <b>1E-C4-a</b>      |             |             |             | <b>1E-C4-s-keto</b> |             |             |             |
| C                   | -3.40719988 | -1.81971911 | 0.00143599  | C                   | 3.63617700  | 1.68573100  | -0.07422400 |
| C                   | -2.06798289 | -1.48216105 | 0.01087601  | C                   | 2.28270900  | 1.56544300  | -0.05814900 |
| C                   | -1.66899895 | -0.14691803 | 0.01012998  | C                   | 1.72723900  | 0.27147800  | 0.00840700  |
| C                   | -2.64020999 | 0.86105192  | -0.00005907 | C                   | 2.51657700  | -0.95332400 | 0.05751900  |
| C                   | -3.98845498 | 0.51655887  | -0.01048808 | C                   | 3.94477000  | -0.74095400 | 0.03648100  |
| C                   | -4.36789392 | -0.81381615 | -0.00954205 | C                   | 4.45692200  | 0.51474200  | -0.02603200 |
| H                   | -3.70641784 | -2.85815012 | 0.00300701  | H                   | 4.10072800  | 2.65930700  | -0.12532600 |
| H                   | -1.29855886 | -2.24057702 | 0.02000504  | H                   | 1.62490700  | 2.42293900  | -0.09383000 |
| H                   | -4.73595801 | 1.30106884  | -0.01970412 | H                   | 4.57734100  | -1.61667900 | 0.07028800  |



|                     |             |             |             |                |             |             |             |
|---------------------|-------------|-------------|-------------|----------------|-------------|-------------|-------------|
| H                   | -5.41953491 | -1.06618619 | -0.01715607 | H              | 5.53185100  | 0.64425100  | -0.04116500 |
| N                   | -0.32289897 | 0.28661102  | 0.02128999  | N              | 0.40795400  | -0.00840500 | 0.02628500  |
| N                   | 0.52484407  | -0.62472294 | -0.00346596 | N              | -0.57218400 | 0.79074600  | -0.01143400 |
| C                   | 2.35628300  | 1.09745913  | -0.00005998 | C              | -2.25816800 | -1.09172100 | -0.04094700 |
| C                   | 2.98493009  | -1.02035984 | -0.00284790 | C              | -3.02865300 | 0.98132500  | 0.02466300  |
| C                   | 1.83973505  | -0.17018089 | 0.00125005  | C              | -1.82307800 | 0.21052200  | -0.00535700 |
| C                   | 1.74580394  | 2.44466811  | 0.00083098  | C              | -1.58401600 | -2.41211300 | -0.09471600 |
| C                   | 3.01332915  | -2.50762284 | -0.00520586 | C              | -3.14852700 | 2.46214400  | 0.06694800  |
| N                   | 4.07949706  | -0.32058279 | -0.00442790 | N              | -4.07018400 | 0.20834300  | 0.01298500  |
| H                   | 2.52058491  | 3.20264214  | -0.08576703 | H              | -2.33146100 | -3.19340200 | -0.20587400 |
| H                   | 1.03141295  | 2.52996106  | -0.81691404 | H              | -0.88759000 | -2.47025500 | -0.93457800 |
| H                   | 1.17483192  | 2.59387711  | 0.91750696  | H              | -1.00851300 | -2.60624100 | 0.81375000  |
| H                   | 2.49205818  | -2.89293188 | -0.88059786 | H              | -2.65393300 | 2.90516400  | -0.79653800 |
| H                   | 4.04260916  | -2.85652280 | -0.01372183 | H              | -4.19752700 | 2.74584500  | 0.06972500  |
| H                   | 2.50597615  | -2.89622584 | 0.87686714  | H              | -2.66399400 | 2.85429200  | 0.96028800  |
| O                   | 3.68243400  | 1.01176519  | -0.00363495 | O              | -3.58957600 | -1.08975700 | -0.02897700 |
| O                   | -2.22916605 | 2.15232794  | -0.00203809 | O              | 1.95499900  | -2.06062500 | 0.10908600  |
| H                   | -2.99928607 | 2.72740191  | -0.00983412 | H              | 0.29399900  | -1.03658500 | 0.07998700  |
| <b>1Z-C1-s</b>      |             |             |             | <b>1Z-C1-σ</b> |             |             |             |
| C                   | 2.34450200  | -0.10200500 | 1.53034600  | C              | 2.27566400  | -0.17087600 | 1.54940200  |
| C                   | 1.30070500  | -0.72147500 | 0.85139800  | C              | 1.24279400  | -0.74130600 | 0.81519400  |
| C                   | 1.32868500  | -0.76818500 | -0.54652100 | C              | 1.31441300  | -0.74094700 | -0.58146100 |
| C                   | 2.43918300  | -0.28515100 | -1.23050700 | C              | 2.45603500  | -0.25404400 | -1.20519000 |
| C                   | 3.46688300  | 0.34318900  | -0.55342300 | C              | 3.47823500  | 0.32439400  | -0.47313900 |
| C                   | 3.40874600  | 0.44085800  | 0.83329900  | C              | 3.37953800  | 0.37158100  | 0.91090700  |
| H                   | 2.29663800  | -0.06663600 | 2.60971700  | H              | 2.20819000  | -0.15828200 | 2.63097600  |
| H                   | 2.45937900  | -0.39640900 | -2.30655900 | H              | 2.50901200  | -0.32506800 | -2.28361000 |
| H                   | 4.31115000  | 0.74308900  | -1.09613000 | H              | 4.34735800  | 0.72511400  | -0.97430200 |
| H                   | 4.20842600  | 0.92475500  | 1.37687300  | H              | 4.17007600  | 0.81514100  | 1.50002500  |
| N                   | 0.32860200  | -1.45499800 | -1.30119400 | N              | 0.33231600  | -1.36863000 | -1.40764000 |
| N                   | -0.87533600 | -1.16560100 | -1.21510100 | N              | -0.86890600 | -1.08012100 | -1.34034400 |
| C                   | -0.98279900 | 1.30483200  | -0.25825800 | C              | -0.98018000 | 1.32002700  | -0.25934600 |
| C                   | -2.62983100 | -0.13763800 | 0.05183100  | C              | -2.59386800 | -0.15152200 | 0.05105000  |
| C                   | -1.38215300 | -0.06237200 | -0.49507000 | C              | -1.38008300 | -0.03076300 | -0.55064100 |
| C                   | -3.60870500 | -1.24443800 | 0.12611000  | C              | -3.53977400 | -1.28464000 | 0.13433500  |
| C                   | 0.21106100  | 2.07939400  | -0.70285200 | C              | 0.19479400  | 2.11521600  | -0.71933800 |
| H                   | 0.45995800  | 1.83761400  | -1.73494300 | H              | 0.43156100  | 1.88081900  | -1.75617900 |
| H                   | -0.01645500 | 3.13976200  | -0.62539500 | H              | -0.04216300 | 3.17296400  | -0.63337200 |
| H                   | 1.08190400  | 1.85501400  | -0.08848200 | H              | 1.07856300  | 1.89908500  | -0.11965100 |
| H                   | -3.30763700 | -2.03209400 | -0.56065700 | H              | -3.31260400 | -1.99330400 | -0.65902100 |
| H                   | -3.65672700 | -1.65108500 | 1.13689800  | H              | -3.44114900 | -1.79469500 | 1.09327900  |
| H                   | -4.60077800 | -0.88204700 | -0.13850100 | H              | -4.56399000 | -0.92912600 | 0.03752400  |
| O                   | 0.31380800  | -1.27259400 | 1.59953600  | O              | 0.16945400  | -1.32326100 | 1.40878800  |
| H                   | -0.31005700 | -1.74569700 | 1.04066300  | H              | 0.27103700  | -1.28332000 | 2.36376600  |
| O                   | -2.94126700 | 1.02373800  | 0.60952800  | O              | -2.88862500 | 0.97809100  | 0.68697100  |
| N                   | -1.92237900 | 1.93239000  | 0.38427900  | N              | -1.89025700 | 1.90722500  | 0.46282000  |
| <b>1Z-C1-s-keto</b> |             |             |             | <b>1Z-C2-s</b> |             |             |             |
| C                   | 2.11887000  | -1.07863800 | 1.33068700  | C              | 2.30823700  | -0.35663100 | 1.53007100  |
| C                   | 1.10229400  | -0.97155700 | 0.28617700  | C              | 1.27876100  | -0.85467200 | 0.73978600  |
| C                   | 1.42143000  | -0.02183900 | -0.82305400 | C              | 1.32688700  | -0.66284100 | -0.64478400 |
| C                   | 2.78338300  | 0.45320000  | -0.95367000 | C              | 2.44570600  | -0.06913000 | -1.21856500 |

|                |             |             |             |                     |             |             |             |
|----------------|-------------|-------------|-------------|---------------------|-------------|-------------|-------------|
| C              | 3.69151400  | 0.24288200  | 0.01422000  | C                   | 3.46309300  | 0.43426700  | -0.42880300 |
| C              | 3.33091200  | -0.51180900 | 1.19187700  | C                   | 3.38327700  | 0.29630800  | 0.95255600  |
| H              | 1.85421600  | -1.67629100 | 2.19190000  | H                   | 2.24481800  | -0.50779700 | 2.59866200  |
| H              | 3.00987500  | 1.03120500  | -1.83943200 | H                   | 2.48400100  | 0.00391000  | -2.29756500 |
| H              | 4.69256400  | 0.63974200  | -0.07362300 | H                   | 4.31582000  | 0.91642200  | -0.88449400 |
| H              | 4.07282800  | -0.63744400 | 1.97053600  | H                   | 4.17354400  | 0.67802400  | 1.58393600  |
| N              | 0.62059000  | 0.35482900  | -1.78289100 | N                   | 0.33908300  | -1.21102400 | -1.52573000 |
| N              | -0.69017800 | 0.20863400  | -1.71822100 | N                   | -0.86694500 | -0.93800200 | -1.41307800 |
| C              | -1.34890200 | 1.34550100  | 0.45208900  | C                   | -0.99618100 | 1.29438300  | -0.17676400 |
| C              | -2.41047400 | -0.51202700 | -0.07487700 | C                   | -2.64693700 | -0.14131000 | 0.11155500  |
| C              | -1.44649400 | 0.31965800  | -0.53580200 | C                   | -1.37199300 | 0.02523700  | -0.51476200 |
| C              | -2.92368700 | -1.80804500 | -0.56355000 | C                   | -3.52171600 | -1.34312000 | 0.06230700  |
| C              | -0.41737600 | 2.50649000  | 0.48678500  | C                   | 0.13752000  | 2.18247100  | -0.52487900 |
| H              | -0.31787500 | 2.94829900  | -0.50457300 | N                   | -2.97113800 | 0.91608100  | 0.78995100  |
| H              | -0.78559300 | 3.25489500  | 1.18383900  | H                   | 0.47597500  | 1.98506000  | -1.53918500 |
| H              | 0.57675300  | 2.18573100  | 0.80291100  | H                   | -0.18065000 | 3.21934500  | -0.44197800 |
| H              | -2.35990100 | -2.10233100 | -1.44515200 | H                   | 0.98022700  | 2.01183300  | 0.14839400  |
| H              | -2.77858700 | -2.56353700 | 0.20744700  | H                   | -3.68569900 | -1.64239500 | -0.97206100 |
| H              | -3.98491800 | -1.75047500 | -0.80367600 | H                   | -3.05319200 | -2.18198500 | 0.57814400  |
| O              | 0.10798500  | -1.68117200 | 0.27336200  | H                   | -4.47326500 | -1.12662900 | 0.54029700  |
| O              | -2.88964000 | -0.02045600 | 1.06594900  | O                   | -1.94694800 | 1.82318200  | 0.59350500  |
| N              | -2.21707700 | 1.14201700  | 1.39897900  | O                   | 0.28129800  | -1.52527500 | 1.36630100  |
| H              | -1.12828600 | 0.56197600  | -2.55502400 | H                   | -0.30328900 | -1.93819800 | 0.72309000  |
| <b>1Z-C2-a</b> |             |             |             | <b>1Z-C2-s-keto</b> |             |             |             |
| C              | -2.20758700 | -0.71375700 | -1.45798900 | C                   | 2.25170600  | 0.48949700  | 1.57181500  |
| C              | -1.19800300 | -0.97929700 | -0.54178800 | C                   | 1.15811900  | -0.22442900 | 0.91657400  |
| C              | -1.30986700 | -0.48883900 | 0.76319400  | C                   | 1.44358200  | -0.69913400 | -0.46647600 |
| C              | -2.46445800 | 0.18351400  | 1.14079100  | C                   | 2.80834900  | -0.66864700 | -0.94445500 |
| C              | -3.46557000 | 0.45693600  | 0.22343400  | C                   | 3.78048500  | -0.05119000 | -0.25001600 |
| C              | -3.32959500 | 0.00942100  | -1.08269800 | C                   | 3.47837600  | 0.56090100  | 1.02047400  |
| H              | -2.11022400 | -1.08678600 | -2.47079700 | H                   | 2.02797800  | 0.91547900  | 2.54014700  |
| H              | -2.55029800 | 0.49709100  | 2.17299800  | H                   | 2.99105600  | -1.12579200 | -1.90768300 |
| H              | -4.34787300 | 1.00103800  | 0.52796900  | H                   | 4.78855100  | -0.00227600 | -0.63540100 |
| H              | -4.10377800 | 0.20463000  | -1.81159600 | H                   | 4.27240800  | 1.07475000  | 1.54793100  |
| N              | -0.35887300 | -0.79258800 | 1.79164700  | N                   | 0.59651400  | -1.26766300 | -1.28653900 |
| N              | 0.84738400  | -0.54970200 | 1.66344600  | N                   | -0.70807300 | -1.23107900 | -1.13497500 |
| C              | 1.01771600  | 1.35633700  | 0.00763100  | C                   | -1.29280200 | 1.13434800  | -0.66051100 |
| C              | 2.56168500  | -0.20930300 | -0.11542600 | C                   | -2.61351700 | -0.35379100 | 0.28230600  |
| C              | 1.36213500  | 0.16376700  | 0.56119800  | C                   | -1.47050400 | -0.20474200 | -0.55345300 |
| C              | 3.36047400  | -1.44344800 | 0.10095400  | C                   | -3.19950100 | -1.62264300 | 0.78510500  |
| C              | -0.06025700 | 2.34032500  | 0.26097800  | C                   | -0.25347100 | 1.96189400  | -1.30999000 |
| N              | 2.87450100  | 0.67094400  | -1.01763400 | N                   | -3.08437600 | 0.80926200  | 0.61756600  |
| H              | -0.39488300 | 2.27186400  | 1.29385700  | H                   | 0.13615000  | 1.45601100  | -2.19133700 |
| H              | 0.30669500  | 3.34582300  | 0.06467900  | H                   | -0.66129600 | 2.93023200  | -1.59165800 |
| H              | -0.92005900 | 2.14334900  | -0.38320400 | H                   | 0.58196300  | 2.11944100  | -0.62022000 |
| H              | 3.65005300  | -1.52116700 | 1.14837500  | H                   | -3.52440600 | -2.26074300 | -0.03709200 |
| H              | 2.75995800  | -2.32075900 | -0.13919200 | H                   | -2.43993900 | -2.16061900 | 1.35293500  |
| H              | 4.24872600  | -1.42756800 | -0.52509400 | H                   | -4.05010400 | -1.40954200 | 1.42682000  |
| O              | 1.91901700  | 1.66683400  | -0.93169200 | O                   | -2.25203000 | 1.74790600  | 0.03656400  |
| O              | -0.10779800 | -1.72290400 | -0.85934700 | O                   | 0.11153500  | -0.48200700 | 1.49413800  |
| H              | -0.16919100 | -2.01346600 | -1.77358800 | H                   | -1.17179800 | -1.77016400 | -1.85065800 |

|                |             |             |             |                |             |             |             |
|----------------|-------------|-------------|-------------|----------------|-------------|-------------|-------------|
| <b>1Z-C3-s</b> |             |             |             | <b>1Z-C3-a</b> |             |             |             |
| C              | -3.39249300 | -0.32070000 | -0.05155400 | C              | -3.32841700 | -0.30192300 | -0.11647500 |
| C              | -2.44849800 | 0.67484200  | -0.26451000 | C              | -2.35957600 | 0.65349400  | -0.38539100 |
| C              | -1.21438000 | 0.61292200  | 0.38907400  | C              | -1.20387600 | 0.70577200  | 0.39599300  |
| C              | -0.96407700 | -0.39508200 | 1.31489200  | C              | -1.04772200 | -0.17895500 | 1.45394000  |
| C              | -1.91611200 | -1.37222000 | 1.54392100  | C              | -2.01974800 | -1.13026600 | 1.72549100  |
| C              | -3.11925300 | -1.34052900 | 0.84406700  | C              | -3.15829800 | -1.19112800 | 0.93506400  |
| H              | -4.33018600 | -0.26926300 | -0.58646100 | H              | -4.21474200 | -0.34948200 | -0.73816000 |
| H              | -0.02686500 | -0.40154300 | 1.85364300  | H              | -0.15911000 | -0.10687500 | 2.06685200  |
| H              | -1.72564000 | -2.15349500 | 2.26539700  | H              | -1.88992900 | -1.81505400 | 2.55094500  |
| H              | -3.85945100 | -2.11091900 | 1.01138800  | H              | -3.92121300 | -1.93047100 | 1.13535600  |
| N              | -0.35641500 | 1.72417300  | 0.15499100  | N              | -0.29761700 | 1.78714900  | 0.18412000  |
| N              | 0.86910100  | 1.61975900  | 0.00338700  | N              | 0.91419400  | 1.60798600  | 0.02279200  |
| C              | 1.22926100  | -0.80393900 | -0.91694900 | C              | 1.17659400  | -0.88597000 | -0.82638200 |
| C              | 2.80267000  | 0.18820200  | 0.27531100  | C              | 2.81579400  | 0.15882300  | 0.22049800  |
| C              | 1.52449600  | 0.37988900  | -0.15122600 | C              | 1.51664500  | 0.34033000  | -0.14888400 |
| C              | 3.71700000  | 1.03772100  | 1.06879300  | C              | 3.77561900  | 1.04893700  | 0.90914500  |
| C              | 0.03695700  | -1.14578900 | -1.74459800 | C              | -0.05223500 | -1.29027200 | -1.56806100 |
| H              | -0.35466000 | -0.25499900 | -2.23565600 | H              | -0.44992900 | -0.44960100 | -2.13612500 |
| H              | 0.32605900  | -1.87464900 | -2.49777000 | H              | 0.20169200  | -2.09957600 | -2.24839500 |
| H              | -0.76017900 | -1.56499500 | -1.13061600 | H              | -0.82764100 | -1.63230900 | -0.88270200 |
| H              | 3.30666000  | 2.04343800  | 1.12514200  | H              | 3.38557500  | 2.06402400  | 0.89462300  |
| H              | 3.83250700  | 0.64570600  | 2.07958900  | H              | 3.91840200  | 0.74009400  | 1.94501200  |
| H              | 4.70040300  | 1.06595100  | 0.60196200  | H              | 4.74179500  | 1.01367500  | 0.40829500  |
| O              | -2.71984300 | 1.66950000  | -1.13613100 | O              | -2.44386600 | 1.51942500  | -1.42556700 |
| H              | -2.02729000 | 2.33982000  | -1.05095800 | H              | -3.29511400 | 1.41979800  | -1.86065300 |
| O              | 3.22585600  | -1.00710800 | -0.12553500 | O              | 3.21317800  | -1.05840100 | -0.13164900 |
| N              | 2.24975700  | -1.60908700 | -0.89918600 | N              | 2.19299900  | -1.69734400 | -0.81361900 |
| <b>1Z-C4-s</b> |             |             |             | <b>1Z-C4-a</b> |             |             |             |
| C              | 3.38035400  | -0.33625600 | 0.05537000  | C              | 3.30497999  | -0.38854787 | 0.01455089  |
| C              | 2.43095300  | 0.65434500  | 0.27216500  | C              | 2.35624098  | 0.56014897  | 0.37053729  |
| C              | 1.21009600  | 0.60851100  | -0.40462700 | C              | 1.18582397  | 0.68568827  | -0.37796665 |
| C              | 0.97436900  | -0.38413100 | -1.35047400 | C              | 0.98821497  | -0.13195228 | -1.48287298 |
| C              | 1.92935500  | -1.35805600 | -1.58028100 | C              | 1.93749298  | -1.07577012 | -1.84099138 |
| C              | 3.12280200  | -1.33918700 | -0.86259700 | C              | 3.09718499  | -1.20180242 | -1.08909344 |
| H              | 4.30939300  | -0.29297000 | 0.60591000  | H              | 4.20696899  | -0.48593111 | 0.60722185  |
| H              | 0.04566600  | -0.38147800 | -1.90433800 | H              | 0.08669397  | -0.00720405 | -2.06804992 |
| H              | 1.74989100  | -2.12597600 | -2.31887000 | H              | 1.77559298  | -1.70176276 | -2.70659264 |
| H              | 3.86594600  | -2.10590100 | -1.03342400 | H              | 3.84580199  | -1.93290230 | -1.36087575 |
| N              | 0.34985300  | 1.72261400  | -0.16648800 | N              | 0.31551396  | 1.78646414  | -0.09450218 |
| N              | -0.87413400 | 1.61852300  | -0.00314300 | N              | -0.90068604 | 1.63950206  | 0.07051077  |
| C              | -1.22264700 | -0.70171700 | 0.93694700  | C              | -1.19103100 | -0.71945631 | 0.94922879  |
| C              | -2.84946800 | 0.12364500  | -0.30261200 | C              | -2.81563502 | 0.08547419  | -0.30235486 |
| C              | -1.52059000 | 0.37599900  | 0.15573500  | C              | -1.50863102 | 0.37089800  | 0.19757724  |
| C              | -3.68378100 | 0.99728000  | -1.16968200 | C              | -3.65651604 | 0.95512154  | -1.16728550 |
| C              | -0.06935200 | -1.06432100 | 1.79148500  | C              | -0.04446699 | -1.07089966 | 1.81656964  |
| N              | -3.27388200 | -1.02622700 | 0.12763300  | N              | -3.20992100 | -1.09117197 | 0.08200465  |
| H              | 0.39077300  | -0.16706900 | 2.20398000  | H              | 0.42001400  | -0.16799782 | 2.21121501  |
| H              | -0.40186200 | -1.70781800 | 2.60287100  | H              | -0.38548998 | -1.69600400 | 2.63928638  |
| H              | 0.69098000  | -1.58708700 | 1.20610800  | H              | 0.71032901  | -1.61666541 | 1.24578240  |
| H              | -3.77195200 | 1.98669600  | -0.72196200 | H              | -3.76566404 | 1.93762735  | -0.70945009 |
| H              | -3.22218600 | 1.12106200  | -2.14892900 | H              | -3.18662505 | 1.09821595  | -2.14023444 |

|   |             |             |             |   |             |             |             |
|---|-------------|-------------|-------------|---|-------------|-------------|-------------|
| H | -4.67153400 | 0.56115800  | -1.29219000 | H | -4.63498103 | 0.50329159  | -1.30675768 |
| O | -2.26251500 | -1.53685700 | 0.92143200  | O | -2.19986799 | -1.59176229 | 0.88320344  |
| O | 2.68525600  | 1.62770600  | 1.17453000  | O | 2.47851098  | 1.35324352  | 1.46534762  |
| H | 2.00755300  | 2.31153500  | 1.07857100  | H | 3.34191998  | 1.22050936  | 1.86655956  |

## References:

- 1 R. E. Stratmann, J. C. Burant, G. E. Scuseria and M. J. Frisch, *J. Chem. Phys.*, 1997, **106**, 10175–10183.
- 2 Y. Zhao and D. G. Truhlar, *Theor. Chem. Acc.*, 2008, **120**, 215–241.
- 3 J.-D. Chai and M. Head-Gordon, *Phys. Chem. Chem. Phys.*, 2008, **10**, 6615–6620.
- 4 R. A. Kendall, T. H. Dunning and R. J. Harrison, *J. Chem. Phys.*, 1992, **96**, 6796–6806.
- 5 T. H. Dunning, *J. Chem. Phys.*, 1989, **90**, 1007–1023.
- 6 F. Weigend and R. Ahlrichs, *Phys. Chem. Chem. Phys.*, 2005, **7**, 3297–3305.
- 7 K. Fukui, *Acc. Chem. Res.*, 1981, **14**, 363–368.
- 8 T. A. Halgren and W. N. Lipscomb, *Chem. Phys. Lett.*, 1977, **49**, 225–232.
- 9 P. Kumar, A. Srivastava, C. Sah, S. Devi and S. Venkataramani, *Chem. – Eur. J.*, 2019, **25**, 11924–11932.
